# Supplementary material for: Treatment with silica–gold nanostructures decreases inflammation-related gene expression in collagen-induced arthritis
Source: Royal Society of Chemistry journal article supplement (doi:10.1039/d2bm00498d), 2022-01-01
Supplement: d2bm00498d1.pdf [file d2bm00498d1.pdf]

## Complete list of genes dysregulated by GNS treatment

### Complete list of genes up-regulated by GNS treatment

| Gene Id  | Gene                                                                                         | Z-score  |
|----------|----------------------------------------------------------------------------------------------|----------|
| AA008901 | No data                                                                                      | 1.606293 |
| AA051784 | No data                                                                                      | 2.068295 |
| AB001432 | kinesin family member 15(Kif15)                                                              | 1.593081 |
| AB008181 | protocadherin alpha 5(Pcdha5)                                                                | 1.672131 |
| AB017136 | homer scaffolding protein 2(Homer2)                                                          | 1.567269 |
| AB022163 | F-box and WD-40 domain protein 4(Fbxw4)                                                      | 1.636583 |
| AB024499 | zinc finger homeodomain 4(Zfhx4)                                                             | 1.799988 |
| AB026046 | membrane-spanning 4-domains, subfamily A, member 10(Ms4a10)                                  | 1.681275 |
| AB030199 | integral membrane protein 2C(Itm2c)                                                          | 1.611706 |
| AB030912 | tripartite motif-containing 3(Trim3)                                                         | 1.685733 |
| AB033769 | killer cell lectin-like receptor, subfamily A, member 17(Klra17)                             | 1.92229  |
| AB035134 | TCF3 (E2A) fusion partner(Tfpt)                                                              | 2.022688 |
| AB037180 | aquaporin 9(Aqp9)                                                                            | 2.239226 |
| AB037923 | kinesin family member 13A(Kif13a)                                                            | 1.582968 |
| AB041575 | RAB6A, member RAS oncogene family(Rab6a)                                                     | 2.005738 |
| AB041610 | component of oligomeric golgi complex 8(Cog8)                                                | 1.830684 |
| AB041651 | Morf4 family associated protein 1(Mrfap1)                                                    | 1.879493 |
| AB049645 | mitochondrial ribosomal protein L20(Mrpl20)                                                  | 1.649548 |
| AB053955 | No data                                                                                      | 2.0401   |
| AB054987 | phosphatidylinositol-5-phosphate 4-kinase, type II, beta(Pip4k2b)                            | 1.717201 |
| AF004833 | tissue factor pathway inhibitor(Tfpi)                                                        | 1.961151 |
| AF010210 | No data                                                                                      | 1.80628  |
| AF010215 | No data                                                                                      | 1.925683 |
| AF012178 | No data                                                                                      | 1.95967  |
| AF014372 | No data                                                                                      | 2.253014 |
| AF020313 | amyloid beta (A4) precursor protein-binding, family B, member 1 interacting protein(Apbb1ip) | 2.01112  |
| AF020738 | fibroblast growth factor 12(Fgf12)                                                           | 1.753304 |
| AF022792 | ubiquitin specific peptidase 12(Usp12)                                                       | 1.755325 |
| AF022856 | No data                                                                                      | 1.780546 |
| AF023238 | No data                                                                                      | 1.808082 |
| AF029238 | No data                                                                                      | 2.639422 |
| AF037437 | No data                                                                                      | 1.878381 |
| AF041409 | integrin alpha 8(Itga8)                                                                      | 1.626303 |

|          |                                                                          |          |
|----------|--------------------------------------------------------------------------|----------|
| AF041886 | No data                                                                  | 1.709967 |
| AF041944 | No data                                                                  | 2.115703 |
| AF041951 | No data                                                                  | 2.188502 |
| AF041952 | No data                                                                  | 1.752747 |
| AF042360 | olfactory receptor 1355(Olfr1355)                                        | 1.646869 |
| AF044225 | No data                                                                  | 1.733827 |
| AF050418 | No data                                                                  | 1.630342 |
| AF050423 | No data                                                                  | 1.776472 |
| AF056214 | No data                                                                  | 1.68233  |
| AF056972 | guanine nucleotide binding protein, alpha z subunit(Gnaz)                | 1.641311 |
| AF062756 | No data                                                                  | 1.9313   |
| AF071430 | E1A binding protein p300(Ep300)                                          | 1.911047 |
| AF089721 | smoothened, frizzled class receptor(Smo)                                 | 2.044198 |
| AF090373 | gamma-aminobutyric acid (GABA) A receptor, subunit alpha 4(Gabra4)       | 1.79195  |
| AF092039 | steroid receptor RNA activator 1(Sra1)                                   | 1.502531 |
| AF092093 | adaptor-related protein complex AP-4, sigma 1(Ap4s1)                     | 1.625098 |
| AF092507 | dipeptidylpeptidase 6(Dpp6)                                              | 1.526619 |
| AF093549 | No data                                                                  | 1.872212 |
| AF093552 | No data                                                                  | 1.52908  |
| AF093563 | No data                                                                  | 1.826298 |
| AF093864 | No data                                                                  | 2.410693 |
| AF102519 | olfactory receptor 45(Olfr45)                                            | 1.87788  |
| AF104984 | No data                                                                  | 2.170897 |
| AF107018 | No data                                                                  | 1.512219 |
| AF108462 | eukaryotic translation initiation factor 6(Eif6)                         | 2.804366 |
| AF115339 | Lck interacting transmembrane adaptor 1(Lime1)                           | 1.508149 |
| AF117831 | integrin-linked kinase-associated serine/threonine phosphatase 2C(Ilkap) | 1.509532 |
| AF120469 | No data                                                                  | 1.718085 |
| AF121080 | solute carrier family 15, member 3(Slc15a3)                              | 1.524148 |
| AF123263 | phenylalanyl-tRNA synthetase, beta subunit(Farsb)                        | 1.583831 |
| AF129888 | eukaryotic translation initiation factor 1(Eif1)                         | 2.70488  |
| AF130313 | NCK interacting protein with SH3 domain(Nckipsd)                         | 1.983926 |
| AF143687 | No data                                                                  | 1.898327 |
| AF144899 | No data                                                                  | 1.819103 |
| AF144900 | No data                                                                  | 1.678695 |
| AF144975 | immunoglobulin heavy chain (J558 family)(Igh-VJ558)                      | 1.58637  |
| AF150755 | microtubule-actin crosslinking factor 1(Macf1)                           | 1.839097 |
| AF178531 | ropporin, rrophilin associated protein 1(Ropn1)                          | 2.319185 |
| AF178751 | olfactory receptor 2(Olfr2)                                              | 2.630375 |

|          |                                                                                                       |          |
|----------|-------------------------------------------------------------------------------------------------------|----------|
| AF179425 | GATA binding protein 6(Gata6)                                                                         | 1.814614 |
| AF182945 | SRY (sex determining region Y)-box 15(Sox15)                                                          | 2.014908 |
| AF188180 | No data                                                                                               | 2.049846 |
| AF189817 | pleckstrin homology domain containing, family B (evectins) member 2(Plekha2)                          | 1.557045 |
| AF192525 | cytohesin 1 interacting protein(Cytip)                                                                | 2.452069 |
| AF193435 | SRY (sex determining region Y)-box 14(Sox14)                                                          | 1.592429 |
| AF210283 | No data                                                                                               | 2.045455 |
| AF217002 | two pore channel 1(Tpcn1)                                                                             | 1.713081 |
| AF217188 | Yip1 domain family, member 7(Yipf7)                                                                   | 1.817842 |
| AF220033 | tripartite motif-containing 7(Trim7)                                                                  | 1.556225 |
| AF220154 | No data                                                                                               | 1.674533 |
| AF221095 | N-deacetylase/N-sulfotransferase (heparan glucosaminyl) 3(Ndst3)                                      | 2.316668 |
| AF221104 | No data                                                                                               | 2.403912 |
| AF225707 | NFKB inhibitor interacting Ras-like protein 1(Nkiras1)                                                | 1.815041 |
| AF233322 | solute carrier family 30 (zinc transporter), member 7(Slc30a7)                                        | 3.043332 |
| AF237628 | leiomodin 2 (cardiac)(Lmod2)                                                                          | 1.799919 |
| AF242214 | No data                                                                                               | 2.255846 |
| AF242218 | No data                                                                                               | 1.705921 |
| AF245444 | glutamate receptor, ionotropic, kainate 3(Grik3)                                                      | 1.647822 |
| AF263460 | solute carrier family 30 (zinc transporter), member 9(Slc30a9)                                        | 2.004339 |
| AF265684 | No data                                                                                               | 2.038418 |
| AF273672 | importin 9(Ipo9)                                                                                      | 1.509034 |
| AF276425 | signal peptide, CUB domain, EGF-like 1(Scube1)                                                        | 2.431361 |
| AF276872 | solute carrier family 5 (choline transporter), member 7(Slc5a7)                                       | 1.910837 |
| AF282272 | No data                                                                                               | 1.763456 |
| AF282277 | No data                                                                                               | 1.996543 |
| AF282730 | tissue inhibitor of metalloproteinase 4(Timp4)                                                        | 1.611827 |
| AF286161 | pleckstrin homology domain-containing, family A (phosphoinositide binding specific) member 2(Plekha2) | 1.746384 |
| AF286212 | armadillo repeat gene deleted in velo-cardio-facial syndrome(Arvcf)                                   | 1.82658  |
| AF291488 | No data                                                                                               | 1.722636 |
| AF291496 | No data                                                                                               | 1.638444 |
| AF291503 | No data                                                                                               | 1.598848 |
| AF291722 | No data                                                                                               | 1.704793 |
| AF291821 | nuclear receptor subfamily 1, group D, member 1(Nr1d1)                                                | 2.083866 |
| AF298810 | ATPase, H <sup>+</sup> transporting, lysosomal V1 subunit D(Atp6v1d)                                  | 1.593443 |
| AF301152 | chromosome segregation 1-like ( <i>S. cerevisiae</i> )(Cse1l)                                         | 1.577029 |
| AF305425 | protease, serine 29(Prss29)                                                                           | 1.615934 |

|          |                                                                                                                               |          |
|----------|-------------------------------------------------------------------------------------------------------------------------------|----------|
| AF309565 | potassium voltage-gated channel, subfamily H (eag-related), member 5(Kcnh5)                                                   | 1.576903 |
| AF320615 | No data                                                                                                                       | 1.575311 |
| AF322194 | cleavage stimulation factor, 3' pre-RNA subunit 2, tau(Cstf2t)                                                                | 1.601487 |
| AF325532 | glucuronyl C5-epimerase(Glce)                                                                                                 | 1.599447 |
| AF326300 | protocadherin beta 7(Pcdhb7)                                                                                                  | 1.903819 |
| AF326303 | No data                                                                                                                       | 1.832402 |
| AF331457 | RAS guanyl releasing protein 4(Rasgrp4)                                                                                       | 2.107184 |
| AF336345 | No data                                                                                                                       | 2.165069 |
| AF338424 | nudix (nucleoside diphosphate linked moiety X)-type motif 7(Nudt7)                                                            | 1.80504  |
| AF354708 | mitochondrial fission regulator 1(Mtfr1)                                                                                      | 1.698218 |
| AF357325 | small nucleolar RNA, C/D box 88C(Snord88c)                                                                                    | 2.01108  |
| AF357389 | small nucleolar RNA, H/ACA box 30(Snora30)                                                                                    | 1.797737 |
| AF357392 | predicted gene 12238(Gm12238)                                                                                                 | 1.729773 |
| AF357461 | No data                                                                                                                       | 1.944685 |
| AF357499 | No data                                                                                                                       | 1.860167 |
| AF360543 | carbohydrate sulfotransferase 10(Chst10)                                                                                      | 1.635831 |
| AF363030 | O-linked N-acetylglucosamine (GlcNAc) transferase (UDP-N-acetylglucosamine:polypeptide-N-acetylglucosaminyl transferase)(Ogt) | 2.107756 |
| AF369894 | No data                                                                                                                       | 2.245162 |
| AF387809 | SNF related kinase(Snrk)                                                                                                      | 1.716668 |
| AF412298 | LYR motif containing 5(Lyrm5)                                                                                                 | 1.511218 |
| AF419324 | calcium binding protein 7(Cabp7)                                                                                              | 1.689972 |
| AI840604 | No data                                                                                                                       | 1.819067 |
| AJ001379 | testis specific protein-Y encoded, pseudogene(Tspy-ps)                                                                        | 2.203435 |
| AJ005120 | B cell translocation gene 4(Btg4)                                                                                             | 1.60879  |
| AJ007376 | DEAD (Asp-Glu-Ala-Asp) box polypeptide 3, Y-linked(Ddx3y)                                                                     | 2.054269 |
| AJ011080 | afamin(Afm)                                                                                                                   | 1.784118 |
| AJ231215 | No data                                                                                                                       | 1.595552 |
| AJ245477 | No data                                                                                                                       | 2.784866 |
| AJ249354 | endothelial cell-specific molecule 1(Esm1)                                                                                    | 1.891613 |
| AJ275989 | Kruppel like factor 11(KLF11)                                                                                                 | 1.626952 |
| AJ276796 | cysteinyl-tRNA synthetase(Cars)                                                                                               | 1.669579 |
| AJ278787 | sodium channel, voltage-gated, type IV, alpha(Scn4a)                                                                          | 2.639349 |
| AJ279831 | No data                                                                                                                       | 1.906614 |
| AJ279846 | small integral membrane protein 11(Smim11)                                                                                    | 2.020682 |
| AJ290945 | predicted gene 10401(Gm10401)                                                                                                 | 1.942669 |
| AJ293592 | laminin, alpha 3(Lama3)                                                                                                       | 2.366763 |
| AJ307527 | No data                                                                                                                       | 1.539362 |

|          |                                                                                                     |          |
|----------|-----------------------------------------------------------------------------------------------------|----------|
| AJ344342 | integrin alpha 9(Itga9)                                                                             | 1.718521 |
| AJ404616 | fructosamine 3 kinase(Fn3k)                                                                         | 1.920171 |
| AK002226 | Ly6/Plaur domain containing 2(Ly6d2)                                                                | 1.701963 |
| AK002346 | caspase recruitment domain family, member 11(Card11)                                                | 2.150704 |
| AK002462 | succinate dehydrogenase complex assembly factor 1(Sdhaf1)                                           | 1.602065 |
| AK002584 | homogentisate 1, 2-dioxygenase(Hgd)                                                                 | 1.948924 |
| AK002663 | RIKEN cDNA 0610025J13 gene(0610025J13Rik)                                                           | 1.731204 |
| AK002706 | zinc finger protein 414(Zfp414)                                                                     | 1.602463 |
| AK002936 | iron-sulfur cluster assembly 2(Isca2)                                                               | 1.784313 |
| AK002958 | glutamate receptor, metabotropic 3(Grm3)                                                            | 1.557527 |
| AK003088 | carboxypeptidase A1, pancreatic(Cpa1)                                                               | 1.506056 |
| AK003201 | transmembrane protein 126B(Tmem126b)                                                                | 1.832918 |
| AK003211 | collagen, type VI, alpha 4(Col6a4)                                                                  | 1.814788 |
| AK003230 | phosphatidylinositol 3-kinase, catalytic, beta polypeptide(Pik3cb)                                  | 1.726165 |
| AK003741 | PDZ domain containing RING finger 4(Pdzrn4)                                                         | 1.583884 |
| AK003802 | timeless interacting protein(Tipin)                                                                 | 1.640504 |
| AK003823 | carboxypeptidase A4(Cpa4)                                                                           | 1.908478 |
| AK003881 | ubiquinol-cytochrome c reductase, complex III subunit X(Uqcr10)                                     | 1.718048 |
| AK003919 | trans-acting transcription factor 6(Sp6)                                                            | 1.671689 |
| AK003950 | leucine rich adaptor protein 1-like(Lurap1l)                                                        | 1.554121 |
| AK004000 | ring finger protein 166(Rnf166)                                                                     | 1.585488 |
| AK004132 | prolyl 3-hydroxylase family member 4 (non-enzymatic)(P3h4)                                          | 1.861352 |
| AK004146 | ras responsive element binding protein 1(Rreb1)                                                     | 1.74663  |
| AK004173 | tRNA methyltransferase 61B(Trmt61b)                                                                 | 1.533855 |
| AK004374 | RIKEN cDNA 1110065H08 gene(1110065H08Rik)                                                           | 1.528485 |
| AK004394 | LRRN4 C-terminal like(Lrrn4cl)                                                                      | 2.24744  |
| AK004402 | inhibitor of kappa light polypeptide enhancer in B cells, kinase complex-associated protein(Ikbpap) | 1.647603 |
| AK004559 | copine VIII(Cpne8)                                                                                  | 1.546938 |
| AK004641 | RNA binding motif protein 7(Rbm7)                                                                   | 2.500385 |
| AK004755 | dimethylglycine dehydrogenase precursor(Dmgdh)                                                      | 1.918071 |
| AK004794 | MAM domain containing 2(Mamdc2)                                                                     | 2.145328 |
| AK004823 | jade family PHD finger 2(Jade2)                                                                     | 1.509046 |
| AK004912 | dual specificity phosphatase 23(Dusp23)                                                             | 2.203791 |
| AK005035 | RIKEN cDNA 1300017J02 gene(1300017J02Rik)                                                           | 1.796511 |
| AK005085 | serine/arginine repetitive matrix 4(Srrm4)                                                          | 1.857475 |
| AK005134 | fumarylacetoacetate hydrolase domain containing 2A(Fahd2a)                                          | 1.538539 |
| AK005139 | 1-acylglycerol-3-phosphate O-acyltransferase (lysophosphatidic acid acyltransferase, delta)(Agpat4) | 2.106024 |
| AK005182 | solute carrier family 35, member F2(Slc35f2)                                                        | 1.61886  |

|          |                                                          |          |
|----------|----------------------------------------------------------|----------|
| AK005229 | mitochondrial ribosomal protein S28(Mrps28)              | 1.695021 |
| AK005260 | sympleskin(Sympk)                                        | 1.585364 |
| AK005500 | fibronectin type III domain containing 3B(Fndc3b)        | 2.183732 |
| AK005643 | RIKEN cDNA 1700003I22 gene(1700003I22Rik)                | 2.789772 |
| AK005650 | cilia and flagella associated protein 206(Cfap206)       | 1.640501 |
| AK005676 | RIKEN cDNA 1700006H20 gene(1700006H20Rik)                | 4.125787 |
| AK005693 | RIKEN cDNA 1700007B14 gene(1700007B14Rik)                | 2.267079 |
| AK005726 | RIKEN cDNA 4930522H14 gene(4930522H14Rik)                | 1.539103 |
| AK005727 | RIKEN cDNA 1700007J24 gene(1700007J24Rik)                | 2.130732 |
| AK005734 | IQ motif containing F5(lqcf5)                            | 1.621547 |
| AK005775 | ankyrin repeat domain 36(Ankrd36)                        | 2.335693 |
| AK005883 | outer dense fiber of sperm tails 3(Odf3)                 | 2.011179 |
| AK005887 | solute carrier family 38, member 4(Slc38a4)              | 1.555128 |
| AK005944 | arrestin domain containing 5(Arrdc5)                     | 1.769347 |
| AK005951 | mediator complex subunit 9, opposite strand(Med9os)      | 1.930905 |
| AK005964 | RIKEN cDNA 1700013M08 gene(1700013M08Rik)                | 1.705913 |
| AK005990 | RIKEN cDNA 1700015E13 gene(1700015E13Rik)                | 1.554604 |
| AK006032 | RIKEN cDNA 1700016H03 gene(1700016H03Rik)                | 1.977317 |
| AK006048 | maestro heat-like repeat family member 4(Mroh4)          | 2.784754 |
| AK006143 | family with sequence similarity 187, member B(Fam187b)   | 1.599531 |
| AK006229 | family with sequence similarity 71, member E1(Fam71e1)   | 2.067917 |
| AK006235 | RIKEN cDNA 1700022C07 gene(1700022C07Rik)                | 1.612571 |
| AK006275 | BTB (POZ) domain containing 9(Btbd9)                     | 1.792669 |
| AK006325 | RIKEN cDNA 1700025C18 gene(1700025C18Rik)                | 1.872216 |
| AK006349 | zinc finger protein 169(Zfp169)                          | 1.627059 |
| AK006376 | RIKEN cDNA 1700026D11 gene(1700026D11Rik)                | 1.893852 |
| AK006410 | spermatogenesis and centriole associated 1 like(Spatc1l) | 1.861986 |
| AK006451 | RIKEN cDNA 1700028D13 gene(1700028D13Rik)                | 2.530145 |
| AK006454 | RIKEN cDNA 1700028E10 gene(1700028E10Rik)                | 1.624613 |
| AK006500 | RIKEN cDNA 1700029J03 gene(1700029J03Rik)                | 1.866827 |
| AK006511 | DPY30 domain containing 1(Dydc1)                         | 2.219303 |
| AK006525 | islet cell autoantigen 1-like(lca1l)                     | 1.652432 |
| AK006539 | RIKEN cDNA 1700088E04 gene(1700088E04Rik)                | 1.592139 |
| AK006620 | RIKEN cDNA 1700037F03 gene(1700037F03Rik)                | 1.836786 |
| AK006658 | protease-associated domain containing 1(Pradc1)          | 2.120415 |
| AK006681 | RIKEN cDNA 1700042D02 gene(1700042D02Rik)                | 1.648875 |
| AK006768 | No data                                                  | 1.642216 |
| AK006833 | RIKEN cDNA 1700058M10 gene(1700058M10Rik)                | 1.541211 |
| AK006845 | RIKEN cDNA 1700055K11 gene(1700055K11Rik)                | 1.794847 |
| AK006867 | heat shock protein 12A(Hspa12a)                          | 1.54721  |
| AK006889 | RIKEN cDNA 1700065D16 gene(1700065D16Rik)                | 2.276044 |

|          |                                                                                          |          |
|----------|------------------------------------------------------------------------------------------|----------|
| AK006929 | claudin domain containing 2(Cldnd2)                                                      | 1.535897 |
| AK006948 | RIKEN cDNA 1700074I03 gene(1700074I03Rik)                                                | 1.532991 |
| AK006955 | RIKEN cDNA 1700080G11 gene(1700080G11Rik)                                                | 1.808929 |
| AK006961 | RIKEN cDNA 1700081B01 gene(1700081B01Rik)                                                | 1.619328 |
| AK007010 | antizyme inhibitor 1(Azin1)                                                              | 2.181233 |
| AK007031 | ST8 alpha-N-acetyl-neuraminide alpha-2,8-sialyltransferase 3, opposite strand(St8sia3os) | 2.03261  |
| AK007167 | tubulin tyrosine ligase-like family, member 13(Ttll13)                                   | 1.726441 |
| AK007211 | RIKEN cDNA 1700120C18 gene(1700120C18Rik)                                                | 1.502819 |
| AK007281 | RIKEN cDNA 1700125H20 gene(1700125H20Rik)                                                | 2.509887 |
| AK007311 | RIKEN cDNA 1700128I11 gene(1700128I11Rik)                                                | 3.078571 |
| AK007323 | required for meiotic nuclear division 1 homolog(Rmnd1)                                   | 2.119015 |
| AK007329 | THAP domain containing 7(Thap7)                                                          | 1.547505 |
| AK007484 | autophagy related 7(Atg7)                                                                | 1.56354  |
| AK007491 | EBNA1 binding protein 2(Ebna1bp2)                                                        | 2.503531 |
| AK007710 | gasdermin D(Gsdmd)                                                                       | 1.901085 |
| AK007903 | RIKEN cDNA 1810059C17 gene(1810059C17Rik)                                                | 1.846011 |
| AK007933 | RIKEN cDNA 1810062G17 gene(1810062G17Rik)                                                | 1.74293  |
| AK007956 | RIKEN cDNA 1810065E05 gene(1810065E05Rik)                                                | 1.82405  |
| AK008234 | glucosaminyl (N-acetyl) transferase 3, mucin type(Gcnt3)                                 | 3.163266 |
| AK008384 | RIKEN cDNA 2010110K18 gene(2010110K18Rik)                                                | 1.532156 |
| AK008458 | Hermansky-Pudlak syndrome 4(Hps4)                                                        | 1.892595 |
| AK008485 | RIKEN cDNA 2010300C02 gene(2010300C02Rik)                                                | 1.710668 |
| AK008596 | RIKEN cDNA 2010320M18 gene(2010320M18Rik)                                                | 2.007688 |
| AK008699 | major facilitator superfamily domain containing 6(Mfsd6)                                 | 2.159158 |
| AK008793 | cytidine deaminase(Cda)                                                                  | 1.698038 |
| AK008817 | RUN and SH3 domain containing 1(Rusc1)                                                   | 1.51645  |
| AK008937 | RIKEN cDNA 2210415C06 gene(2210415C06Rik)                                                | 1.927746 |
| AK008974 | lipase, family member N(Lipn)                                                            | 1.78363  |
| AK009282 | LY6/PLAUR domain containing 6B(Lypd6b)                                                   | 1.633243 |
| AK009341 | transmembrane protein 110(Tmem110)                                                       | 2.206224 |
| AK009366 | RIKEN cDNA 2310015K22 gene(2310015K22Rik)                                                | 1.515712 |
| AK009370 | coiled-coil domain containing 90B(Ccdc90b)                                               | 1.580515 |
| AK009547 | NADH dehydrogenase (ubiquinone) complex I, assembly factor 6(Ndufaf6)                    | 1.977428 |
| AK009550 | family with sequence similarity 89, member A(Fam89a)                                     | 2.148088 |
| AK010077 | ARP1 actin-related protein 1B, contractin beta(Actr1b)                                   | 1.576766 |
| AK010104 | RIKEN cDNA 2310068C19 gene(2310068C19Rik)                                                | 2.070775 |
| AK010322 | RNA pseudouridylate synthase domain containing 4(Rpusd4)                                 | 1.837925 |
| AK010447 | SET and MYND domain containing 3(Smyd3)                                                  | 2.069024 |
| AK010586 | RIKEN cDNA 2410024N13 gene(2410024N13Rik)                                                | 1.665654 |

|          |                                                                               |          |
|----------|-------------------------------------------------------------------------------|----------|
| AK010692 | ribosomal protein L35A(Rpl35a)                                                | 1.642842 |
| AK010715 | histone aminotransferase 1(Hat1)                                              | 2.520901 |
| AK010752 | NADH dehydrogenase (ubiquinone) 1 alpha subcomplex assembly factor 7(Ndufaf7) | 2.418831 |
| AK010807 | PHD finger protein 12(Phf12)                                                  | 1.623137 |
| AK010925 | transforming growth factor beta regulated gene 1(Tbrg1)                       | 1.953464 |
| AK011086 | proline-rich Gla (G-carboxyglutamic acid) polypeptide 2(Prrg2)                | 2.189775 |
| AK011092 | RIKEN cDNA 2510042H12 gene(2510042H12Rik)                                     | 1.833077 |
| AK011186 | coiled-coil domain containing 9(Ccdc9)                                        | 1.585087 |
| AK011234 | HIV TAT specific factor 1(Htatsf1)                                            | 2.027345 |
| AK011240 | transmembrane protein 88(Tmem88)                                              | 1.640749 |
| AK011292 | RIKEN cDNA 2610002J23 gene(2610002J23Rik)                                     | 1.567167 |
| AK011527 | RIKEN cDNA 2610024D14 gene(2610024D14Rik)                                     | 2.387056 |
| AK011538 | RIKEN cDNA 2610024L02 gene(2610024L02Rik)                                     | 2.146452 |
| AK011565 | RIKEN cDNA 2610027F03 gene(2610027F03Rik)                                     | 1.8372   |
| AK011672 | PDZ and pleckstrin homology domains 1(Pdzph1)                                 | 1.574424 |
| AK011747 | mahogunin, ring finger 1(Mgrn1)                                               | 2.548445 |
| AK011762 | phosphatidylinositol glycan anchor biosynthesis, class W(Pigw)                | 1.958822 |
| AK011879 | ATPase family, AAA domain containing 3A, opposite strand(Atad3aos)            | 1.574329 |
| AK011892 | phospholipase C, delta 3(Plcd3)                                               | 1.514564 |
| AK011901 | tripartite motif-containing 71(Trim71)                                        | 1.634376 |
| AK011967 | lysophosphatidic acid receptor 6(Lpar6)                                       | 2.443774 |
| AK011986 | zinc finger protein 979(Zfp979)                                               | 1.792253 |
| AK012008 | RIKEN cDNA 2610311E24 gene(2610311E24Rik)                                     | 1.519732 |
| AK012019 | N-6 adenine-specific DNA methyltransferase 1 (putative)(N6amt1)               | 2.155951 |
| AK012020 | RIKEN cDNA 1700003G18 gene(1700003G18Rik)                                     | 1.685568 |
| AK012046 | kelch-like 22(Klhl22)                                                         | 1.744652 |
| AK012110 | lipin 2(Lpin2)                                                                | 2.199863 |
| AK012143 | mitochondrial ribosomal protein L55(Mrpl55)                                   | 1.548675 |
| AK012160 | heterogeneous nuclear ribonucleoprotein R(Hnrnpr)                             | 1.80309  |
| AK012172 | coiled-coil domain containing 25(Ccdc25)                                      | 1.973264 |
| AK012199 | zinc finger, HIT domain containing 1(Znhit1)                                  | 1.616048 |
| AK012213 | aldehyde dehydrogenase 1 family, member B1(Aldh1b1)                           | 1.559737 |
| AK012262 | CKLF-like MARVEL transmembrane domain containing 8(Cmtm8)                     | 1.577835 |
| AK012330 | terminal uridylyl transferase 1, U6 snRNA-specific(Tut1)                      | 1.626376 |
| AK012436 | adenylate cyclase 7(Adcy7)                                                    | 2.34876  |
| AK012506 | RIKEN cDNA 2700069I18 gene(2700069I18Rik)                                     | 1.837801 |



|          |                                                                                              |          |
|----------|----------------------------------------------------------------------------------------------|----------|
| AK012547 | structural maintenance of chromosomes 2, opposite strand(Smc2os)                             | 1.631048 |
| AK012608 | cutA divalent cation tolerance homolog(Cuta)                                                 | 1.698536 |
| AK012668 | tripartite motif-containing 37(Trim37)                                                       | 1.829118 |
| AK012700 | DNA segment, Chr 3, ERATO Doi 751, expressed(D3Ertd751e)                                     | 1.954114 |
| AK012724 | family with sequence similarity 53, member C(Fam53c)                                         | 1.660017 |
| AK012903 | mediator complex subunit 18(Med18)                                                           | 1.579772 |
| AK012938 | transmembrane protein 107(Tmem107)                                                           | 3.479813 |
| AK012940 | exocyst complex component 3(Exoc3)                                                           | 1.915673 |
| AK013021 | RIKEN cDNA 2810407A14 gene(2810407A14Rik)                                                    | 1.932619 |
| AK013039 | zinc finger protein 746(Zfp746)                                                              | 1.894496 |
| AK013202 | transcriptional regulator, SIN3B (yeast)(Sin3b)                                              | 2.550369 |
| AK013206 | poly (ADP-ribose) polymerase family, member 8(Parp8)                                         | 1.505219 |
| AK013297 | diphthamine biosynthesis 7(Dph7)                                                             | 1.794572 |
| AK013368 | tetratricopeptide repeat domain 19(Ttc19)                                                    | 1.564588 |
| AK013478 | rabphilin 3A(Rph3a)                                                                          | 1.663827 |
| AK013551 | RIKEN cDNA 2900018K06 gene(2900018K06Rik)                                                    | 1.75814  |
| AK013628 | RIKEN cDNA 2900040J22 gene(2900040J22Rik)                                                    | 1.613934 |
| AK013649 | SET domain containing 5(Setd5)                                                               | 1.923265 |
| AK013743 | RIKEN cDNA 2900063K03 gene(2900063K03Rik)                                                    | 1.707675 |
| AK013816 | RIKEN cDNA 2900084C01 gene(2900084C01Rik)                                                    | 2.21492  |
| AK013860 | T cell lymphoma invasion and metastasis 2(Tiam2)                                             | 2.541238 |
| AK014112 | refilin A(Rflna)                                                                             | 1.562733 |
| AK014221 | BMP-binding endothelial regulator(Bmper)                                                     | 1.680242 |
| AK014260 | nucleoporin 54(Nup54)                                                                        | 1.623253 |
| AK014270 | patched domain containing 4(Ptchd4)                                                          | 1.890689 |
| AK014355 | No data                                                                                      | 1.532901 |
| AK014427 | NIPA-like domain containing 1(Nipal1)                                                        | 1.840884 |
| AK014598 | peroxisomal biogenesis factor 26(Pex26)                                                      | 1.676366 |
| AK014727 | RIKEN cDNA 4833419G08 gene(4833419G08Rik)                                                    | 1.855328 |
| AK014804 | RNA pseudouridylate synthase domain containing 2(Rpusd2)                                     | 1.568187 |
| AK014807 | purinergic receptor P2Y, G-protein coupled 12(P2ry12)                                        | 1.706893 |
| AK014809 | solute carrier family 22 (organic cation transporter), member 16(Slc22a16)                   | 2.09863  |
| AK014814 | RIKEN cDNA 4921504P05 gene(4921504P05Rik)                                                    | 1.666604 |
| AK014834 | thioesterase superfamily member 4(Them4)                                                     | 1.980989 |
| AK014841 | solute carrier family 36 (proton/amino acid symporter), member 1, opposite strand(Slc36a1os) | 1.510822 |
| AK014863 | von Willebrand factor A domain containing 3B(Vwa3b)                                          | 1.811757 |
| AK014907 | RIKEN cDNA 4921517D16 gene(4921517D16Rik)                                                    | 1.588234 |
| AK014913 | speckle-type POZ protein-like(Spopl)                                                         | 1.61146  |

|          |                                                                                                                 |          |
|----------|-----------------------------------------------------------------------------------------------------------------|----------|
| AK015031 | RIKEN cDNA 4930401C12 gene(4930401C12Rik)                                                                       | 1.652309 |
| AK015047 | RIKEN cDNA 4930402F06 gene(4930402F06Rik)                                                                       | 1.942398 |
| AK015074 | 3-phosphoglycerate dehydrogenase pseudogene(Gm8096)                                                             | 1.800275 |
| AK015093 | RIKEN cDNA 4930405D01 gene(4930405D01Rik)                                                                       | 1.879857 |
| AK015127 | RIKEN cDNA 4930413E15 gene(4930413E15Rik)                                                                       | 1.725197 |
| AK015155 | RIKEN cDNA 4930415O20 gene(4930415O20Rik)                                                                       | 1.743582 |
| AK015184 | RIKEN cDNA 4930422N03 gene(4930422N03Rik)                                                                       | 1.734819 |
| AK015186 | RIKEN cDNA 4930423C22 gene(4930423C22Rik)                                                                       | 1.839592 |
| AK015262 | adenylate cyclase 10(Adcy10)                                                                                    | 1.821015 |
| AK015294 | RIKEN cDNA 4930432L08 gene(4930432L08Rik)                                                                       | 1.693769 |
| AK015340 | complement component 8, beta polypeptide(C8b)                                                                   | 1.524772 |
| AK015604 | RIKEN cDNA 4930481A15 gene(4930481A15Rik)                                                                       | 2.408826 |
| AK015616 | RIKEN cDNA 4930483K19 gene(4930483K19Rik)                                                                       | 1.866562 |
| AK015635 | RIKEN cDNA 4930486L24 gene(4930486L24Rik)                                                                       | 2.411066 |
| AK015655 | zinc finger protein 184 (Kruppel-like)(Zfp184)                                                                  | 2.045468 |
| AK015748 | RIKEN cDNA 4930511C11 gene(4930511C11Rik)                                                                       | 1.71293  |
| AK015787 | RIKEN cDNA 4930513N24 gene(4930513N24Rik)                                                                       | 1.650562 |
| AK015932 | RIKEN cDNA 4930529F21 gene(4930529F21Rik)                                                                       | 1.614403 |
| AK015940 | RIKEN cDNA 4930529N20 gene(4930529N20Rik)                                                                       | 2.040532 |
| AK016115 | RIKEN cDNA 4930554C24 gene(4930554C24Rik)                                                                       | 1.558116 |
| AK016120 | RIKEN cDNA 4930554I06 gene(4930554I06Rik)                                                                       | 1.547433 |
| AK016125 | bol, boule-like (Drosophila)(Boll)                                                                              | 1.851724 |
| AK016149 | RIKEN cDNA 4930556L07 gene(4930556L07Rik)                                                                       | 1.82175  |
| AK016210 | RIKEN cDNA 4930563M21 gene(4930563M21Rik)                                                                       | 2.309248 |
| AK016308 | RIKEN cDNA 4930578M07 gene(4930578M07Rik)                                                                       | 1.725469 |
| AK016340 | glutathione S-transferase, theta 4(Gstt4)                                                                       | 1.503513 |
| AK016353 | IQ motif containing with AAA domain(Iqca)                                                                       | 1.580806 |
| AK016359 | ADP-ribosylation factor-like 5B(Arl5b)                                                                          | 1.542676 |
| AK016419 | SMC hinge domain containing 1(Smchd1)                                                                           | 1.787736 |
| AK016461 | Fancd2 opposite strand(Fancd2os)                                                                                | 2.06442  |
| AK016488 | RIKEN cDNA 4931429L15 gene(4931429L15Rik)                                                                       | 2.362828 |
| AK016530 | regulatory associated protein of MTOR, complex 1(Rptor)                                                         | 1.794909 |
| AK016532 | exocyst complex component 2(Exoc2)                                                                              | 1.539554 |
| AK016546 | dipeptidylpeptidase 8(Dpp8)                                                                                     | 1.656848 |
| AK016553 | heat shock transcription factor 2 binding protein(Hsf2bp)                                                       | 1.673152 |
| AK016591 | potassium large conductance calcium-activated channel, subfamily M, beta member 4, opposite strand 2(Kcnmb4os2) | 1.750693 |
| AK016596 | No data                                                                                                         | 2.140875 |
| AK016634 | leucine-rich repeats and IQ motif containing 3(Lrriq3)                                                          | 1.838038 |
| AK016640 | tousled-like kinase 2 (Arabidopsis)(Tlk2)                                                                       | 2.238412 |
| AK016657 | tetratricopeptide repeat domain 25(Ttc25)                                                                       | 2.200291 |

|          |                                                                                              |          |
|----------|----------------------------------------------------------------------------------------------|----------|
| AK016659 | sphingomyelin synthase 2(Sgms2)                                                              | 1.527716 |
| AK016685 | prolyl 4-hydroxylase, transmembrane (endoplasmic reticulum)(P4htm)                           | 2.27391  |
| AK016708 | zinc finger, X-linked, duplicated B(Zxdb)                                                    | 1.590938 |
| AK016728 | RIKEN cDNA 4933407K13 gene(4933407K13Rik)                                                    | 1.808216 |
| AK016769 | RIKEN cDNA 4933411E08 gene(4933411E08Rik)                                                    | 1.529111 |
| AK016772 | ubiquitin specific peptidase 46, opposite strand 2(Usp46os2)                                 | 1.562587 |
| AK016811 | NOL1/NOP2/Sun domain family member 6(Nsun6)                                                  | 2.299795 |
| AK016833 | RIKEN cDNA 4933416I08 gene(4933416I08Rik)                                                    | 1.779234 |
| AK016850 | golgi autoantigen, golgin subfamily a, 7B(Golga7b)                                           | 3.07309  |
| AK016892 | RIKEN cDNA 4933424G05 gene(4933424G05Rik)                                                    | 2.055432 |
| AK016978 | No data                                                                                      | 2.280411 |
| AK016990 | basic leucine zipper transcription factor, ATF-like 2(Batf2)                                 | 1.779355 |
| AK017007 | leucine rich repeat containing 2(Lrrc2)                                                      | 1.586057 |
| AK017087 | carboxypeptidase, vitellogenic-like(Cpvl)                                                    | 2.006278 |
| AK017132 | RIKEN cDNA 4930593A02 gene(4930593A02Rik)                                                    | 1.81949  |
| AK017133 | RIKEN cDNA 4933440J02 gene(4933440J02Rik)                                                    | 1.564027 |
| AK017145 | solute carrier family 38, member 2(Slc38a2)                                                  | 1.640589 |
| AK017147 | RIKEN cDNA 5033403F01 gene(5033403F01Rik)                                                    | 2.46563  |
| AK017226 | mitochondrial fission factor(Mff)                                                            | 1.568341 |
| AK017304 | BPI fold containing family B, member 9B(Bpifb9b)                                             | 1.936836 |
| AK017436 | bobby sox homolog (Drosophila)(Bbx)                                                          | 1.926974 |
| AK017459 | RIKEN cDNA 5530601H04 gene(5530601H04Rik)                                                    | 1.519419 |
| AK017569 | PCF11 cleavage and polyadenylation factor subunit(Pcf11)                                     | 2.013857 |
| AK017598 | glutaminy-peptide cyclotransferase (glutaminy cyclase)(Qpct)                                 | 2.139795 |
| AK017627 | tubulin polyglutamylase complex subunit 2(Tpgs2)                                             | 1.692787 |
| AK017664 | phosphoribosyl pyrophosphate amidotransferase(Ppat)                                          | 1.726607 |
| AK017676 | RIKEN cDNA 5730460C07 gene(5730460C07Rik)                                                    | 1.58776  |
| AK017706 | RIKEN cDNA 5730480H06 gene(5730480H06Rik)                                                    | 1.7586   |
| AK017782 | RIKEN cDNA 5730521K06 gene(5730521K06Rik)                                                    | 1.731332 |
| AK017801 | biphenyl hydrolase-like (serine hydrolase, breast epithelial mucin-associated antigen)(Bphl) | 3.339256 |
| AK018010 | RIKEN cDNA 5830454E08 gene(5830454E08Rik)                                                    | 2.271344 |
| AK018042 | RIKEN cDNA 5830468F06 gene(5830468F06Rik)                                                    | 1.705952 |
| AK018074 | RIKEN cDNA 6230400D17 gene(6230400D17Rik)                                                    | 1.500626 |
| AK018079 | zinc finger protein 444(Zfp444)                                                              | 1.835987 |
| AK018107 | RIKEN cDNA 6330403L08 gene(6330403L08Rik)                                                    | 1.652525 |
| AK018113 | angiopoietin-like 6(Angptl6)                                                                 | 1.976758 |
| AK018149 | nitric oxide synthase 1 (neuronal) adaptor protein(Nos1ap)                                   | 2.115101 |
| AK018196 | microphthalmia-associated transcription factor(Mitf)                                         | 1.852908 |
| AK018276 | RIKEN cDNA 6430411K18 gen(6430411K18Rik)                                                     | 1.578977 |

|          |                                                                  |          |
|----------|------------------------------------------------------------------|----------|
| AK018287 | No data                                                          | 1.629553 |
| AK018303 | RIKEN cDNA 6430710M23 gene(6430710M23Rik)                        | 1.589828 |
| AK018322 | renalase, FAD-dependent amine oxidase(Rnls)                      | 1.904872 |
| AK018417 | RIKEN cDNA 8430408J09 gene(8430408J09Rik)                        | 1.889705 |
| AK018454 | RIKEN cDNA 8430434A19 gene(8430434A19Rik)                        | 2.007445 |
| AK018513 | RIKEN cDNA 9030417H13 gene(9030417H13Rik)                        | 1.790459 |
| AK018521 | RIKEN cDNA 9030420N05 gene(9030420N05Rik)                        | 2.051018 |
| AK018547 | RIKEN cDNA 9030612E09 gene(9030612E09Rik)                        | 1.705947 |
| AK018600 | RIKEN cDNA 9130007G19 gene(9130007G19Rik)                        | 2.174445 |
| AK018606 | SUMO/sentrin specific peptidase 8(Senp8)                         | 1.641247 |
| AK018607 | RIKEN cDNA 9130011E15 gene(9130011E15Rik)                        | 1.670512 |
| AK018667 | RIKEN cDNA 9130410C08 gene(9130410C08Rik)                        | 1.731488 |
| AK018888 | WAP four-disulfide core domain 15A(Wfdc15a)                      | 2.219984 |
| AK018971 | RIKEN cDNA 1700121C08 gene(1700121C08Rik)                        | 3.389349 |
| AK019148 | ski sarcoma viral oncogene homolog (avian)(Ski)                  | 1.568621 |
| AK019167 | coiled-coil domain containing 88B(Ccdc88b)                       | 2.180522 |
| AK019313 | RIKEN cDNA 2900011L18 gene(2900011L18Rik)                        | 1.8648   |
| AK019376 | potassium channel, subfamily K, member 10(Kcnk10)                | 2.149488 |
| AK019450 | protein tyrosine phosphatase, receptor type, B(Ptprb)            | 1.55205  |
| AK019469 | neurexophilin and PC-esterase domain family, member 2(Nxpe2)     | 1.599703 |
| AK019493 | No data                                                          | 1.734328 |
| AK019516 | CAP-GLY domain containing linker protein family, member 4(Clip4) | 1.515611 |
| AK019652 | RIKEN cDNA 2410141K09 gene(2410141K09Rik)                        | 1.667285 |
| AK019707 | RIKEN cDNA 4930528H21 gene(4930528H21Rik)                        | 1.664331 |
| AK019735 | SPHK1 interactor, AKAP domain containing(Sphkap)                 | 2.017763 |
| AK019736 | RIKEN cDNA 4930544I03 gene(4930544I03Rik)                        | 2.649876 |
| AK019744 | RIKEN cDNA 4930546C10 gene(4930546C10Rik)                        | 2.706262 |
| AK019839 | G1 to S phase transition pseudogene(4930594C11Rik)               | 1.73064  |
| AK019863 | small nuclear RNA activating complex, polypeptide 3(Snpsc3)      | 2.494937 |
| AK019969 | myosin, heavy polypeptide 10, non-muscle(Myh10)                  | 1.512444 |
| AK020001 | purinergic receptor P2Y, G-protein coupled 10(P2ry10)            | 1.965938 |
| AK020007 | RAB GTPase activating protein 1-like(Rabgap1l)                   | 1.814153 |
| AK020100 | G elongation factor, mitochondrial 2(Gfm2)                       | 2.476815 |
| AK020102 | ATR interacting protein(Atrip)                                   | 1.644727 |
| AK020166 | RIKEN cDNA 4930426I24 gene(4930426I24Rik)                        | 1.793149 |
| AK020176 | RIKEN cDNA 6720490N10 gene(6720490N10Rik)                        | 1.928417 |
| AK020193 | RIKEN cDNA 8030411F24 gene(8030411F24Rik)                        | 1.57194  |
| AK020204 | RIKEN cDNA 8030450C14 gene(8030450C14Rik)                        | 1.634209 |
| AK020221 | RIKEN cDNA 8030488J09 gene(8030488J09Rik)                        | 2.099087 |

|          |                                                                 |          |
|----------|-----------------------------------------------------------------|----------|
| AK020239 | RIKEN cDNA 8530402H02 gene(8530402H02Rik)                       | 1.538948 |
| AK020250 | synaptopodin(Synpo)                                             | 1.815358 |
| AK020251 | RIKEN cDNA 9030218A15 gene(9030218A15Rik)                       | 1.861787 |
| AK020281 | membrane bound O-acyltransferase domain containing 1(Mboat1)    | 1.613789 |
| AK020289 | RIKEN cDNA 9130230N09 gene(9130230N09Rik)                       | 1.896663 |
| AK020324 | binder of sperm protein homolog 2(Bsph2)                        | 1.579963 |
| AK020388 | RIKEN cDNA 9330179D12 gene(9330179D12Rik)                       | 2.111236 |
| AK020389 | lipoma HMGIC fusion partner-like 5(Lhfp15)                      | 1.851237 |
| AK020453 | RIKEN cDNA 9430032J07 gene(9430032J07Rik)                       | 1.702941 |
| AK020456 | RIKEN cDNA 9430034F23 gene(9430034F23Rik)                       | 2.512523 |
| AK020479 | RIKEN cDNA 9430068D22 gene(9430068D22Rik)                       | 1.744012 |
| AK020480 | RIKEN cDNA 9430069I07 gene(9430069I07Rik)                       | 1.808142 |
| AK020531 | RIKEN cDNA 9430099N05 gene(9430099N05Rik)                       | 2.344275 |
| AK020585 | RIKEN cDNA 9530034D02 gene(9530034D02Rik)                       | 1.626899 |
| AK020591 | ArfGAP with coiled-coil, ankyrin repeat and PH domains 2(Acap2) | 1.585477 |
| AK020592 | RIKEN cDNA 9530039L23 gene(9530039L23Rik)                       | 2.188423 |
| AK020606 | epsin 2(Epn2)                                                   | 1.614815 |
| AK020667 | helicase with zinc finger domain(Helz)                          | 2.07603  |
| AK020737 | DC-STAMP domain containing 1(Dcst1)                             | 1.611503 |
| AK020764 | Mir142 host gene (non-protein coding)(Mir142hg)                 | 1.53494  |
| AK020777 | coiled coil domain containing 88A(Ccdc88a)                      | 1.995913 |
| AK020810 | cDNA sequence BC065403(BC065403)                                | 1.505533 |
| AK020837 | Src-like-adaptor 2(Sla2)                                        | 1.523799 |
| AK020893 | RIKEN cDNA A930026I22 gene(A930026I22Rik)                       | 1.76912  |
| AK020949 | RIKEN cDNA A930041D05 gene(A930041D05Rik)                       | 1.609226 |
| AK020989 | Ftx transcript, Xist regulator (non-protein coding)(Ftx)        | 1.517592 |
| AK021005 | AT rich interactive domain 1B (SWI-like)(Arid1b)                | 1.613678 |
| AK021036 | RIKEN cDNA C030001C17 gene(C030001C17Rik)                       | 1.578658 |
| AK021053 | RIKEN cDNA C030007D22 gene(C030007D22Rik)                       | 1.973215 |
| AK021221 | pyroglutamyl-peptidase I-like(Pgpep1l)                          | 1.865782 |
| AK021268 | RIKEN cDNA 1110065P20 gene(1110065P20Rik)                       | 1.789182 |
| AK021312 | RIKEN cDNA D530039A21 gene(D530039A21Rik)                       | 1.725407 |
| AK021369 | male-specific lethal 2 homolog (Drosophila)(Msl2)               | 1.618942 |
| AK021377 | RIKEN cDNA 9430065F17 gene(9430065F17Rik)                       | 1.619696 |
| AK021378 | RIKEN cDNA E130111B04 gene(E130111B04Rik)                       | 1.612976 |
| AL355704 | high mobility group 20A(Hmg20a)                                 | 1.582934 |
| AL355705 | high mobility group 20A(Hmg20a)                                 | 1.984422 |
| AL365329 | No data                                                         | 1.820902 |
| BC002127 | No data                                                         | 1.605697 |
| BC003203 | coiled-coil domain containing 117(Ccdc117)                      | 2.344656 |

|          |                                                                        |          |
|----------|------------------------------------------------------------------------|----------|
| BC003255 | MAP-kinase activating death domain(Madd)                               | 1.813066 |
| BC003286 | ankyrin repeat domain 13a(Ankrd13a)                                    | 1.673964 |
| BC003852 | CDP-diacylglycerol synthase (phosphatidate cytidyltransferase) 2(Cds2) | 1.515036 |
| BC003937 | erythrocyte membrane protein band 4.1 like 5(Epb41I5)                  | 1.800033 |
| BC003996 | multiple coagulation factor deficiency 2(Mcfd2)                        | 1.955501 |
| BC004055 | supervillin(Svil)                                                      | 1.882634 |
| BC004721 | ELL associated factor 2(Eaf2)                                          | 1.597402 |
| BC004736 | mitochondrial ribosomal protein L24(Mrpl24)                            | 2.419655 |
| BC004783 | grainyhead-like 2 (Drosophila)(Grhl2)                                  | 2.250955 |
| BC004827 | phosphoserine aminotransferase 1(Psat1)                                | 1.763433 |
| BC005529 | Ras and Rab interactor 2(Rin2)                                         | 1.513008 |
| BC005576 | ankyrin repeat domain 11(Ankrd11)                                      | 1.685155 |
| BC005603 | TATA-box binding protein associated factor 11(Taf11)                   | 1.913716 |
| BC005625 | mitochondrial rRNA methyltransferase 1(Mrm1)                           | 2.249159 |
| BC005716 | acylpeptide hydrolase(Apeh)                                            | 1.541698 |
| BC005766 | SEC14-like lipid binding 1(Sec14I1)                                    | 1.647472 |
| BC005799 | DEP domain containing 1a(Depdc1a)                                      | 2.386161 |
| BC006582 | protein tyrosine phosphatase, non-receptor type 23(Ptpn23)             | 2.263457 |
| BC006843 | DEAD (Asp-Glu-Ala-Asp) box polypeptide 47(Ddx47)                       | 1.570019 |
| BC006865 | protein disulfide isomerase associated 6(Pdia6)                        | 1.879524 |
| BC006877 | leucine rich repeat containing 59(Lrrc59)                              | 1.964232 |
| BC006938 | phosphatidylinositol glycan anchor biosynthesis, class C(Pigc)         | 1.692914 |
| BC007476 | zinc finger protein 790(Zfp790)                                        | 1.751752 |
| BC008110 | SH3 domain binding glutamic acid-rich protein-like 3(Sh3bgrl3)         | 2.184554 |
| BC008527 | phosphoglucomutase 2(Pgm2)                                             | 1.59054  |
| BC009090 | tumor necrosis factor, alpha-induced protein 8(Tnfaip8)                | 1.892168 |
| BC009147 | DEAH (Asp-Glu-Ala-His) box polypeptide 16(Dhx16)                       | 2.07375  |
| BC009156 | rho/rac guanine nucleotide exchange factor (GEF) 18(Arhgef18)          | 1.519715 |
| BC010583 | mannoside acetylglucosaminyltransferase 2(Mgat2)                       | 1.720976 |
| BC010717 | lysine (K)-specific demethylase 5A(Kdm5a)                              | 2.127603 |
| BC011093 | inositol (myo)-1(or 4)-monophosphatase 2(Impa2)                        | 1.589934 |
| BC011108 | solute carrier family 41, member 3(Slc41a3)                            | 1.993922 |
| BC011135 | kelch domain containing 8A(Klhdc8a)                                    | 1.806027 |
| BC011147 | small nuclear RNA activating complex, polypeptide 2(Snpsc2)            | 1.858112 |
| BC011248 | ribosomal RNA processing 36 homolog (S. cerevisiae)(Rrp36)             | 1.649377 |
| BC011338 | baculoviral IAP repeat-containing 3(Birc3)                             | 1.784731 |
| BC012229 | capping protein regulator and myosin 1 linker 1(Carmil1)               | 1.594939 |
| BC012311 | No data                                                                | 2.214027 |
| BC012312 | kelch domain containing 4(Klhdc4)                                      | 1.972101 |
| BC012520 | pantothenate kinase 4(Pank4)                                           | 1.866528 |

|          |                                                                                        |          |
|----------|----------------------------------------------------------------------------------------|----------|
| BC012871 | phosphatase and actin regulator 2(Phactr2)                                             | 1.610097 |
| BC013096 | mediator complex subunit 6(Med6)                                                       | 1.635592 |
| BC013481 | RNA binding motif protein 47(Rbm47)                                                    | 1.507113 |
| BC013508 | mitotic spindle positioning(Misp)                                                      | 1.672109 |
| BC013813 | integrator complex subunit 4(Ints4)                                                    | 1.670395 |
| BC014734 | EPS8-like 3(Eps8l3)                                                                    | 1.55749  |
| BC014763 | far upstream element (FUSE) binding protein 1(Fubp1)                                   | 1.762122 |
| BC014765 | integrin alpha 1(Itga1)                                                                | 1.537478 |
| BC014817 | proline-rich coiled-coil 1(Prrc1)                                                      | 1.523335 |
| BC014819 | fibroblast growth factor receptor substrate 3(Frs3)                                    | 1.784487 |
| BC043938 | small nuclear ribonucleoprotein 70 (U1)(Snrnp70)                                       | 1.538498 |
| BF140573 | No data                                                                                | 1.998815 |
| BF169118 | No data                                                                                | 1.695711 |
| BF233577 | No data                                                                                | 1.514537 |
| BQ956705 | No data                                                                                | 1.881053 |
| D00622   | low density lipoprotein receptor-related protein associated protein 1(Lrpap1)          | 1.603038 |
| D12729   | No data                                                                                | 1.795692 |
| D13905   | protein tyrosine phosphatase, receptor type, D(Ptprd)                                  | 2.160925 |
| D16599   | No data                                                                                | 1.921769 |
| D29770   | No data                                                                                | 1.537724 |
| D29922   | No data                                                                                | 1.86107  |
| D29937   | No data                                                                                | 2.579475 |
| D37791   | WD repeat and FYVE domain containing 3(Wdfy3)                                          | 2.082103 |
| D44443   | cDNA sequence BC005685(BC005685)                                                       | 1.915222 |
| D86423   | keratin associated protein 8-1(Krtap8-1)                                               | 1.658642 |
| J02935   | protein kinase, cAMP dependent regulatory, type II alpha(Prkar2a)                      | 1.721185 |
| J04576   | No data                                                                                | 1.518927 |
| K02782   | complement component 3(C3)                                                             | 1.61805  |
| L00653   | tryptase alpha/beta 1(Tpsab1)                                                          | 2.673875 |
| L08993   | No data                                                                                | 1.588128 |
| L09001   | No data                                                                                | 1.609782 |
| L10896   | paternally expressed 3(Peg3)                                                           | 1.68196  |
| L10906   | DAZ associated protein 2(Dazap2)                                                       | 2.81924  |
| L14361   | No data                                                                                | 2.023391 |
| L17076   | hnRNP-associated with lethal yellow(Raly)                                              | 3.102477 |
| L17334   | gamma-glutamyltransferase 1(Ggt1)                                                      | 2.444315 |
| L19564   | solute carrier family 6 (neurotransmitter transporter, noradrenalin), member 2(Slc6a2) | 1.505378 |
| L20331   | adenosine A3 receptor(Adora3)                                                          | 2.095162 |

|           |                                                                                                                     |          |
|-----------|---------------------------------------------------------------------------------------------------------------------|----------|
| L20336    | dopamine receptor D1(Drd1)                                                                                          | 1.529291 |
| L21018    | immunoglobulin heavy chain (V7183 family)(Igh-V7183)                                                                | 1.56511  |
| L21707    | receptor-like tyrosine kinase(Ryk)                                                                                  | 2.321648 |
| L22571    | No data                                                                                                             | 1.82272  |
| L23316    | G-protein signalling modulator 1 (AGS3-like, C. elegans)(Gpsm1)                                                     | 1.628258 |
| L25761    | Eph receptor B4(Ephb4)                                                                                              | 2.628439 |
| L36179    | sodium channel, voltage-gated, type VII, alpha(Scn7a)                                                               | 2.763304 |
| L37413    | No data                                                                                                             | 1.563352 |
| M11897    | predicted gene 4736(Gm4736)                                                                                         | 3.072636 |
| M12236    | No data                                                                                                             | 1.601787 |
| M12309    | No data                                                                                                             | 1.684709 |
| M12449    | No data                                                                                                             | 2.072243 |
| M15525    | laminin B1(Lamb1)                                                                                                   | 1.948451 |
| M18500    | Ig heavy chain Mem5-like(LOC641025)                                                                                 | 2.056975 |
| M23109    | coagulation factor IX(F9)                                                                                           | 1.853308 |
| M25487    | histone cluster 1, H2bp(Hist1h2bp)                                                                                  | 2.431603 |
| M25575    | No data                                                                                                             | 1.877651 |
| M26156    | No data                                                                                                             | 1.818939 |
| M26986    | No data                                                                                                             | 2.017906 |
| M27020    | No data                                                                                                             | 1.625259 |
| M29018    | No data                                                                                                             | 1.62333  |
| M30425    | No data                                                                                                             | 1.529859 |
| M31997    | No data                                                                                                             | 1.575767 |
| M32044    | No data                                                                                                             | 1.684631 |
| M32050    | No data                                                                                                             | 1.715858 |
| M35732    | seminal vesicle secretory protein 4(Svs4)                                                                           | 2.239076 |
| M37594    | No data                                                                                                             | 1.913392 |
| M38228    | No data                                                                                                             | 2.269921 |
| M55512    | Wilms tumor 1 homolog(Wt1)                                                                                          | 1.98723  |
| M57975    | calcium channel, voltage-dependent, L type, alpha 1D subunit(Cacna1d)                                               | 1.923917 |
| M58500    | No data                                                                                                             | 1.572098 |
| M79304    | RAB22A, member RAS oncogene family(Rab22a)                                                                          | 1.977736 |
| M81747    | No data                                                                                                             | 1.752315 |
| M83741    | pterin 4 alpha carbinolamine dehydratase/dimerization cofactor of hepatocyte nuclear factor 1 alpha (TCF1) 1(Pcbd1) | 1.623216 |
| M87848    | No data                                                                                                             | 1.749029 |
| M90088    | No data                                                                                                             | 1.689026 |
| M94292    | No data                                                                                                             | 1.511319 |
| NM_007398 | adenosine deaminase(Ada)                                                                                            | 1.518547 |
| NM_007430 | nuclear receptor subfamily 0, group B, member 1(Nr0b1)                                                              | 1.826357 |



|           |                                                                        |          |
|-----------|------------------------------------------------------------------------|----------|
| NM_007431 | alkaline phosphatase, liver/bone/kidney(Alpl)                          | 1.839053 |
| NM_007443 | alpha 1 microglobulin/bikunin(Ambp)                                    | 1.832626 |
| NM_007508 | ATPase, H+ transporting, lysosomal V1 subunit A(Atp6v1a)               | 1.889122 |
| NM_007512 | ATPase inhibitory factor 1(Atpif1)                                     | 1.871922 |
| NM_007533 | branched chain ketoacid dehydrogenase E1, alpha polypeptide(Bckdha)    | 1.702475 |
| NM_007596 | calcium modulating ligand(Caml)                                        | 1.636894 |
| NM_007597 | calnexin(Canx)                                                         | 1.539048 |
| NM_007601 | calpain 3(Capn3)                                                       | 1.626949 |
| NM_007603 | calpain 6(Capn6)                                                       | 1.773347 |
| NM_007611 | caspase 7(Casp7)                                                       | 2.004619 |
| NM_007614 | catenin (cadherin associated protein), beta 1(Ctnnb1)                  | 2.397372 |
| NM_007628 | cyclin A1(Ccna1)                                                       | 3.186238 |
| NM_007637 | chaperonin containing Tcp1, subunit 5 (epsilon)(Cct5)                  | 1.855276 |
| NM_007646 | CD38 antigen(Cd38)                                                     | 1.57315  |
| NM_007652 | CD59a antigen(Cd59a)                                                   | 1.995299 |
| NM_007656 | CD82 antigen(Cd82)                                                     | 2.101329 |
| NM_007683 | centromere protein C1(Cenpc1)                                          | 2.200081 |
| NM_007688 | cofilin 2, muscle(Cfl2)                                                | 1.82894  |
| NM_007714 | CDC like kinase 4(Clk4)                                                | 2.182973 |
| NM_007752 | ceruloplasmin(Cp)                                                      | 1.671673 |
| NM_007800 | cathepsin G(Ctsg)                                                      | 2.20658  |
| NM_007828 | death-associated protein kinase 3(Dapk3)                               | 1.697535 |
| NM_007832 | deoxycytidine kinase(Dck)                                              | 1.531034 |
| NM_007863 | membrane protein, palmitoylated 3 (MAGUK p55 subfamily member 3)(Mpp3) | 2.15014  |
| NM_007877 | dopamine receptor D3(Drd3)                                             | 1.922372 |
| NM_007878 | dopamine receptor D4(Drd4)                                             | 2.123212 |
| NM_007931 | endonuclease G(Endog)                                                  | 2.315783 |
| NM_007932 | endoglin(Eng)                                                          | 1.684085 |
| NM_007955 | protein tyrosine phosphatase, receptor type, V(Ptprv)                  | 2.166039 |
| NM_007974 | coagulation factor II (thrombin) receptor-like 1(F2rl1)                | 1.88367  |
| NM_008006 | fibroblast growth factor 2(Fgf2)                                       | 1.899985 |
| NM_008010 | fibroblast growth factor receptor 3(Fgfr3)                             | 2.416398 |
| NM_008046 | follistatin(Fst)                                                       | 1.502631 |
| NM_008049 | ferritin light polypeptide 2, pseudogene(Ftl2-ps)                      | 2.649893 |
| NM_008060 | alpha glucosidase 2 alpha neutral subunit(Ganab)                       | 2.122502 |
| NM_008077 | glutamate decarboxylase 1(Gad1)                                        | 1.612967 |
| NM_008104 | glial cells missing homolog 2 (Drosophila)(Gcm2)                       | 2.35633  |
| NM_008126 | gap junction protein, beta 3(Gjb3)                                     | 1.999003 |
| NM_008158 | G protein-coupled receptor 27(Gpr27)                                   | 1.930434 |

|           |                                                                       |          |
|-----------|-----------------------------------------------------------------------|----------|
| NM_008184 | glutathione S-transferase, mu 6(Gstm6)                                | 1.704034 |
| NM_008193 | guanylate kinase 1(Guk1)                                              | 1.595565 |
| NM_008209 | major histocompatibility complex, class I-related(Mr1)                | 1.692138 |
| NM_008273 | homeobox D11(Hoxd11)                                                  | 1.813049 |
| NM_008278 | hydroxyprostaglandin dehydrogenase 15 (NAD)(Hpgd)                     | 1.625139 |
| NM_008285 | histamine receptor H1(Hrh1)                                           | 1.740528 |
| NM_008286 | histamine receptor H2(Hrh2)                                           | 1.848636 |
| NM_008322 | No data                                                               | 1.908616 |
| NM_008365 | interleukin 18 receptor 1(Il18r1)                                     | 1.687429 |
| NM_008367 | interleukin 2 receptor, alpha chain(Il2ra)                            | 1.565626 |
| NM_008446 | kinesin family member 4(Kif4)                                         | 2.010629 |
| NM_008450 | kinesin light chain 1(Klc1)                                           | 1.797142 |
| NM_008485 | laminin, gamma 2(Lamc2)                                               | 2.067252 |
| NM_008486 | alanyl (membrane) aminopeptidase(Anpep)                               | 2.198637 |
| NM_008509 | lipoprotein lipase(Lpl)                                               | 1.626608 |
| NM_008512 | low density lipoprotein receptor-related protein 1(Lrp1)              | 1.57919  |
| NM_008518 | lymphotoxin B(Ltb)                                                    | 1.82549  |
| NM_008575 | transformed mouse 3T3 cell double minute 4(Mdm4)                      | 1.604179 |
| NM_008576 | ATP-binding cassette, sub-family C (CFTR/MRP), member 1(Abcc1)        | 2.034145 |
| NM_008581 | melanoma antigen(Mela)                                                | 1.746404 |
| NM_008606 | matrix metalloproteinase 11(Mmp11)                                    | 1.720102 |
| NM_008650 | methylmalonyl-Coenzyme A mutase(Mut)                                  | 1.655082 |
| NM_008662 | myosin VI(Myo6)                                                       | 2.089166 |
| NM_008700 | NK2 homeobox 5(Nkx2-5)                                                | 1.843501 |
| NM_008713 | nitric oxide synthase 3, endothelial cell(Nos3)                       | 1.770976 |
| NM_008716 | notch 3(Notch3)                                                       | 1.647156 |
| NM_008719 | neuronal PAS domain protein 2(Npas2)                                  | 2.267489 |
| NM_008728 | natriuretic peptide receptor 3(Npr3)                                  | 1.566378 |
| NM_008734 | neuregulin 3(Nrg3)                                                    | 1.860072 |
| NM_008747 | neurotensin receptor 2(Ntsr2)                                         | 1.771543 |
| NM_008803 | phosphodiesterase 8A(Pde8a)                                           | 1.678793 |
| NM_008845 | phosphatidylinositol-5-phosphate 4-kinase, type II, alpha(Pip4k2a)    | 1.900855 |
| NM_008851 | phosphatidylinositol transfer protein, membrane-associated 1(Pitpnm1) | 2.437089 |
| NM_008852 | paired-like homeodomain transcription factor 3(Pitx3)                 | 1.565917 |
| NM_008888 | paired-like homeobox 2b(Phox2b)                                       | 1.613061 |
| NM_008910 | protein phosphatase 1A, magnesium dependent, alpha isoform(Ppm1a)     | 1.536606 |
| NM_008930 | prolactin family 7, subfamily a, member 1(Pr17a1)                     | 1.538832 |

|           |                                                                                                                                                     |          |
|-----------|-----------------------------------------------------------------------------------------------------------------------------------------------------|----------|
| NM_008933 | protamine 2(Prm2)                                                                                                                                   | 1.689632 |
| NM_008960 | phosphatase and tensin homolog(Pten)                                                                                                                | 1.533047 |
| NM_008971 | twinfilin actin binding protein 1(Twf1)                                                                                                             | 2.380632 |
| NM_008979 | protein tyrosine phosphatase, non-receptor type 22 (lymphoid)(Ptpn22)                                                                               | 1.52712  |
| NM_009004 | kinesin family member 20A(Kif20a)                                                                                                                   | 2.127217 |
| NM_009006 | mitogen-activated protein kinase kinase kinase kinase 2(Map4k2)                                                                                     | 2.363725 |
| NM_009027 | RAS protein-specific guanine nucleotide-releasing factor 2(Rasgrf2)                                                                                 | 1.526257 |
| NM_009036 | recombination signal binding protein for immunoglobulin kappa J region-like(Rbpjl)                                                                  | 1.685266 |
| NM_009080 | ribosomal protein L26(Rpl26)                                                                                                                        | 2.366016 |
| NM_009096 | ribosomal protein S6(Rps6)                                                                                                                          | 1.890904 |
| NM_009097 | ribosomal protein S6 kinase polypeptide 1(Rps6ka1)                                                                                                  | 1.889942 |
| NM_009099 | tripartite motif-containing 30A(Trim30a)                                                                                                            | 1.803083 |
| NM_009150 | selenium binding protein 1(Selenbp1)                                                                                                                | 1.793836 |
| NM_009154 | sema domain, seven thrombospondin repeats (type 1 and type 1-like), transmembrane domain (TM) and short cytoplasmic domain, (semaphorin) 5A(Sema5a) | 1.630657 |
| NM_009159 | serine/arginine-rich splicing factor 5(Srsf5)                                                                                                       | 2.460056 |
| NM_009191 | ClpB caseinolytic peptidase B(Clpb)                                                                                                                 | 1.881915 |
| NM_009204 | solute carrier family 2 (facilitated glucose transporter), member 4(Slc2a4)                                                                         | 3.343217 |
| NM_009208 | solute carrier family 4 (anion exchanger), member 3(Slc4a3)                                                                                         | 1.629402 |
| NM_009223 | stannin(Snn)                                                                                                                                        | 1.691962 |
| NM_009237 | SRY (sex determining region Y)-box 3(Sox3)                                                                                                          | 2.286288 |
| NM_009241 | sperm adhesion molecule 1(Spam1)                                                                                                                    | 1.716028 |
| NM_009269 | serine palmitoyltransferase, long chain base subunit 1(Sptlc1)                                                                                      | 2.347834 |
| NM_009285 | stanniocalcin 1(Stc1)                                                                                                                               | 1.946907 |
| NM_009298 | surfeit gene 6(Surf6)                                                                                                                               | 2.056893 |
| NM_009301 | seminal vesicle secretory protein 5(Svs5)                                                                                                           | 1.718575 |
| NM_009314 | tachykinin receptor 2(Tacr2)                                                                                                                        | 2.311769 |
| NM_009321 | tubulin cofactor A(Tbca)                                                                                                                            | 1.71243  |
| NM_009329 | zinc finger protein 354A(Zfp354a)                                                                                                                   | 2.107155 |
| NM_009330 | HNF1 homeobox B(Hnf1b)                                                                                                                              | 2.198898 |
| NM_009334 | transcription factor AP-2 beta(Tfap2b)                                                                                                              | 2.076316 |
| NM_009343 | PHD finger protein 1(Phf1)                                                                                                                          | 1.609246 |
| NM_009398 | tumor necrosis factor alpha induced protein 6(Tnfaip6)                                                                                              | 1.92552  |
| NM_009399 | tumor necrosis factor receptor superfamily, member 11a, NFKB activator(Tnfrsf11a)                                                                   | 1.575393 |
| NM_009445 | Ttk protein kinase(Ttk)                                                                                                                             | 2.739018 |

|           |                                                                                                    |          |
|-----------|----------------------------------------------------------------------------------------------------|----------|
| NM_009464 | uncoupling protein 3 (mitochondrial, proton carrier)(Ucp3)                                         | 1.879687 |
| NM_009507 | von Hippel-Lindau tumor suppressor(Vhl)                                                            | 1.747769 |
| NM_009517 | zinc finger matrin type 3(Zmat3)                                                                   | 2.176854 |
| NM_009536 | tyrosine 3-monooxygenase/tryptophan 5-monooxygenase activation protein, epsilon polypeptide(Ywhae) | 2.002982 |
| NM_009549 | zinc finger protein 185(Zfp185)                                                                    | 1.507356 |
| NM_009568 | zinc finger protein 94(Zfp94)                                                                      | 2.379712 |
| NM_009575 | zinc finger protein of the cerebellum 3(Zic3)                                                      | 1.672576 |
| NM_009580 | zona pellucida glycoprotein 1(Zp1)                                                                 | 1.950732 |
| NM_009601 | cholinergic receptor, nicotinic, beta polypeptide 1 (muscle)(Chrn1)                                | 1.54564  |
| NM_009604 | cholinergic receptor, nicotinic, gamma polypeptide(Chrng)                                          | 1.659516 |
| NM_009623 | adenylate cyclase 8(Adcy8)                                                                         | 1.53337  |
| NM_009634 | adenylosuccinate lyase(Adsl)                                                                       | 1.826552 |
| NM_009648 | A kinase (PRKA) anchor protein 1(Akap1)                                                            | 1.826734 |
| NM_009681 | adaptor-related protein complex 3, sigma 1 subunit(Ap3s1)                                          | 1.969213 |
| NM_009717 | neurogenic differentiation 6(Neurod6)                                                              | 1.705327 |
| NM_009748 | Bet1 golgi vesicular membrane trafficking protein(Bet1)                                            | 1.816134 |
| NM_009749 | brain expressed X-linked 2(Bex2)                                                                   | 2.305713 |
| NM_009808 | caspase 12(Casp12)                                                                                 | 1.533154 |
| NM_009814 | calsequestrin 2(Casq2)                                                                             | 1.870323 |
| NM_009881 | chromodomain protein, Y chromosome-like(Cdyl)                                                      | 1.647726 |
| NM_009933 | collagen, type VI, alpha 1(Col6a1)                                                                 | 1.941449 |
| NM_009947 | copine VI(Cpne6)                                                                                   | 1.559653 |
| NM_009964 | crystallin, alpha B(Cryab)                                                                         | 2.264399 |
| NM_009967 | crystallin, gamma S(Crygs)                                                                         | 2.716679 |
| NM_009971 | colony stimulating factor 3 (granulocyte)(Csf3)                                                    | 1.765691 |
| NM_009990 | CAP-GLY domain containing linker protein 2(Clip2)                                                  | 1.757295 |
| NM_010066 | DNA methyltransferase (cytosine-5) 1(Dnmt1)                                                        | 1.659025 |
| NM_010074 | dipeptidylpeptidase 4(Dpp4)                                                                        | 1.658419 |
| NM_010077 | dopamine receptor D2(Drd2)                                                                         | 1.583792 |
| NM_010109 | ephrin A5(Efna5)                                                                                   | 2.896646 |
| NM_010186 | Fc receptor, IgG, high affinity I(Fcgr1)                                                           | 1.781812 |
| NM_010188 | Fc receptor, IgG, low affinity III(Fcgr3)                                                          | 1.98628  |
| NM_010195 | leucine rich repeat containing G protein coupled receptor 5(Lgr5)                                  | 1.803167 |
| NM_010213 | four and a half LIM domains 3(Fhl3)                                                                | 1.966904 |
| NM_010254 | galanin receptor 2(Galr2)                                                                          | 1.984149 |
| NM_010289 | gap junction protein, alpha 10(Gja10)                                                              | 1.580231 |
| NM_010294 | glycerol kinase 2(Gk2)                                                                             | 1.612015 |
| NM_010301 | guanine nucleotide binding protein, alpha 11(Gna11)                                                | 2.122651 |
| NM_010324 | glutamic-oxaloacetic transaminase 1, soluble(Got1)                                                 | 1.599395 |

|           |                                                                                             |          |
|-----------|---------------------------------------------------------------------------------------------|----------|
| NM_010338 | G protein-coupled receptor 37(Gpr37)                                                        | 1.776877 |
| NM_010346 | growth factor receptor bound protein 7(Grb7)                                                | 2.023178 |
| NM_010347 | amino-terminal enhancer of split(Aes)                                                       | 2.478658 |
| NM_010351 | goosecoid homeobox(Gsc)                                                                     | 1.555732 |
| NM_010354 | No data                                                                                     | 1.953727 |
| NM_010407 | hemopoietic cell kinase(Hck)                                                                | 2.407049 |
| NM_010508 | interferon (alpha and beta) receptor 1(Ifnar1)                                              | 1.751429 |
| NM_010564 | inhibin alpha(Inha)                                                                         | 2.144804 |
| NM_010572 | insulin receptor substrate 4(Irs4)                                                          | 1.972649 |
| NM_010576 | integrin alpha 4(Itga4)                                                                     | 2.598818 |
| NM_010577 | integrin alpha 5 (fibronectin receptor alpha)(Itga5)                                        | 2.136915 |
| NM_010583 | IL2 inducible T cell kinase(Itk)                                                            | 2.70568  |
| NM_010589 | Janus kinase 3(Jak3)                                                                        | 1.690464 |
| NM_010655 | karyopherin (importin) alpha 2(Kpna2)                                                       | 1.656507 |
| NM_010666 | keratin 27(Krt27)                                                                           | 1.58714  |
| NM_010748 | lysosomal trafficking regulator(Lyst)                                                       | 1.691255 |
| NM_010754 | SMAD family member 2(Smad2)                                                                 | 1.569598 |
| NM_010756 | v-maf musculoaponeurotic fibrosarcoma oncogene family, protein G (avian)(Mafg)              | 1.869772 |
| NM_010768 | megakaryocyte-associated tyrosine kinase(Matk)                                              | 2.382129 |
| NM_010769 | matrilin 1, cartilage matrix protein(Matn1)                                                 | 1.531445 |
| NM_010780 | chymase 1, mast cell(Cma1)                                                                  | 1.519191 |
| NM_010800 | basic helix-loop-helix family, member a15(Bhlha15)                                          | 1.770116 |
| NM_010835 | msh homeobox 1(Msx1)                                                                        | 1.599024 |
| NM_010850 | myc-like oncogene, s-myc protein(Mycs)                                                      | 1.684611 |
| NM_010867 | myomesin 1(Myom1)                                                                           | 1.889074 |
| NM_010874 | N-acetyltransferase 2 (arylamine N-acetyltransferase)(Nat2)                                 | 2.99281  |
| NM_010903 | nuclear factor, erythroid derived 2, like 3(Nfe2l3)                                         | 1.564343 |
| NM_010907 | nuclear factor of kappa light polypeptide gene enhancer in B cells inhibitor, alpha(Nfkb1a) | 2.327233 |
| NM_010927 | nitric oxide synthase 2, inducible(Nos2)                                                    | 2.530784 |
| NM_010951 | G protein-coupled receptor 143(Gpr143)                                                      | 1.563768 |
| NM_011018 | sequestosome 1(Sqstm1)                                                                      | 2.164152 |
| NM_011037 | paired box 2(Pax2)                                                                          | 1.520505 |
| NM_011060 | peptidyl arginine deiminase, type III(Padi3)                                                | 1.577871 |
| NM_011067 | period circadian clock 3(Per3)                                                              | 1.6841   |
| NM_011076 | ATP-binding cassette, sub-family B (MDR/TAP), member 1A(Abc1a)                              | 2.282875 |
| NM_011083 | phosphatidylinositol 3-kinase, C2 domain containing, alpha polypeptide(Pik3c2a)             | 2.601385 |
| NM_011086 | phosphoinositide kinase, FYVE finger containing(Pikfyve)                                    | 1.955154 |

|           |                                                                                                                          |          |
|-----------|--------------------------------------------------------------------------------------------------------------------------|----------|
| NM_011105 | polycystin (PKD) family receptor for egg jelly(Pkdrej)                                                                   | 2.018073 |
| NM_011121 | polo-like kinase 1(Plk1)                                                                                                 | 1.772347 |
| NM_011124 | chemokine (C-C motif) ligand 21A (serine)(Ccl21a)                                                                        | 1.803833 |
| NM_011125 | phospholipid transfer protein(Pltp)                                                                                      | 1.707438 |
| NM_011153 | protein phosphatase 1, regulatory subunit 17(Ppp1r17)                                                                    | 1.53366  |
| NM_011180 | cytohesin 1(Cyth1)                                                                                                       | 2.800471 |
| NM_011181 | cytohesin 2(Cyth2)                                                                                                       | 1.791318 |
| NM_011216 | protein tyrosine phosphatase, receptor type, O(Ptpro)                                                                    | 2.563634 |
| NM_011221 | purine rich element binding protein B(Purb)                                                                              | 2.014595 |
| NM_011225 | No data                                                                                                                  | 2.587203 |
| NM_011294 | SUB1 homolog (S. cerevisiae)(Sub1)                                                                                       | 2.522906 |
| NM_011329 | chemokine (C-C motif) ligand 1(Ccl1)                                                                                     | 2.954516 |
| NM_011331 | chemokine (C-C motif) ligand 12(Ccl12)                                                                                   | 1.903954 |
| NM_011332 | chemokine (C-C motif) ligand 17(Ccl17)                                                                                   | 2.325014 |
| NM_011338 | chemokine (C-C motif) ligand 9(Ccl9)                                                                                     | 2.348849 |
| NM_011370 | cytoplasmic FMR1 interacting protein 1(Cyfi1)                                                                            | 1.921313 |
| NM_011371 | ST6 (alpha-N-acetyl-neuraminy-2,3-beta-galactosyl-1,3)-N-acetylgalactosaminide alpha-2,6-sialyltransferase 1(St6galnac1) | 1.643364 |
| NM_011405 | solute carrier family 7 (cationic amino acid transporter, y+ system), member 7(Slc7a7)                                   | 1.566552 |
| NM_011407 | schlafen 1(Slfn1)                                                                                                        | 1.517133 |
| NM_011414 | secretory leukocyte peptidase inhibitor(Slpi)                                                                            | 1.917554 |
| NM_011429 | No data                                                                                                                  | 1.860243 |
| NM_011482 | NHP2 non-histone chromosome protein 2-like 1 (S. cerevisiae)(Nhp2l1)                                                     | 1.524408 |
| NM_011520 | syndecan 3(Sdc3)                                                                                                         | 1.980156 |
| NM_011541 | transcription elongation factor A (SII) 1(Tcea1)                                                                         | 1.78577  |
| NM_011563 | peroxiredoxin 2(Prdx2)                                                                                                   | 1.856243 |
| NM_011571 | testis specific protein kinase 1(Tesk1)                                                                                  | 1.514472 |
| NM_011588 | tripartite motif-containing 28(Trim28)                                                                                   | 1.620089 |
| NM_011650 | translin(Tsn)                                                                                                            | 1.786082 |
| NM_011651 | testis-specific serine kinase substrate(Tsks)                                                                            | 2.035971 |
| NM_011665 | ubiquitin-conjugating enzyme E2l(Ube2l)                                                                                  | 1.551562 |
| NM_011699 | lin-7 homolog C (C. elegans)(Lin7c)                                                                                      | 1.630897 |
| NM_011703 | vasoactive intestinal peptide receptor 1(Vipr1)                                                                          | 2.442181 |
| NM_011710 | tryptophanyl-tRNA synthetase(Wars)                                                                                       | 1.560977 |
| NM_011770 | IKAROS family zinc finger 2(Ikzf2)                                                                                       | 2.233651 |
| NM_011777 | zyxin(Zyx)                                                                                                               | 2.356518 |
| NM_011824 | gremlin 1, DAN family BMP antagonist(Grem1)                                                                              | 1.845387 |
| NM_011830 | inosine 5'-phosphate dehydrogenase 2(Impdh2)                                                                             | 1.691297 |
| NM_011846 | matrix metalloproteinase 17(Mmp17)                                                                                       | 1.905048 |

|           |                                                                                          |          |
|-----------|------------------------------------------------------------------------------------------|----------|
| NM_011868 | enoyl-Coenzyme A delta isomerase 2(Eci2)                                                 | 2.314469 |
| NM_011885 | mitochondrial ribosomal protein S12(Mrps12)                                              | 1.980481 |
| NM_011886 | secretory carrier membrane protein 3(Scamp3)                                             | 2.715745 |
| NM_011908 | ubiquitin-like 3(Ubl3)                                                                   | 1.529318 |
| NM_011944 | mitogen-activated protein kinase kinase 7(Map2k7)                                        | 1.740229 |
| NM_011981 | zinc finger protein 260(Zfp260)                                                          | 1.717844 |
| NM_011982 | homer scaffolding protein 1(Homer1)                                                      | 1.527244 |
| NM_011994 | ATP-binding cassette, sub-family D (ALD), member 2(Abcd2)                                | 1.623215 |
| NM_012011 | eukaryotic translation initiation factor 2, subunit 3, structural gene Y-linked(Eif2s3y) | 2.341973 |
| NM_012013 | folliculogenesis specific basic helix-loop-helix(Figla)                                  | 2.130596 |
| NM_013477 | ATPase, H+ transporting, lysosomal V0 subunit D1(Atp6v0d1)                               | 1.571494 |
| NM_013496 | cellular retinoic acid binding protein I(Crabp1)                                         | 2.022819 |
| NM_013498 | cAMP responsive element modulator(Crem)                                                  | 1.799366 |
| NM_013580 | lactate dehydrogenase C(Ldhc)                                                            | 2.583086 |
| NM_013592 | matrilin 4(Matn4)                                                                        | 1.771842 |
| NM_013599 | matrix metalloproteinase 9(Mmp9)                                                         | 1.702349 |
| NM_013604 | metaxin 1(Mtx1)                                                                          | 2.445543 |
| NM_013608 | nascent polypeptide-associated complex alpha polypeptide(Naca)                           | 1.921863 |
| NM_013609 | nerve growth factor(Ngf)                                                                 | 1.902833 |
| NM_013622 | opioid receptor, delta 1(Oprd1)                                                          | 1.997867 |
| NM_013641 | prostaglandin E receptor 1 (subtype EP1)(Ptger1)                                         | 1.631009 |
| NM_013643 | protein tyrosine phosphatase, non-receptor type 5(Ptpn5)                                 | 1.995964 |
| NM_013648 | reticulon 2 (Z-band associated protein)(Rtn2)                                            | 2.752558 |
| NM_013655 | chemokine (C-X-C motif) ligand 12(Cxcl12)                                                | 1.504744 |
| NM_013662 | sema domain, transmembrane domain (TM), and cytoplasmic domain, (semaphorin) 6B(Sema6b)  | 1.510199 |
| NM_013677 | surfeit gene 1(Surf1)                                                                    | 1.954108 |
| NM_013678 | surfeit gene 2(Surf2)                                                                    | 1.967934 |
| NM_013709 | Sh3 domain YSC-like 1(Sh3yl1)                                                            | 1.673925 |
| NM_013730 | signaling lymphocytic activation molecule family member 1(Slamf1)                        | 2.312992 |
| NM_013732 | CART prepropeptide(Cartpt)                                                               | 1.784302 |
| NM_013737 | phospholipase A2, group VII (platelet-activating factor acetylhydrolase, plasma)(Pla2g7) | 1.808935 |
| NM_013753 | phosphatase domain containing, paladin 1(Pald1)                                          | 1.823715 |
| NM_013792 | alpha-N-acetylglucosaminidase (Sanfilippo disease IIIB)(Naglu)                           | 1.83069  |
| NM_013794 | killer cell lectin-like receptor, subfamily A, member 16(Klra16)                         | 1.571467 |
| NM_013800 | BarH-like homeobox 2(Barx2)                                                              | 1.939162 |
| NM_013846 | receptor tyrosine kinase-like orphan receptor 2(Ror2)                                    | 2.065548 |

|           |                                                                                                    |                         |
|-----------|----------------------------------------------------------------------------------------------------|-------------------------|
| NM_013859 | zinc finger, HIT domain containing 2(Znhit2)                                                       | 1.632443                |
| NM_013878 | calcium binding protein 2(Cabp2)                                                                   | 1.958316                |
| NM_013895 | translocase of inner mitochondrial membrane 13(Timm13)                                             | 1.794353                |
| NM_013917 | pituitary tumor-transforming gene 1(Pttg1)                                                         | 2.206679                |
| NM_013926 | chromobox 8(Cbx8)                                                                                  | 2.318215                |
| NM_015756 | shroom family member 3(Shroom3)                                                                    | 1.619985                |
| NM_015776 | microfibrillar associated protein 5(Mfap5)                                                         | 1.90966                 |
| NM_015783 | ISG15 ubiquitin-like modifier(Isg15)                                                               | 1.648214                |
| NM_015789 | dickkopf-like 1(Dkk1)                                                                              | 2.075882                |
| NM_015802 | deleted in liver cancer 1(Dlc1)                                                                    | 1.528974                |
| NM_015804 | ATPase, class VI, type 11A(Atp11a)                                                                 | 2.111411                |
| NM_015805 | ATPase, class II, type 9B(Atp9b)                                                                   | 1.886272                |
| NM_016676 | RAB10, member RAS oncogene family(Rab10)                                                           | 1.771343                |
| NM_016679 | kelch-like ECH-associated protein 1(Keap1)                                                         | 2.257385                |
| NM_016693 | mitogen-activated protein kinase kinase kinase 6(Map3k6)                                           | 1.62427                 |
| NM_016721 | IQ motif containing GTPase activating protein 1(Iqgap1)                                            | 1.645325                |
| NM_016736 | negative regulator of ubiquitin-like proteins 1(Nub1)                                              | 1.588856                |
| NM_016745 | ATPase, Ca++ transporting, ubiquitous(Atp2a3)                                                      | 2.099953                |
| NM_016759 | RUN domain containing 3A(Rundc3a)                                                                  | 1.944744                |
| NM_016789 | neuronal pentraxin 2(Nptx2)                                                                        | 1.8428                  |
| NM_016792 | thioredoxin-like 1(Txnl1)                                                                          | 2.758671                |
| NM_016859 | bystin-like(Bysl)                                                                                  | 2.02109                 |
| NM_016881 | phosphomannomutase 2(Pmm2)                                                                         | 1.832986                |
| NM_016888 | UDP-GlcNAc:betaGal<br>acetylglucosaminyltransferase 2(B3gnt2)                                      | beta-1,3-N-<br>2.714659 |
| NM_016896 | mitogen-activated protein kinase kinase kinase 14(Map3k14)                                         | 1.858091                |
| NM_016905 | galactokinase 1(Galk1)                                                                             | 1.620859                |
| NM_016910 | protein phosphatase 1D magnesium-dependent, delta<br>isoform(Ppm1d)                                | 2.913392                |
| NM_016961 | mitogen-activated protein kinase 9(Mapk9)                                                          | 1.899108                |
| NM_016969 | myeloid-associated differentiation marker(Myadm)                                                   | 1.605003                |
| NM_017379 | tubulin, alpha 8(Tuba8)                                                                            | 2.588056                |
| NM_017404 | mitochondrial ribosomal protein L39(Mrpl39)                                                        | 1.758051                |
| NM_017477 | coatamer protein complex, subunit gamma 1(Copg1)                                                   | 2.075827                |
| NM_018748 | golgi autoantigen, golgin subfamily a, 4(Golga4)                                                   | 1.977528                |
| NM_018753 | tyrosine 3-monooxygenase/tryptophan 5-monooxygenase<br>activation protein, beta polypeptide(Ywhab) | 1.504411                |
| NM_018760 | solute carrier family 4 (anion exchanger), member 4(Slc4a4)                                        | 2.228285                |
| NM_018762 | glycoprotein 9 (platelet)(Gp9)                                                                     | 2.365477                |
| NM_018796 | eukaryotic translation elongation factor 1 beta 2(Eef1b2)                                          | 1.693712                |
| NM_018801 | synaptotagmin VII(Syt7)                                                                            | 1.699314                |



|           |                                                                            |          |
|-----------|----------------------------------------------------------------------------|----------|
| NM_018822 | N-sulfoglucosamine sulfohydrolase (sulfamidase)(Sgsh)                      | 1.907199 |
| NM_018852 | sodium channel, voltage-gated, type IX, alpha(Scn9a)                       | 1.693926 |
| NM_018863 | prodynorphin(Pdyn)                                                         | 1.866877 |
| NM_018869 | G protein-coupled receptor kinase 5(Grk5)                                  | 2.707373 |
| NM_019428 | ribonuclease P/MRP 30 subunit(Rpp30)                                       | 1.852545 |
| NM_019435 | NADH dehydrogenase (ubiquinone) 1 beta subcomplex, 11(Ndufb11)             | 1.781028 |
| NM_019447 | hepatocyte growth factor activator(Hgfac)                                  | 2.880428 |
| NM_019451 | interleukin 1 family, member 5 (delta)(Il1f5)                              | 2.20633  |
| NM_019466 | regulator of calcineurin 1(Rcan1)                                          | 1.528583 |
| NM_019486 | olfactory receptor 71(Olfr71)                                              | 1.804024 |
| NM_019492 | regulator of G-protein signaling 3(Rgs3)                                   | 1.876513 |
| NM_019569 | fascin actin-bundling protein 3(Fscn3)                                     | 1.583701 |
| NM_019634 | tetraspanin 7(Tspan7)                                                      | 2.051586 |
| NM_019671 | neuroepithelial cell transforming gene 1(Net1)                             | 1.927022 |
| NM_019681 | neuronal calcium sensor 1(Ncs1)                                            | 1.751135 |
| NM_019693 | DEAD (Asp-Glu-Ala-Asp) box polypeptide 39B(Ddx39b)                         | 1.538243 |
| NM_019695 | par-6 family cell polarity regulator alpha(Pard6a)                         | 2.051919 |
| NM_019717 | atlastin GTPase 2(Atl2)                                                    | 1.737386 |
| NM_019718 | ADP-ribosylation factor-like 3(Arl3)                                       | 1.542589 |
| NM_019729 | ubiquitin specific peptidase 8(Usp8)                                       | 1.682801 |
| NM_019745 | programmed cell death 10(Pdcd10)                                           | 1.657079 |
| NM_019777 | inhibitor of kappaB kinase epsilon(Ikbke)                                  | 1.905188 |
| NM_019787 | SEC23 homolog B, COPII coat complex component(Sec23b)                      | 2.977623 |
| NM_019795 | DnaJ heat shock protein family (Hsp40) member C7(Dnajc7)                   | 1.681775 |
| NM_019806 | vesicle-associated membrane protein, associated protein B and C(Vapb)      | 1.913857 |
| NM_019817 | coatamer protein complex, subunit zeta 1(Copz1)                            | 1.750865 |
| NM_019826 | isovaleryl coenzyme A dehydrogenase(Ivd)                                   | 2.190806 |
| NM_019833 | family with sequence similarity 69, member B(Fam69b)                       | 1.600434 |
| NM_019871 | solute carrier family 35, member G3(Slc35g3)                               | 1.680709 |
| NM_019875 | ATP-binding cassette, sub-family B (MDR/TAP), member 9(Abc9)               | 1.580621 |
| NM_019930 | RAN binding protein 9(Ranbp9)                                              | 1.632943 |
| NM_019935 | ovo like zinc finger 1(Ovo1)                                               | 2.004183 |
| NM_019951 | SEC11 homolog A, signal peptidase complex subunit(Sec11a)                  | 2.848565 |
| NM_019960 | heat shock protein 3(Hspb3)                                                | 1.827713 |
| NM_019971 | platelet-derived growth factor, C polypeptide(Pdgfc)                       | 1.803179 |
| NM_019972 | sortilin 1(Sort1)                                                          | 1.640807 |
| NM_020014 | glial cell line derived neurotrophic factor family receptor alpha 4(Gfra4) | 2.60809  |

|           |                                                                                        |          |
|-----------|----------------------------------------------------------------------------------------|----------|
| NM_020021 | Moloney sarcoma oncogene(Mos)                                                          | 2.06294  |
| NM_020028 | lysophosphatidic acid receptor 2(Lpar2)                                                | 1.553545 |
| NM_020045 | NFU1 iron-sulfur cluster scaffold(Nfu1)                                                | 1.971105 |
| NM_020050 | TMEM9 domain family, member B(Tmem9b)                                                  | 1.840873 |
| NM_020259 | Hedgehog-interacting protein(Hhip)                                                     | 2.436369 |
| NM_020272 | phosphoinositide-3-kinase, catalytic, gamma polypeptide(Pik3cg)                        | 1.962446 |
| NM_020276 | NMDA receptor synaptonuclear signaling and neuronal migration factor(Nsmf)             | 2.44132  |
| NM_020284 | cathepsin R(Ctsr)                                                                      | 1.936612 |
| NM_020491 | Sjogren's syndrome/scleroderma autoantigen 1 homolog (human)(Sssca1)                   | 2.16443  |
| NM_020505 | vav 3 oncogene(Vav3)                                                                   | 1.558946 |
| NM_020507 | transducer of ERBB2, 2(Tob2)                                                           | 1.857558 |
| NM_020619 | mannosyl-oligosaccharide glucosidase(Mogs)                                             | 2.133904 |
| NM_020623 | parathyroid hormone(Pth)                                                               | 1.656734 |
| NM_021301 | solute carrier family 15 (H+/peptide transporter), member 2(Slc15a2)                   | 1.534473 |
| NM_021327 | TNFAIP3 interacting protein 1(Tnip1)                                                   | 1.532308 |
| NM_021343 | spermatogenesis associated 5(Spata5)                                                   | 1.726989 |
| NM_021352 | crystallin, beta B3(Crybb3)                                                            | 3.114877 |
| NM_021374 | regulator of G-protein signaling 20(Rgs20)                                             | 1.655157 |
| NM_021378 | killer cell lectin-like receptor subfamily C, member 3(Klrc3)                          | 2.404138 |
| NM_021399 | B cell leukemia/lymphoma 11B(Bcl11b)                                                   | 1.823676 |
| NM_021426 | Na+/K+ transporting ATPase interacting 4(Nkain4)                                       | 1.533572 |
| NM_021427 | family with sequence similarity 181, member B(Fam181b)                                 | 2.085329 |
| NM_021458 | frizzled class receptor 3(Fzd3)                                                        | 1.518937 |
| NM_021487 | potassium voltage-gated channel, Isk-related family, member 1-like, pseudogene(Kcne1l) | 2.394566 |
| NM_021489 | coagulation factor XII (Hageman factor)(F12)                                           | 2.042195 |
| NM_021498 | polymerase (DNA directed), epsilon 3 (p17 subunit)(Pole3)                              | 1.667655 |
| NM_021526 | proteasome (prosome, macropain) 26S subunit, non-ATPase, 14(Psm14)                     | 2.272829 |
| NM_021534 | peroxisomal membrane protein 4(Pxmp4)                                                  | 1.872884 |
| NM_021546 | N-terminal EF-hand calcium binding protein 3(Necab3)                                   | 1.952925 |
| NM_021712 | solute carrier family 18 (vesicular monoamine), member 3(Slc18a3)                      | 1.960827 |
| NM_021793 | transmembrane protein 8 (five membrane-spanning domains)(Tmem8)                        | 1.604339 |
| NM_021882 | premelanosome protein(Pmel)                                                            | 2.197732 |
| NM_021892 | neuropeptide VF precursor(Npvf)                                                        | 1.703065 |
| NM_021898 | testis specific gene A8(Tsga8)                                                         | 1.900346 |

|           |                                                                 |          |
|-----------|-----------------------------------------------------------------|----------|
| NM_022879 | myosin, light polypeptide 7, regulatory(Myl7)                   | 2.174191 |
| NM_023115 | protocadherin 15(Pcdh15)                                        | 1.741519 |
| NM_023233 | tripartite motif-containing 13(Trim13)                          | 2.035913 |
| NM_023476 | tubulointerstitial nephritis antigen-like 1(Tinagl1)            | 1.859697 |
| NM_023530 | phospholipase A2, group XIIB(Pla2g12b)                          | 1.717813 |
| NM_023630 | general transcription factor IIA, 1-like(Gtf2a1l)               | 1.937802 |
| NM_023719 | thioredoxin interacting protein(Txnip)                          | 2.407121 |
| NM_023799 | meningioma expressed antigen 5 (hyaluronidase)(Mgea5)           | 1.959317 |
| NM_024190 | charged multivesicular body protein 1B(Chmp1b)                  | 1.644139 |
| NM_024192 | CUE domain containing 2(Cuedc2)                                 | 1.520155 |
| NM_024277 | ribosomal protein S27A(Rps27a)                                  | 1.776715 |
| NM_024281 | ribosome binding protein 1(Rrbp1)                               | 1.805374 |
| NM_024434 | leucine aminopeptidase 3(Lap3)                                  | 1.515938 |
| NM_024435 | neurotensin(Nts)                                                | 2.182021 |
| NM_024479 | Williams Beuren syndrome chromosome region 27 (human)(Wbscr27)  | 1.785166 |
| NM_025308 | proline/histidine/glycine-rich 1(Phgr1)                         | 1.658026 |
| NM_025318 | ER membrane protein complex subunit 6(Emc6)                     | 1.602677 |
| NM_025319 | RIKEN cDNA 0610009B22 gene(0610009B22Rik)                       | 2.379029 |
| NM_025331 | guanine nucleotide binding protein (G protein), gamma 11(Gng11) | 2.010572 |
| NM_025366 | coiled-coil-helix-coiled-coil-helix domain containing 1(Chchd1) | 2.451521 |
| NM_025376 | transmembrane protein 8C(Tmem8c)                                | 1.820922 |
| NM_025387 | transmembrane protein 14C(Tmem14c)                              | 2.029689 |
| NM_025458 | transmembrane p24 trafficking protein 6(Tmed6)                  | 1.693875 |
| NM_025498 | presenilin enhancer gamma secretase subunit(Psenen)             | 1.653861 |
| NM_025556 | coordinator of PRMT5, differentiation stimulator(Coprs)         | 1.511072 |
| NM_025558 | cytochrome b5 type B(Cyb5b)                                     | 2.241081 |
| NM_025562 | fission, mitochondrial 1(Fis1)                                  | 2.290223 |
| NM_025564 | mago homolog B, exon junction complex core component(Magohb)    | 1.611363 |
| NM_025573 | serine/arginine-rich splicing factor 9(Srsf9)                   | 1.598526 |
| NM_025628 | cytochrome c oxidase, subunit VIb polypeptide 1(Cox6b1)         | 1.568056 |
| NM_025670 | cell death inducing Trp53 target 1(Cdip1)                       | 1.774303 |
| NM_025741 | tumor protein D52-like 3(Trpd52l3)                              | 1.961843 |
| NM_025758 | ankyrin repeat and SOCS box-containing 17(Asb17)                | 1.844922 |
| NM_025770 | autophagy related 10(Atg10)                                     | 1.964172 |
| NM_025774 | Prkr interacting protein 1 (IL11 inducible)(Prkrip1)            | 1.887258 |
| NM_025814 | serpine1 mRNA binding protein 1(Serbp1)                         | 2.368018 |
| NM_026042 | mediator complex subunit 29(Med29)                              | 1.589402 |

|           |                                                                          |          |
|-----------|--------------------------------------------------------------------------|----------|
| NM_026063 | ubiquinol-cytochrome c reductase complex assembly factor 2(Uqcc2)        | 1.829853 |
| NM_026085 | phenazine biosynthesis-like protein domain containing 2(Pbld2)           | 1.527001 |
| NM_026107 | zinc finger with KRAB and SCAN domains 6(Zkscan6)                        | 1.69052  |
| NM_026139 | armadillo repeat containing, X-linked 2(Armcx2)                          | 1.790972 |
| NM_026154 | mitochondrial ribosomal protein L10(Mrpl10)                              | 1.566686 |
| NM_026309 | LSM3 homolog, U6 small nuclear RNA and mRNA degradation associated(Lsm3) | 2.521697 |
| NM_026399 | WD repeat domain containing 83(Wdr83)                                    | 1.628346 |
| NM_026403 | NOP9 nucleolar protein(Nop9)                                             | 1.52554  |
| NM_026415 | cysteine rich tail 1(Cysrt1)                                             | 1.602984 |
| NM_026425 | N(alpha)-acetyltransferase 20, NatB catalytic subunit(Naa20)             | 1.809264 |
| NM_026461 | RIKEN cDNA 1700129C05 gene(1700129C05Rik)                                | 1.893286 |
| NM_026486 | tectonic family member 2(Tctn2)                                          | 1.846189 |
| NM_026490 | mitochondrial ribosomal protein L19(Mrpl19)                              | 2.13681  |
| NM_026503 | succinate dehydrogenase complex assembly factor 4(Sdhaf4)                | 1.910305 |
| NM_026527 | ChaC, cation transport regulator 2(Chac2)                                | 2.624093 |
| NM_026537 | No data                                                                  | 1.509355 |
| NM_026542 | solute carrier family 25, member 39(Slc25a39)                            | 1.782447 |
| NM_026616 | ribonuclease H2, subunit C(Rnaseh2c)                                     | 1.745698 |
| NM_026621 | WD repeat domain 86(Wdr86)                                               | 1.742873 |
| NM_026626 | EF-hand calcium binding domain 2(Efcab2)                                 | 1.602475 |
| NM_026924 | ovo like zinc finger 2(Ovol2)                                            | 1.702402 |
| NM_027853 | methyltransferase like 7B(Mettl7b)                                       | 1.973048 |
| NM_028333 | angiopoietin-like 1(Angptl1)                                             | 1.505888 |
| NM_028502 | ubiquitin-conjugating enzyme E2D 2B(Ube2d2b)                             | 1.886644 |
| NM_028513 | actin-related protein T2(Actrt2)                                         | 1.63084  |
| NM_029199 | spermatogenesis associated multipass transmembrane protein 4(Samt4)      | 2.06772  |
| NM_029376 | spermatogenesis associated glutamate (E)-rich protein 4A(Speer4a)        | 1.726999 |
| NM_029636 | cathepsin Q(Ctsq)                                                        | 1.820546 |
| NM_029703 | No data                                                                  | 2.009951 |
| NM_030254 | tumor suppressor candidate 3(Tusc3)                                      | 1.746672 |
| NM_030737 | vomer nasal 1 receptor 171(Vmn1r171)                                     | 1.816502 |
| NM_031379 | transketolase-like 1(Tktl1)                                              | 1.833494 |
| NM_031391 | general transcription factor II A, 1(Gtf2a1)                             | 1.905029 |
| NM_031493 | X-linked lymphocyte-regulated 5C(Xlr5c)                                  | 1.706422 |
| NM_032398 | plasmalemma vesicle associated protein(Plvap)                            | 2.012549 |
| NM_033041 | hairy and enhancer of split 7 (Drosophila)(Hes7)                         | 1.605795 |
| NM_033075 | DNA segment, Chr 17, human D6S56E 5(D17H6S56E-5)                         | 1.699253 |

|           |                                                                             |          |
|-----------|-----------------------------------------------------------------------------|----------|
| NM_053092 | lysyl-tRNA synthetase(Kars)                                                 | 1.702826 |
| S37484    | No data                                                                     | 1.887337 |
| S42582    | No data                                                                     | 1.822752 |
| S56976    | No data                                                                     | 2.675719 |
| S57880    | No data                                                                     | 1.881314 |
| S62964    | No data                                                                     | 2.776746 |
| S71188    | No data                                                                     | 1.676997 |
| S79250    | No data                                                                     | 1.886149 |
| U01919    | topoisomerase (DNA) II alpha(Top2a)                                         | 1.758754 |
| U03065    | defensin, alpha, 15(Defa15)                                                 | 1.850543 |
| U13371    | MyoD family inhibitor domain containing(Mdfic)                              | 1.630561 |
| U15443    | Ros1 proto-oncogene(Ros1)                                                   | 2.051654 |
| U16180    | No data                                                                     | 1.822552 |
| U20062    | No data                                                                     | 1.513441 |
| U22517    | No data                                                                     | 2.389063 |
| U23091    | No data                                                                     | 1.674815 |
| U24680    | No data                                                                     | 1.631069 |
| U26226    | No data                                                                     | 1.649975 |
| U26784    | No data                                                                     | 2.568228 |
| U26967    | cordons-bleu WH2 repeat(Cobl)                                               | 2.193983 |
| U28772    | No data                                                                     | 1.60633  |
| U33141    | No data                                                                     | 2.30015  |
| U35310    | No data                                                                     | 1.616775 |
| U37501    | laminin, alpha 5(Lama5)                                                     | 1.672903 |
| U38503    | guanine nucleotide binding protein, alpha stimulating, olfactory type(Gnal) | 1.690312 |
| U43721    | cystathionine beta-synthase(Cbs)                                            | 1.628683 |
| U50955    | No data                                                                     | 2.120217 |
| U51457    | immunoglobulin heavy variable 7-3(Ighv7-3)                                  | 1.890918 |
| U51744    | TEA domain family member 4(Tead4)                                           | 1.554796 |
| U54563    | eukaryotic translation initiation factor 3, subunit E(Eif3e)                | 1.950378 |
| U55178    | TCDD-inducible poly(ADP-ribose) polymerase(Tiparp)                          | 2.020159 |
| U55480    | No data                                                                     | 1.536172 |
| U57611    | CD44 antigen(Cd44)                                                          | 1.673655 |
| U59490    | No data                                                                     | 1.651595 |
| U61283    | proteasome (prosome, macropain) 26S subunit, ATPase 2(Psmc2)                | 2.097479 |
| U62907    | zinc finger with KRAB and SCAN domains 5(Zkscan5)                           | 1.796787 |
| U63774    | No data                                                                     | 1.73606  |
| U65020    | dentin matrix protein 1(Dmp1)                                               | 1.573229 |
| U66835    | Sec24 related gene family, member B (S. cerevisiae)(Sec24b)                 | 2.445131 |
| U67885    | transformation related protein 53 binding protein 1(Trp53bp1)               | 1.54916  |

|        |                                                                     |          |
|--------|---------------------------------------------------------------------|----------|
| U86733 | No data                                                             | 1.766578 |
| U87814 | proline-serine-threonine phosphatase-interacting protein 1(Pstpip1) | 1.874272 |
| U89415 | eukaryotic translation elongation factor 2(Eef2)                    | 1.93134  |
| U89416 | eukaryotic translation elongation factor 2(Eef2)                    | 1.509138 |
| U89424 | unc-93 homolog B1 (C. elegans)(Unc93b1)                             | 1.876516 |
| U89889 | hemopexin(Hpx)                                                      | 1.528599 |
| U91922 | DEAH (Asp-Glu-Ala-His) box polypeptide 9(Dhx9)                      | 1.927691 |
| U94423 | myocyte enhancer factor 2A(Mef2a)                                   | 2.380811 |
| W20726 | No data                                                             | 1.883439 |
| X03040 | eukaryotic translation initiation factor 4A1(Eif4a1)                | 1.604571 |
| X03384 | No data                                                             | 1.629075 |
| X14489 | thymidylate synthase(Tyms)                                          | 1.627556 |
| X14930 | No data                                                             | 1.512137 |
| X16200 | No data                                                             | 1.526875 |
| X16223 | No data                                                             | 1.782704 |
| X17176 | No data                                                             | 1.969887 |
| X17631 | No data                                                             | 1.933354 |
| X55507 | No data                                                             | 1.502776 |
| X55934 | No data                                                             | 1.77455  |
| X56029 | U3A small nuclear RNA(Rnu3a)                                        | 1.625033 |
| X57298 | mcf.2 transforming sequence(Mcf2)                                   | 2.882661 |
| X65704 | small nuclear ribonucleoprotein E(Snrpe)                            | 1.977796 |
| X66236 | No data                                                             | 1.581486 |
| X66901 | MKL/myocardin-like 2(Mkl2)                                          | 1.639779 |
| X67800 | No data                                                             | 1.610432 |
| X71128 | No data                                                             | 1.821073 |
| X71941 | No data                                                             | 2.139434 |
| X72796 | No data                                                             | 1.704486 |
| X73011 | No data                                                             | 1.780606 |
| X74590 | No data                                                             | 1.595133 |
| X75393 | No data                                                             | 2.108622 |
| X75395 | No data                                                             | 1.970617 |
| X76505 | discoidin domain receptor family, member 2(Ddr2)                    | 1.534094 |
| X76685 | No data                                                             | 1.809529 |
| X81716 | ribosomal protein L10 pseudogene(D11Bhm181e)                        | 1.560629 |
| X82561 | protein tyrosine phosphatase, non-receptor type 3(Ptpn3)            | 1.664887 |
| X83590 | ribosomal protein L5(Rpl5)                                          | 2.924707 |
| X83918 | No data                                                             | 1.967125 |
| X86367 | No data                                                             | 2.40117  |
| X89758 | No data                                                             | 1.801007 |

|        |                                                                    |          |
|--------|--------------------------------------------------------------------|----------|
| X96707 | differentially expressed in FDCP 8(Def8)                           | 1.743033 |
| X96708 | differentially expressed in FDCP 8(Def8)                           | 1.85864  |
| X96775 | No data                                                            | 1.73116  |
| X99249 | No data                                                            | 1.7824   |
| X99508 | No data                                                            | 1.629333 |
| X99713 | histone cell cycle regulator(Hira)                                 | 2.24147  |
| Y08382 | disabled 1(Dab1)                                                   | 2.542487 |
| Y10969 | No data                                                            | 2.868802 |
| Y11811 | No data                                                            | 1.889405 |
| Y11896 | No data                                                            | 2.168927 |
| Y15243 | No data                                                            | 1.741797 |
| Y16518 | LanC (bacterial lantibiotic synthetase component C)-like 1(Lancl1) | 1.958267 |
| Y17853 | SET and MYND domain containing 4(Smyd4)                            | 1.731024 |
| Z12176 | No data                                                            | 1.737576 |
| Z12191 | No data                                                            | 2.97484  |
| Z12192 | No data                                                            | 1.926209 |
| Z12199 | No data                                                            | 2.904638 |
| Z12209 | No data                                                            | 1.526711 |
| Z12265 | No data                                                            | 2.34689  |
| Z12276 | No data                                                            | 1.898323 |
| Z12279 | No data                                                            | 1.643974 |
| Z12376 | No data                                                            | 1.576778 |
| Z12383 | No data                                                            | 1.529326 |
| Z12386 | No data                                                            | 1.865929 |
| Z12416 | No data                                                            | 1.555298 |
| Z12421 | No data                                                            | 1.527737 |
| Z12438 | No data                                                            | 1.503206 |
| Z12447 | No data                                                            | 2.176764 |
| Z12453 | No data                                                            | 2.854881 |
| Z12461 | No data                                                            | 1.860531 |
| Z12465 | No data                                                            | 1.984374 |
| Z12502 | No data                                                            | 1.79247  |
| Z12541 | No data                                                            | 2.07367  |
| Z12542 | No data                                                            | 2.27893  |
| Z12550 | No data                                                            | 2.206113 |
| Z12571 | No data                                                            | 1.833658 |
| Z12578 | No data                                                            | 1.598206 |
| Z12586 | No data                                                            | 2.070631 |
| Z27088 | relaxin 1(Rln1)                                                    | 1.640721 |
| Z48768 | No data                                                            | 2.25356  |

## Complete list of genes down-regulated by GNS treatment

| Gene Id  | Gene                                                                 | Z-score  |
|----------|----------------------------------------------------------------------|----------|
| AA497620 | No data                                                              | -1.61414 |
| AA517284 | No data                                                              | -2.73572 |
| AA518955 | No data                                                              | -1.65917 |
| AB006361 | prostaglandin D2 synthase (brain)(Ptgds)                             | -1.97426 |
| AB010309 | zinc finger protein 566(Zfp566)                                      | -1.82735 |
| AB010329 | zinc finger protein 715(Zfp715)                                      | -1.87064 |
| AB010336 | zinc finger protein 157(Zfp157)                                      | -1.99885 |
| AB010339 | predicted gene 9805(Gm9805)                                          | -1.78414 |
| AB010342 | zinc finger protein 950(Zfp950)                                      | -2.1267  |
| AB010351 | zinc finger protein 738(Zfp738)                                      | -2.56028 |
| AB010373 | zinc finger protein 975(Zfp975)                                      | -1.79849 |
| AB015423 | deltex 2, E3 ubiquitin ligase(Dtx2)                                  | -2.60317 |
| AB015425 | deltex 3, E3 ubiquitin ligase(Dtx3)                                  | -2.26013 |
| AB016248 | sterol-C5-desaturase(Sc5d)                                           | -1.53275 |
| AB017092 | No data                                                              | -1.52432 |
| AB018421 | cytochrome P450, family 4, subfamily a, polypeptide 10(Cyp4a10)      | -1.93229 |
| AB023299 | No data                                                              | -1.74633 |
| AB030242 | No data                                                              | -2.14427 |
| AB035508 | melanoma cell adhesion molecule(Mcam)                                | -1.79406 |
| AB040489 | coiled-coil domain containing 47(Ccdc47)                             | -1.99482 |
| AB041543 | KRAB-A domain containing 1(Krba1)                                    | -2.12333 |
| AB041576 | nudix (nucleoside diphosphate linked moiety X)-type motif 11(Nudt11) | -1.86508 |
| AB041594 | akirin 1(Akirin1)                                                    | -1.83639 |
| AB041652 | zinc finger protein 706(Zfp706)                                      | -1.86996 |
| AB041660 | fibronectin type III domain containing 10(Fndc10)                    | -1.67022 |
| AB042408 | G-protein coupled receptor 88(Gpr88)                                 | -2.46714 |
| AB047552 | endoplasmic reticulum aminopeptidase 1(Erap1)                        | -1.52755 |
| AB049641 | mitochondrial ribosomal protein L13(Mrpl13)                          | -3.0156  |
| AB051897 | No data                                                              | -1.70589 |
| AB061228 | olfactory receptor 73(Olfr73)                                        | -2.25584 |
| AB061518 | calpain 8(Capn8)                                                     | -3.66012 |
| AF003330 | No data                                                              | -2.43038 |
| AF003352 | RIKEN cDNA 3110002H16 gene(3110002H16Rik)                            | -1.5779  |
| AF004401 | No data                                                              | -1.5139  |
| AF007267 | phosphomannomutase 1(Pmm1)                                           | -2.05812 |
| AF013576 | No data                                                              | -1.96279 |
| AF015203 | Ig heavy chain Mem5-like(LOC641025)                                  | -2.40672 |



|          |                                                                      |          |
|----------|----------------------------------------------------------------------|----------|
| AF015211 | No data                                                              | -1.55049 |
| AF015219 | Ig heavy chain Mem5-like(LOC641025)                                  | -1.70685 |
| AF019249 | N-myc (and STAT) interactor(Nmi)                                     | -1.81494 |
| AF022811 | cornichon family AMPA receptor auxiliary protein 1(Cnih1)            | -1.78501 |
| AF027301 | No data                                                              | -1.66392 |
| AF029740 | No data                                                              | -1.91405 |
| AF029745 | No data                                                              | -2.20735 |
| AF031634 | No data                                                              | -1.60621 |
| AF031635 | No data                                                              | -2.18155 |
| AF036898 | polymerase (DNA directed), epsilon 2 (p59 subunit)(Pole2)            | -2.0439  |
| AF037046 | thiopurine S-methyltransferase pseudogene(Gm8479)                    | -1.71241 |
| AF038500 | guanylate cyclase 1, soluble, beta 2(Gucy1b2)                        | -1.60677 |
| AF038507 | RIKEN cDNA 2010204K13 gene(2010204K13Rik)                            | -1.57193 |
| AF038896 | phosphodiesterase 4D, cAMP specific(Pde4d)                           | -1.6101  |
| AF039064 | secretoglobin, family 1B, member 27(Scgb1b27)                        | -1.77898 |
| AF039405 | arsA arsenite transporter, ATP-binding, homolog 1 (bacterial)(Asna1) | -1.83019 |
| AF041930 | No data                                                              | -1.97155 |
| AF045485 | immunoglobulin heavy variable 9-4(Ighv9-4)                           | -1.59219 |
| AF045505 | No data                                                              | -2.62735 |
| AF055896 | paired-Ig-like receptor A11(Pira11)                                  | -1.51103 |
| AF059703 | No data                                                              | -1.73502 |
| AF071183 | No data                                                              | -2.52151 |
| AF071754 | No data                                                              | -2.09618 |
| AF085221 | No data                                                              | -2.07269 |
| AF090374 | gamma-aminobutyric acid (GABA) A receptor, subunit alpha 5(Gabra5)   | -1.62489 |
| AF093554 | No data                                                              | -1.55581 |
| AF093562 | No data                                                              | -2.07571 |
| AF095936 | succinate dehydrogenase complex, subunit B, iron sulfur (Ip)(Sdhb)   | -1.52561 |
| AF098796 | No data                                                              | -2.16833 |
| AF099805 | No data                                                              | -1.7954  |
| AF113599 | pregnancy-specific glycoprotein 23(Psg23)                            | -1.69115 |
| AF113618 | No data                                                              | -2.25716 |
| AF127458 | No data                                                              | -1.69048 |
| AF131194 | No data                                                              | -2.03974 |
| AF133733 | No data                                                              | -2.15699 |
| AF144896 | No data                                                              | -1.53203 |
| AF146224 | high mobility group 20B(Hmg20b)                                      | -2.0964  |
| AF146569 | G protein-regulated inducer of neurite outgrowth 1(Gprin1)           | -3.62998 |
| AF156890 | growth differentiation factor 2(Gdf2)                                | -2.3381  |

|          |                                                                               |          |
|----------|-------------------------------------------------------------------------------|----------|
| AF159256 | RAN, member RAS oncogene family(Ran)                                          | -1.89488 |
| AF159856 | solute carrier family 38, member 3(Slc38a3)                                   | -1.62234 |
| AF165984 | Iroquois related homeobox 1 (Drosophila)(Irx1)                                | -2.55729 |
| AF172276 | aldehyde oxidase 3(Aox3)                                                      | -1.54188 |
| AF178753 | olfactory receptor 1077, pseudogene 1(Olfr1077-ps1)                           | -1.6809  |
| AF184895 | protease, serine 28(Prss28)                                                   | -1.76559 |
| AF190624 | yippee-like 1 (Drosophila)(Ypel1)                                             | -1.55492 |
| AF194028 | histidine-rich glycoprotein(Hrg)                                              | -1.83871 |
| AF194970 | centromere protein F(Cenpf)                                                   | -1.77465 |
| AF195056 | sortilin-related VPS10 domain containing receptor 1(Sorcs1)                   | -1.66095 |
| AF197159 | cubilin (intrinsic factor-cobalamin receptor)(Cubn)                           | -1.7522  |
| AF201961 | No data                                                                       | -1.52547 |
| AF204175 | popeye domain containing 2(Popdc2)                                            | -1.52828 |
| AF218416 | tocopherol (alpha) transfer protein(Ttpa)                                     | -2.62534 |
| AF220134 | tripartite motif-containing 16(Trim16)                                        | -1.70845 |
| AF220156 | No data                                                                       | -2.20216 |
| AF220209 | Nedd4 family interacting protein 1(Ndfip1)                                    | -1.53748 |
| AF220524 | DNA (cytosine-5-)-methyltransferase 3-like(Dnmt3l)                            | -1.5817  |
| AF233885 | phospholipase C, epsilon 1(Plce1)                                             | -2.14665 |
| AF237627 | leiomodulin 1 (smooth muscle)(Lmod1)                                          | -1.60376 |
| AF238284 | No data                                                                       | -1.79879 |
| AF240178 | No data                                                                       | -2.52726 |
| AF248056 | No data                                                                       | -2.24753 |
| AF250145 | IZUMO1 receptor, JUNO(Izumo1r)                                                | -2.38177 |
| AF255911 | junction adhesion molecule 2(Jam2)                                            | -1.74042 |
| AF256217 | E74-like factor 2(Elf2)                                                       | -2.16499 |
| AF261233 | solute carrier family 8 (sodium/lithium/calcium exchanger), member B1(Slc8b1) | -1.59861 |
| AF266505 | pseudouridine synthase 3(Pus3)                                                | -1.63702 |
| AF278712 | allantoicase(Allc)                                                            | -1.94231 |
| AF281047 | tripartite motif-containing 8(Trim8)                                          | -2.00388 |
| AF282287 | No data                                                                       | -2.32061 |
| AF282294 | No data                                                                       | -2.72889 |
| AF283667 | phosphoglycerate mutase 1(Pgam1)                                              | -3.58305 |
| AF285112 | TBC1 domain family, member 10b(Tbc1d10b)                                      | -1.97905 |
| AF288379 | killer cell lectin-like receptor subfamily A, member 20(Klra20)               | -2.33987 |
| AF290570 | No data                                                                       | -1.87761 |
| AF291505 | No data                                                                       | -1.58548 |
| AF293081 | No data                                                                       | -2.31697 |
| AF301017 | chemokine (C-X-C motif) ligand 16(Cxcl16)                                     | -1.65694 |
| AF307844 | LIM domain and actin binding 1(Lima1)                                         | -1.77169 |

|          |                                                                                             |                |
|----------|---------------------------------------------------------------------------------------------|----------------|
| AF309124 | No data                                                                                     | -2.30645       |
| AF309649 | interferon gamma inducible protein 30(Ifi30)                                                | -1.50004       |
| AF310251 | pleckstrin homology domain interacting protein(Phip)                                        | -1.94379       |
| AF316990 | No data                                                                                     | -1.51617       |
| AF316991 | No data                                                                                     | -1.82178       |
| AF322238 | cell division cycle associated 4(Cdca4)                                                     | -1.65094       |
| AF334104 | DEAD (Asp-Glu-Ala-Asp) box polypeptide 50(Ddx50)                                            | -2.36175       |
| AF336862 | reticulon 4 interacting protein 1(Rtn4ip1)                                                  | -2.63494       |
| AF348615 | No data                                                                                     | -2.05108       |
| AF348968 | UDP-N-acetyl-alpha-D-galactosamine:polypeptide<br>acetylgalactosaminyltransferase 2(Galnt2) | N-<br>-1.66035 |
| AF356627 | coagulation factor XI(F11)                                                                  | -2.25824       |
| AF357361 | U11 small nuclear RNA(Rnu11)                                                                | -2.22505       |
| AF357390 | small nucleolar RNA, H/ACA box 3(Snora3)                                                    | -1.78499       |
| AF357399 | snoRNA AF357399(AF357399)                                                                   | -2.1709        |
| AF357402 | small Cajal body-specific RNA 8(Scarna8)                                                    | -1.87057       |
| AF357423 | small nucleolar RNA, H/ACA box 35(Snora35)                                                  | -2.01193       |
| AF357462 | No data                                                                                     | -1.53006       |
| AF357489 | No data                                                                                     | -1.6681        |
| AF357497 | No data                                                                                     | -1.72929       |
| AF357510 | No data                                                                                     | -1.75713       |
| AF367760 | syntrophin, gamma 2(Sntg2)                                                                  | -1.65944       |
| AF369896 | No data                                                                                     | -2.16465       |
| AF373408 | CD209a antigen(Cd209a)                                                                      | -2.72442       |
| AF378761 | plexin domain containing 2(Plxdc2)                                                          | -1.87336       |
| AF405692 | adhesion G protein-coupled receptor V1(Adgrv1)                                              | -3.23673       |
| AF408408 | sorting nexin 18(Snx18)                                                                     | -1.78608       |
| AF410461 | retinal pigment epithelium 65(Rpe65)                                                        | -1.95555       |
| AF411055 | immunoglobulin superfamily, member 8(Igsf8)                                                 | -2.10123       |
| AI505940 | No data                                                                                     | -1.89944       |
| AJ000488 | No data                                                                                     | -2.26935       |
| AJ006837 | small nucleolar RNA host gene 3(Snhg3)                                                      | -1.67975       |
| AJ009781 | interferon induced transmembrane protein 5(Ifitm5)                                          | -1.56481       |
| AJ132675 | No data                                                                                     | -1.7862        |
| AJ229172 | No data                                                                                     | -1.86423       |
| AJ231204 | No data                                                                                     | -1.55894       |
| AJ231216 | No data                                                                                     | -2.32017       |
| AJ231227 | No data                                                                                     | -1.95056       |
| AJ231262 | No data                                                                                     | -1.52516       |
| AJ231275 | No data                                                                                     | -2.11843       |
| AJ231276 | No data                                                                                     | -1.77778       |

|          |                                                                                                        |          |
|----------|--------------------------------------------------------------------------------------------------------|----------|
| AJ236880 | tenascin C(Tnc)                                                                                        | -1.62796 |
| AJ242721 | ring finger protein 8(Rnf8)                                                                            | -2.48099 |
| AJ242954 | No data                                                                                                | -2.02826 |
| AJ245456 | No data                                                                                                | -1.54552 |
| AJ250189 | ring finger protein 31(Rnf31)                                                                          | -2.35814 |
| AJ250692 | No data                                                                                                | -1.94583 |
| AJ271055 | Iroquois related homeobox 6 (Drosophila)(Irx6)                                                         | -1.76845 |
| AJ272393 | No data                                                                                                | -1.88069 |
| AJ276004 | elongator acetyltransferase complex subunit 4(Elp4)                                                    | -2.28837 |
| AJ278073 | No data                                                                                                | -1.66905 |
| AJ278080 | No data                                                                                                | -1.78325 |
| AJ279839 | casein kinase 1, gamma 3(Csnk1g3)                                                                      | -2.20414 |
| AJ299405 | interferon-induced protein 44(lfi44)                                                                   | -1.70694 |
| AJ308965 | PC4 and SFRS1 interacting protein 1(Psip1)                                                             | -2.42811 |
| AJ344340 | CTD (carboxy-terminal domain, RNA polymerase II, polypeptide A) small phosphatase-like(Ctdspl)         | -1.66852 |
| AJ409462 | No data                                                                                                | -2.84641 |
| AJ409470 | No data                                                                                                | -2.08954 |
| AJ409490 | No data                                                                                                | -2.49103 |
| AJ409505 | No data                                                                                                | -2.30447 |
| AJ414562 | gap junction protein, delta 4(Gjd4)                                                                    | -1.65523 |
| AK002310 | aph1 homolog C, gamma secretase subunit(Aph1c)                                                         | -1.84027 |
| AK002371 | small nuclear ribonucleoprotein 40 (U5)(Snrnp40)                                                       | -1.60049 |
| AK002417 | RIKEN cDNA 0610009K14 gene(0610009K14Rik)                                                              | -1.9995  |
| AK002471 | endoplasmic reticulum lectin 1(Erlec1)                                                                 | -2.21851 |
| AK002512 | cysteine-rich transmembrane module containing 1(Cystm1)                                                | -2.00894 |
| AK002660 | Rho GTPase activating protein 24(Arhgap24)                                                             | -2.45713 |
| AK002682 | methyltransferase like 15(Mettl15)                                                                     | -1.62634 |
| AK002778 | eukaryotic translation initiation factor 3, subunit F(Eif3f)                                           | -1.51007 |
| AK002805 | TBC1 domain family, member 22B, opposite strand(Tbc1d22bos)                                            | -1.50362 |
| AK002854 | hydrogen voltage-gated channel 1(Hvcn1)                                                                | -2.35589 |
| AK002997 | reticulon 1(Rtn1)                                                                                      | -1.66317 |
| AK003097 | RIKEN cDNA 1810043G02 gene(1810043G02Rik)                                                              | -1.59685 |
| AK003167 | a disintegrin-like and metallopeptidase (reprolysin type) with thrombospondin type 1 motif, 3(Adamts3) | -2.15796 |
| AK003172 | desumoylating isopeptidase 1(Desi1)                                                                    | -2.15609 |
| AK003192 | mitochondrial ribosomal protein L58(Mrpl58)                                                            | -1.64503 |
| AK003351 | RIKEN cDNA 1110003F10 gene(1110003F10Rik)                                                              | -2.53109 |
| AK003432 | exportin, tRNA (nuclear export receptor for tRNAs)(Xpot)                                               | -1.66802 |
| AK003461 | ets variant 5(Etv5)                                                                                    | -1.50618 |
| AK003491 | RIKEN cDNA 1110006E14 gene(1110006E14Rik)                                                              | -2.35189 |

|          |                                                                                          |          |
|----------|------------------------------------------------------------------------------------------|----------|
| AK003524 | arylsulfatase B(Arsb)                                                                    | -1.66659 |
| AK003546 | CAP-GLY domain containing linker protein 1(Clip1)                                        | -1.69135 |
| AK003657 | zinc finger, MYND-type containing 8(Zmynd8)                                              | -1.68036 |
| AK003796 | WD repeat domain, phosphoinositide interacting 2(Wipi2)                                  | -1.93227 |
| AK003840 | desmocollin 1(Dsc1)                                                                      | -1.99085 |
| AK003850 | proline rich 13(Prr13)                                                                   | -1.59231 |
| AK003991 | nudix (nucleoside diphosphate linked moiety X)-type motif 14(Nudt14)                     | -1.6767  |
| AK004046 | arginine glutamic acid dipeptide (RE) repeats(Rere)                                      | -1.71288 |
| AK004069 | TAO kinase 2(Taok2)                                                                      | -1.91618 |
| AK004084 | SMEK homolog 1, suppressor of mek1 (Dictyostelium)(Smek1)                                | -3.01805 |
| AK004085 | CREB/ATF bZIP transcription factor(Crebzf)                                               | -1.90981 |
| AK004108 | RIKEN cDNA 1110035E04 gene(1110035E04Rik)                                                | -2.09075 |
| AK004122 | tetraspanin 15(Tspan15)                                                                  | -1.75622 |
| AK004184 | nexilin(Nexn)                                                                            | -3.64276 |
| AK004187 | kelch-like 24(Klhl24)                                                                    | -2.15408 |
| AK004221 | Foxf1 adjacent non-coding developmental regulatory RNA(Fendrr)                           | -1.53066 |
| AK004234 | autophagy related 13(Atg13)                                                              | -1.93864 |
| AK004254 | ankyrin repeat domain 46(Ankrd46)                                                        | -1.84404 |
| AK004259 | zinc finger, HIT type 3(Znhit3)                                                          | -1.69949 |
| AK004339 | SR-related CTD-associated factor 11(Scaf11)                                              | -2.17996 |
| AK004387 | dynein, axonemal, intermediate chain 1(Dnaic1)                                           | -2.18385 |
| AK004445 | zinc and ring finger 2(Znrf2)                                                            | -1.78265 |
| AK004446 | Ssu72 RNA polymerase II CTD phosphatase homolog (yeast)(Ssu72)                           | -1.57773 |
| AK004537 | RIKEN cDNA 1110018N20 gene(1110018N20Rik)                                                | -1.65534 |
| AK004622 | solute carrier family 9 (sodium/hydrogen exchanger), member 8(Slc9a8)                    | -1.60687 |
| AK004632 | golgi associated, gamma adaptin ear containing, ARF binding protein 2(Gga2)              | -2.65612 |
| AK004654 | synapse defective 1, Rho GTPase, homolog 1 (C. elegans)(Syde1)                           | -1.74193 |
| AK004770 | zinc finger CCCH type, antiviral 1(Zc3hav1)                                              | -1.55663 |
| AK004785 | protein phosphatase 1, regulatory (inhibitor) subunit 12A(Ppp1r12a)                      | -1.59693 |
| AK004807 | kallikrein related-peptidase 9(Kik9)                                                     | -1.67911 |
| AK005010 | von Willebrand factor C and EGF domains(Vwce)                                            | -1.55016 |
| AK005036 | threonine aldolase 1(Tha1)                                                               | -1.73381 |
| AK005050 | dihydrodiol dehydrogenase (dimeric)(Dhdh)                                                | -1.68883 |
| AK005070 | solute carrier family 25 (mitochondrial carrier, citrate transporter), member 1(Slc25a1) | -1.90302 |

|          |                                                                           |          |
|----------|---------------------------------------------------------------------------|----------|
| AK005124 | glutamate decarboxylase 1, opposite strand(Gad1os)                        | -1.51473 |
| AK005217 | carbohydrate (N-acetylgalactosamine 4-0) sulfotransferase 8(Chst8)        | -2.1738  |
| AK005238 | suppressor of cytokine signaling 6(Socs6)                                 | -1.67131 |
| AK005257 | zinc finger protein 580(Zfp580)                                           | -1.86014 |
| AK005299 | RIKEN cDNA 1500026H17 gene(1500026H17Rik)                                 | -1.6079  |
| AK005327 | transmembrane protein 41B(Tmem41b)                                        | -2.49243 |
| AK005338 | sorting nexin 15(Snx15)                                                   | -1.83016 |
| AK005342 | MIT, microtubule interacting and transport, domain containing 1(Mitd1)    | -2.16806 |
| AK005386 | zinc finger, FYVE domain containing 19(Zfyve19)                           | -1.86143 |
| AK005419 | cytochrome b-561 domain containing 1(Cyb561d1)                            | -2.77191 |
| AK005541 | tRNA 5-methylaminomethyl-2-thiouridylate methyltransferase(Trmu)          | -1.55627 |
| AK005545 | pregnancy-specific glycoprotein 21(Psg21)                                 | -1.62668 |
| AK005575 | RIKEN cDNA 1700001C07 gene(1700001C07Rik)                                 | -1.8453  |
| AK005582 | cytochrome c, testis(Cyct)                                                | -2.14699 |
| AK005623 | RAB3 GTPase activating protein subunit 1(Rab3gap1)                        | -2.53388 |
| AK005714 | heat shock protein, alpha-crystallin-related, B9(Hspb9)                   | -2.65559 |
| AK005748 | small integral membrane protein 23(Smim23)                                | -1.70838 |
| AK005752 | RIKEN cDNA 1700008B11 gene(1700008B11Rik)                                 | -1.52807 |
| AK005774 | RIKEN cDNA 1700008J07 gene(1700008J07Rik)                                 | -2.34173 |
| AK005786 | RIKEN cDNA 1700008P02 gene(1700008P02Rik)                                 | -1.53924 |
| AK005828 | RIKEN cDNA 1700010I02 gene(1700010I02Rik)                                 | -1.6546  |
| AK005835 | kelch repeat and BTB (POZ) domain containing 8, opposite strand(Kbtbd8os) | -1.82537 |
| AK005882 | DNA-damage inducible 1(Ddi1)                                              | -2.06161 |
| AK005898 | RIKEN cDNA 1700012D14 gene(1700012D14Rik)                                 | -1.54857 |
| AK005901 | RIKEN cDNA 1700012E03 gene(1700012E03Rik)                                 | -1.95496 |
| AK005977 | RIKEN cDNA 1700014F14 gene(1700014F14Rik)                                 | -1.90665 |
| AK005987 | RIKEN cDNA 1700015C17 gene(1700015C17Rik)                                 | -1.5096  |
| AK006004 | RIKEN cDNA 1700015P03 gene(1700015P03Rik)                                 | -1.51595 |
| AK006010 | RIKEN cDNA 1700016B01 gene(1700016B01Rik)                                 | -1.5329  |
| AK006043 | septin 14(Sept14)                                                         | -1.60571 |
| AK006045 | RIKEN cDNA 1700016L04 gene(1700016L04Rik)                                 | -2.4665  |
| AK006053 | RIKEN cDNA 1700016P22 gene(1700016P22Rik)                                 | -1.81719 |
| AK006108 | RIKEN cDNA 1700019B21 gene(1700019B21Rik)                                 | -1.73488 |
| AK006123 | RIKEN cDNA 1700019H22 gene(1700019H22Rik)                                 | -1.82483 |
| AK006132 | NFX-like protein(1700019M22Rik)                                           | -1.83607 |
| AK006146 | malic enzyme 3, NADP(+)-dependent, mitochondrial(Me3)                     | -2.72813 |
| AK006223 | RIKEN cDNA 1700021N20 gene(1700021N20Rik)                                 | -1.63398 |
| AK006224 | RIKEN cDNA 1700021N21 gene(1700021N21Rik)                                 | -1.63498 |

|          |                                                                   |          |
|----------|-------------------------------------------------------------------|----------|
| AK006234 | centromere protein P(Cenpp)                                       | -1.88182 |
| AK006258 | phosphatidylethanolamine binding protein 2(Pbp2)                  | -1.54565 |
| AK006357 | sperm acrosome associated 3(Spaca3)                               | -1.63296 |
| AK006367 | zinc finger SWIM-type containing 2(Zswim2)                        | -2.23758 |
| AK006375 | cilia and flagella associated protein 161(Cfap161)                | -2.20187 |
| AK006506 | RIKEN cDNA 1700029K24 gene(1700029K24Rik)                         | -1.9142  |
| AK006555 | embryonic testis differentiation(Etd)                             | -3.05491 |
| AK006584 | RIKEN cDNA 1700123O21 gene(1700123O21Rik)                         | -1.93239 |
| AK006701 | RIKEN cDNA 1700046C09 gene(1700046C09Rik)                         | -1.53443 |
| AK006705 | Rpgrip1-like(Rpgrip1l)                                            | -1.91931 |
| AK006719 | RIKEN cDNA 1700047N06 gene(1700047N06Rik)                         | -2.04056 |
| AK006720 | RIKEN cDNA 1700047O18 gene(1700047O18Rik)                         | -1.83432 |
| AK006721 | RIKEN cDNA 1700048B10 gene(1700048B10Rik)                         | -1.71531 |
| AK006729 | RIKEN cDNA 1700048J15 gene(1700048J15Rik)                         | -1.95768 |
| AK006785 | RIKEN cDNA 1700054M17 gene(1700054M17Rik)                         | -1.85063 |
| AK006802 | testis, prostate and placenta expressed(Tepp)                     | -1.61712 |
| AK006841 | membrane-spanning 4-domains, subfamily A, member 13(Ms4a13)       | -1.69049 |
| AK006854 | RIKEN cDNA 1700061I17 gene(1700061I17Rik)                         | -1.72076 |
| AK006859 | RIKEN cDNA 1700061N14 gene(1700061N14Rik)                         | -2.14795 |
| AK006870 | RIKEN cDNA 1700063H06 gene(1700063H06Rik)                         | -1.61199 |
| AK006885 | DENN/MADD domain containing 4C(Dennd4c)                           | -2.01367 |
| AK006894 | RIKEN cDNA 1700065J11 gene(1700065J11Rik)                         | -1.88636 |
| AK006899 | RIKEN cDNA 1700066B17 gene(1700066B17Rik)                         | -2.06272 |
| AK006906 | RIKEN cDNA 1700066M21 gene(1700066M21Rik)                         | -1.63061 |
| AK006934 | RIKEN cDNA 1700072B07 gene(1700072B07Rik)                         | -2.25946 |
| AK006950 | RIKEN cDNA 1700074L02 gene(1700074L02Rik)                         | -2.31866 |
| AK006973 | RIKEN cDNA 1700081N11 gene(1700081N11Rik)                         | -1.7105  |
| AK006975 | spermatogenesis associated glutamate (E)-rich protein 4B(Speer4b) | -1.74028 |
| AK006981 | RIKEN cDNA 1700082O11 gene(1700082O11Rik)                         | -1.52534 |
| AK007092 | RIKEN cDNA 1700096J18 gene(1700096J18Rik)                         | -1.69041 |
| AK007095 | RIKEN cDNA 1700096P03 gene(1700096P03Rik)                         | -1.84789 |
| AK007103 | RIKEN cDNA 1700100M05 gene(1700100M05Rik)                         | -1.8344  |
| AK007126 | RIKEN cDNA 1700105G05 gene(1700105G05Rik)                         | -2.30392 |
| AK007137 | RIKEN cDNA 4931431B13 gene(4931431B13Rik)                         | -1.7218  |
| AK007195 | RIKEN cDNA 1700113H08 gene(1700113H08Rik)                         | -2.62194 |
| AK007204 | RIKEN cDNA 1700116H05 gene(1700116H05Rik)                         | -1.57286 |
| AK007207 | RIKEN cDNA 1700119H24 gene(1700119H24Rik)                         | -1.61039 |
| AK007213 | RIKEN cDNA 1700120E02 gene(1700120E02Rik)                         | -1.53251 |
| AK007217 | RIKEN cDNA 1700120G11 gene(1700120G11Rik)                         | -2.18201 |
| AK007236 | RIKEN cDNA 1700122D07 gene(1700122D07Rik)                         | -2.61711 |

|          |                                                                         |          |
|----------|-------------------------------------------------------------------------|----------|
| AK007246 | WD repeat domain 38(Wdr38)                                              | -1.88795 |
| AK007272 | RIKEN cDNA 1700124M09 gene(1700124M09Rik)                               | -2.28588 |
| AK007290 | RIKEN cDNA 1700126H18 gene(1700126H18Rik)                               | -2.21499 |
| AK007294 | transformation related protein 53 target 5(Trp53tg5)                    | -1.84399 |
| AK007445 | tripartite motif-containing 15(Trim15)                                  | -1.55571 |
| AK007455 | small G protein signaling modulator 3(Sgsm3)                            | -1.65507 |
| AK007522 | prostaglandin reductase 2(Ptgr2)                                        | -1.60091 |
| AK007576 | RIKEN cDNA 1810021M19 gene(1810021M19Rik)                               | -1.98609 |
| AK007608 | RIKEN cDNA 1810026J23 gene(1810026J23Rik)                               | -1.84468 |
| AK007661 | RIKEN cDNA 1810030O07 gene(1810030O07Rik)                               | -1.68019 |
| AK007695 | Tp53rk binding protein(Tprkb)                                           | -1.70828 |
| AK007736 | dual-specificity tyrosine-(Y)-phosphorylation regulated kinase 2(Dyrk2) | -1.72678 |
| AK007844 | coiled-coil-helix-coiled-coil-helix domain containing 7(Chchd7)         | -1.91816 |
| AK007908 | calmodulin binding transcription activator 1(Camta1)                    | -1.68843 |
| AK007938 | RIKEN cDNA 1810062O18 gene(1810062O18Rik)                               | -1.61578 |
| AK007958 | No data                                                                 | -1.80423 |
| AK008031 | glutamatic-oxaloacetic transaminase 2, mitochondrial(Got2)              | -1.61639 |
| AK008066 | RNA binding motif protein 20(Rbm20)                                     | -2.62517 |
| AK008070 | eukaryotic translation initiation factor 1A domain containing(Eif1ad)   | -2.47846 |
| AK008073 | small leucine-rich protein 1(Smlr1)                                     | -2.93238 |
| AK008152 | solute carrier family 7, member 6 opposite strand(Slc7a6os)             | -1.64915 |
| AK008166 | RIKEN cDNA 2010009K17 gene(2010009K17Rik)                               | -1.76878 |
| AK008190 | family with sequence similarity 210, member B(Fam210b)                  | -2.04297 |
| AK008330 | RIKEN cDNA 2010107C10 gene(2010107C10Rik)                               | -2.06318 |
| AK008366 | RIKEN cDNA 2010109K09 gene(2010109K09Rik)                               | -2.22494 |
| AK008378 | RIKEN cDNA 2010110E17 gene(2010110E17Rik)                               | -1.99593 |
| AK008392 | calcineurin-like EF hand protein 2(Chp2)                                | -1.8036  |
| AK008398 | E2F transcription factor 4(E2f4)                                        | -1.67968 |
| AK008469 | protein geranylgeranyltransferase type I, beta subunit(Pggt1b)          | -1.54176 |
| AK008598 | RIKEN cDNA 2010320O07 gene(2010320O07Rik)                               | -2.27475 |
| AK008740 | RIKEN cDNA 2210016L21 gene(2210016L21Rik)                               | -1.87057 |
| AK008781 | No data                                                                 | -1.70585 |
| AK008825 | Fas associated factor family member 2(Faf2)                             | -1.9037  |
| AK008833 | zinc finger protein 995(Zfp995)                                         | -2.34499 |
| AK008857 | RIKEN cDNA 2210408F21 gene(2210408F21Rik)                               | -1.85814 |
| AK008859 | RIKEN cDNA 2210408I21 gene(2210408I21Rik)                               | -1.80558 |
| AK008903 | RIKEN cDNA 2210411M09 gene(2210411M09Rik)                               | -1.79529 |
| AK008904 | serine palmitoyltransferase, small subunit A(Sptssa)                    | -2.90573 |
| AK008905 | RIKEN cDNA 2210412B16 gene(2210412B16Rik)                               | -1.7622  |
| AK008943 | secreted frizzled-related protein 1(Sfrp1)                              | -1.51145 |



|          |                                                                            |          |
|----------|----------------------------------------------------------------------------|----------|
| AK009002 | inositol polyphosphate-1-phosphatase(Inpp1)                                | -2.18487 |
| AK009006 | desmoplakin(Dsp)                                                           | -2.3284  |
| AK009042 | creatine kinase, mitochondrial 2(Ckmt2)                                    | -2.55397 |
| AK009091 | RIKEN cDNA 2310002F09 gene(2310002F09Rik)                                  | -1.7184  |
| AK009122 | RIKEN cDNA 2310003L06 gene(2310003L06Rik)                                  | -1.61416 |
| AK009154 | serine/threonine kinase 40(Stk40)                                          | -2.06103 |
| AK009173 | transmembrane protein 45A2(Tmem45a2)                                       | -2.09032 |
| AK009258 | DNA segment, Chr 16, ERATO Doi 472, expressed(D16Ertd472e)                 | -2.82203 |
| AK009268 | angiomin-like 1(Amotl1)                                                    | -3.24504 |
| AK009291 | disabled 2 interacting protein(Dab2ip)                                     | -1.54281 |
| AK009335 | RIKEN cDNA 2310014F06 gene(2310014F06Rik)                                  | -2.92196 |
| AK009374 | carboxymethylenebutenolidase-like (Pseudomonas)(Cmb1)                      | -2.57459 |
| AK009401 | cytochrome c oxidase assembly protein 14(Cox14)                            | -1.89538 |
| AK009447 | charged multivesicular body protein 3(Chmp3)                               | -2.63665 |
| AK009494 | RIKEN cDNA 2310024H09 gene(2310024H09Rik)                                  | -1.59511 |
| AK009582 | polybromo 1(Pbrm1)                                                         | -1.78916 |
| AK009705 | RIKEN cDNA 2310039L15 gene(2310039L15Rik)                                  | -2.03544 |
| AK009716 | family with sequence similarity 83, member G(Fam83g)                       | -1.89643 |
| AK009724 | RIKEN cDNA 2310040G24 gene(2310040G24Rik)                                  | -1.58143 |
| AK009798 | leucine rich repeat containing 27(Lrrc27)                                  | -1.91286 |
| AK009878 | thioredoxin domain containing 15(Txndc15)                                  | -1.73684 |
| AK009960 | calmodulin regulated spectrin-associated protein family, member 3(Camsap3) | -1.8592  |
| AK010002 | coiled-coil domain containing 115(Ccdc115)                                 | -1.59192 |
| AK010044 | RIKEN cDNA 2310065F04 gene(2310065F04Rik)                                  | -2.47057 |
| AK010105 | abhydrolase domain containing 18(Abhd18)                                   | -2.44524 |
| AK010185 | peroxidasin(Pxdn)                                                          | -2.24214 |
| AK010187 | secretion associated Ras related GTPase 1B(Sar1b)                          | -1.63404 |
| AK010366 | mitochondrial assembly of ribosomal large subunit 1(Malsu1)                | -2.34627 |
| AK010386 | tudor domain containing 12(Tdrd12)                                         | -2.56275 |
| AK010393 | GPN-loop GTPase 1(Gpn1)                                                    | -1.67612 |
| AK010408 | No data                                                                    | -1.50985 |
| AK010427 | RIKEN cDNA 2410006H16 gene(2410006H16Rik)                                  | -1.9585  |
| AK010436 | pluripotency associated transcript 10(Platr10)                             | -2.03955 |
| AK010467 | RIKEN cDNA 2410012E07 gene(2410012E07Rik)                                  | -1.63964 |
| AK010524 | RIKEN cDNA 2410017I17 gene(2410017I17Rik)                                  | -1.5087  |
| AK010546 | ubiquitin specific peptidase 46(Usp46)                                     | -2.20188 |
| AK010588 | fibrosin-like 1(Fbrsl1)                                                    | -2.13688 |
| AK010671 | small nuclear ribonucleoprotein N(Snrpn)                                   | -2.23287 |
| AK010751 | MAP/microtubule affinity regulating kinase 4(Mark4)                        | -1.577   |
| AK010756 | small G protein signaling modulator 1(Sgsm1)                               | -1.62218 |

|          |                                                                                           |          |
|----------|-------------------------------------------------------------------------------------------|----------|
| AK010786 | tubulin, beta 2B class IIB(Tubb2b)                                                        | -2.50617 |
| AK010821 | family with sequence similarity 49, member A(Fam49a)                                      | -1.63379 |
| AK010890 | BRF1, RNA polymerase III transcription initiation factor 90 kDa subunit(Brf1)             | -1.55264 |
| AK010955 | RIKEN cDNA 2510010E17 gene(2510010E17Rik)                                                 | -1.76348 |
| AK010995 | MIS12 kinetochore complex component(Mis12)                                                | -1.68967 |
| AK011095 | RIKEN cDNA 2510042O18 gene(2510042O18Rik)                                                 | -1.66493 |
| AK011136 | DEAD (Asp-Glu-Ala-Asp) box polypeptide 56(Ddx56)                                          | -1.58943 |
| AK011343 | RIKEN cDNA 2610008E11 gene(2610008E11Rik)                                                 | -1.54542 |
| AK011392 | lysine (K)-specific methyltransferase 2B(Kmt2b)                                           | -1.6052  |
| AK011437 | POU domain, class 3, transcription factor 3 adjacent noncoding transcript 1(Pantr1)       | -2.36402 |
| AK011582 | RIKEN cDNA 2610028D06 gene(2610028D06Rik)                                                 | -1.69745 |
| AK011623 | transmembrane protein 65(Tmem65)                                                          | -1.66618 |
| AK011626 | family with sequence similarity 168, member A(Fam168a)                                    | -1.58861 |
| AK011725 | apoptosis-inducing, TAF9-like domain 1(Apitd1)                                            | -2.09534 |
| AK011759 | solute carrier family 25, member 32(Slc25a32)                                             | -2.10382 |
| AK011837 | mitochondrial ribosomal protein L41(Mrpl41)                                               | -1.80223 |
| AK011899 | tubulin-specific chaperone E(Tbce)                                                        | -1.6011  |
| AK011900 | coxsackie virus and adenovirus receptor(Cxadr)                                            | -1.69156 |
| AK011909 | SMG1 homolog, phosphatidylinositol 3-kinase-related kinase (C. elegans)(Smg1)             | -2.01508 |
| AK011939 | dehydrogenase/reductase (SDR family) member 13(Dhrs13)                                    | -2.36037 |
| AK011946 | RIKEN cDNA 2610300M13 gene(2610300M13Rik)                                                 | -2.09085 |
| AK011987 | fem-1 homolog c (C.elegans)(Fem1c)                                                        | -1.6334  |
| AK012084 | translocase of outer mitochondrial membrane 70 homolog A (yeast)(Tomm70a)                 | -1.57053 |
| AK012089 | No data                                                                                   | -1.51343 |
| AK012097 | centromere protein N(Cenpn)                                                               | -1.70244 |
| AK012134 | suppressor of Ty 7-like(Supt7l)                                                           | -1.64621 |
| AK012150 | ribosomal protein S6 kinase polypeptide 6(Rps6ka6)                                        | -2.6951  |
| AK012203 | translocase of inner mitochondrial membrane 21(Timm21)                                    | -1.65242 |
| AK012207 | RIKEN cDNA 2700003L17 gene(2700003L17Rik)                                                 | -2.3819  |
| AK012215 | ADP-ribosylation factor-like 14 effector protein(Arl14ep)                                 | -2.16373 |
| AK012302 | carbonic anhydrase 10(Car10)                                                              | -1.66555 |
| AK012304 | histone PARylation factor 1(Hpf1)                                                         | -1.62226 |
| AK012400 | potassium large conductance calcium-activated channel, subfamily M, beta member 2(Kcnmb2) | -1.89221 |
| AK012420 | RIKEN cDNA 2700054B07 gene(2700054B07Rik)                                                 | -1.54348 |
| AK012530 | dual specificity phosphatase 4(Dusp4)                                                     | -1.5612  |
| AK012593 | trinucleotide repeat containing 6b(Tnrc6b)                                                | -1.70957 |

|          |                                                                  |          |
|----------|------------------------------------------------------------------|----------|
| AK012619 | small ubiquitin-like modifier 2(Sumo2)                           | -1.6715  |
| AK012625 | RIKEN cDNA 2810001A02 gene(2810001A02Rik)                        | -1.74447 |
| AK012752 | RIKEN cDNA 2810017D21 gene(2810017D21Rik)                        | -1.57272 |
| AK012763 | RIKEN cDNA 2810019C22 gene(2810019C22Rik)                        | -1.60117 |
| AK012813 | lanosterol synthase(Lss)                                         | -2.00166 |
| AK012843 | SKI/DACH domain containing 1(Skida1)                             | -1.72556 |
| AK012898 | glycine/arginine rich protein 1(Grrp1)                           | -1.91779 |
| AK012913 | B cell CLL/lymphoma 11A (zinc finger protein)(Bcl11a)            | -1.88428 |
| AK012931 | membrane bound O-acyltransferase domain containing 2(Mboat2)     | -2.63504 |
| AK012934 | germ cell-less, spermatogenesis associated 1(Gmcl1)              | -2.23449 |
| AK012965 | RIKEN cDNA 2810402E24 gene(2810402E24Rik)                        | -1.69322 |
| AK012991 | No data                                                          | -2.63024 |
| AK013031 | DEAH (Asp-Glu-Ala-His) box polypeptide 36(Dhx36)                 | -2.01475 |
| AK013044 | thioredoxin domain containing 11(Txndc11)                        | -2.01835 |
| AK013050 | zinc finger protein 933(Zfp933)                                  | -2.14464 |
| AK013078 | ADP-ribosylation factor-like 5A(Arl5a)                           | -2.03217 |
| AK013095 | replication factor C (activator 1) 3(Rfc3)                       | -1.71352 |
| AK013116 | GIN5 complex subunit 1 (Psf1 homolog)(Gins1)                     | -2.67673 |
| AK013131 | pentatricopeptide repeat domain 3(Ptcd3)                         | -1.80304 |
| AK013158 | sorting nexin 6(Snx6)                                            | -1.53424 |
| AK013267 | tetratricopeptide repeat domain 39C(Ttc39c)                      | -1.77419 |
| AK013287 | N(alpha)-acetyltransferase 50, NatE catalytic subunit(Naa50)     | -2.02732 |
| AK013289 | cytochrome c oxidase assembly protein 19(Cox19)                  | -1.75107 |
| AK013318 | Myb/SANT-like DNA-binding domain containing 2(Msantd2)           | -1.92677 |
| AK013344 | RIKEN cDNA 2810454H06 gene(2810454H06Rik)                        | -1.76054 |
| AK013354 | ankyrin repeat domain 16(Ankrd16)                                | -1.66918 |
| AK013361 | ubiquitin associated and SH3 domain containing, B(Ubash3b)       | -1.61907 |
| AK013470 | RIKEN cDNA 2900002J02 gene(2900002J02Rik)                        | -2.05871 |
| AK013498 | BCL6 interacting corepressor(Bcor)                               | -1.63102 |
| AK013530 | RIKEN cDNA 2900012M01 gene(2900012M01Rik)                        | -1.63385 |
| AK013582 | membrane-associated ring finger (C3HC4) 1(March1)                | -1.70457 |
| AK013591 | ring finger protein 165(Rnf165)                                  | -1.95921 |
| AK013618 | RIKEN cDNA 2900036C06 gene(2900036C06Rik)                        | -1.86289 |
| AK013638 | solute carrier family 39 (zinc transporter), member 10(Slc39a10) | -1.55662 |
| AK013646 | transmembrane protein 219(Tmem219)                               | -1.66619 |
| AK013671 | RIKEN cDNA 2900052O17 gene(2900052O17Rik)                        | -1.51557 |
| AK013700 | RIKEN cDNA 2900055J20 gene(2900055J20Rik)                        | -1.77969 |
| AK013741 | protein phosphatase 1K (PP2C domain containing)(Ppm1k)           | -2.15905 |
| AK013778 | RIKEN cDNA 2900073N21 gene(2900073N21Rik)                        | -1.83259 |
| AK013792 | opioid binding protein/cell adhesion molecule-like(Opcml)        | -1.79684 |

|          |                                                                |          |
|----------|----------------------------------------------------------------|----------|
| AK013807 | RIKEN cDNA 2900080J11 gene(2900080J11Rik)                      | -2.30302 |
| AK013861 | zinc finger protein 619(Zfp619)                                | -1.61692 |
| AK014000 | RIKEN cDNA 3110005L21 gene(3110005L21Rik)                      | -1.57856 |
| AK014022 | SH3-domain GRB2-like (endophilin) interacting protein 1(Sgip1) | -1.82509 |
| AK014037 | LIM homeobox protein 9(Lhx9)                                   | -1.5369  |
| AK014047 | lipase, endothelial(Lipg)                                      | -1.52907 |
| AK014059 | RIKEN cDNA 3110018A10 gene(3110018A10Rik)                      | -1.6701  |
| AK014060 | sperm associated antigen 9(Spag9)                              | -1.86641 |
| AK014066 | RIKEN cDNA 3110021A11 gene(3110021A11Rik)                      | -2.24312 |
| AK014072 | ligand dependent nuclear receptor corepressor(Lcor)            | -1.95094 |
| AK014124 | RIKEN cDNA 3110035F07 gene(3110035F07Rik)                      | -2.05184 |
| AK014147 | RIKEN cDNA 3110039I08 gene(3110039I08Rik)                      | -1.50058 |
| AK014184 | transmembrane protein 59(Tmem59)                               | -1.60593 |
| AK014192 | family with sequence similarity 118, member A(Fam118a)         | -1.74481 |
| AK014200 | zinc finger CCCH type containing 13(Zc3h13)                    | -2.14868 |
| AK014262 | tocopherol (alpha) transfer protein-like(Ttpal)                | -1.54146 |
| AK014278 | RIKEN cDNA 3200001D21 gene(3200001D21Rik)                      | -1.83257 |
| AK014465 | RIKEN cDNA 4122401K19 gene(4122401K19Rik)                      | -1.59704 |
| AK014466 | kelch-like 28(Klhl28)                                          | -1.93201 |
| AK014513 | RIKEN cDNA 4631405K08 gene(4631405K08Rik)                      | -1.71537 |
| AK014514 | inter-alpha (globulin) inhibitor H5(Itih5)                     | -1.76242 |
| AK014549 | RIKEN cDNA 4632404H12 gene(4632404H12Rik)                      | -2.29498 |
| AK014557 | tubulin tyrosine ligase-like family, member 4(Ttll4)           | -1.90314 |
| AK014621 | coiled-coil domain containing 93(Ccdc93)                       | -1.54798 |
| AK014650 | RIKEN cDNA 4832441B07 gene(4832441B07Rik)                      | -2.05734 |
| AK014664 | zinc finger protein 626(Zfp626)                                | -1.71106 |
| AK014685 | RIKEN cDNA 4833412E19 gene(4833412E19Rik)                      | -1.50616 |
| AK014692 | RIKEN cDNA 4833413N01 gene(4833413N01Rik)                      | -1.53312 |
| AK014745 | RIKEN cDNA 4833421G17 gene(4833421G17Rik)                      | -4.28261 |
| AK014794 | MSS51 mitochondrial translational activator(Mss51)             | -2.39661 |
| AK014847 | RIKEN cDNA 4921509A06 gene(4921509A06Rik)                      | -1.81571 |
| AK014883 | RIKEN cDNA 4921513I08 gene(4921513I08Rik)                      | -2.05857 |
| AK014894 | cullin 5(Cul5)                                                 | -2.34366 |
| AK014961 | RIKEN cDNA 4921524L21 gene(4921524L21Rik)                      | -1.66422 |
| AK015027 | tetratricopeptide repeat domain 23-like(Ttc23l)                | -1.74187 |
| AK015076 | RIKEN cDNA 4930404F17 gene(4930404F17Rik)                      | -1.52718 |
| AK015080 | testis expressed 36(Tex36)                                     | -1.99061 |
| AK015101 | RIKEN cDNA 4930405N21 gene(4930405N21Rik)                      | -1.86612 |
| AK015117 | claudin 34C4(Cldn34c4)                                         | -1.62557 |
| AK015185 | RIKEN cDNA 4930423B08 gene(4930423B08Rik)                      | -1.7438  |

|          |                                                                    |          |
|----------|--------------------------------------------------------------------|----------|
| AK015225 | protein prenyltransferase alpha subunit repeat containing 1(Ptar1) | -1.60435 |
| AK015234 | RIKEN cDNA 4930429E23 gene(4930429E23Rik)                          | -2.23737 |
| AK015241 | catenin (cadherin associated protein), alpha 3(Ctnna3)             | -1.57093 |
| AK015268 | RIKEN cDNA 4930431H11 gene(4930431H11Rik)                          | -2.20986 |
| AK015280 | RIKEN cDNA 4930431P19 gene(4930431P19Rik)                          | -1.72231 |
| AK015322 | RIKEN cDNA 4933409F18 gene(4933409F18Rik)                          | -1.97161 |
| AK015336 | RIKEN cDNA 4930438E09 gene(4930438E09Rik)                          | -1.7391  |
| AK015356 | RIKEN cDNA 4930442B02 gene(4930442B02Rik)                          | -1.78851 |
| AK015417 | RIKEN cDNA 4930448F12 gene(4930448F12Rik)                          | -1.61386 |
| AK015440 | patched domain containing 3(Ptchd3)                                | -1.53839 |
| AK015451 | RIKEN cDNA 4930453H23 gene(4930453H23Rik)                          | -2.21271 |
| AK015484 | RIKEN cDNA 4930458D05 gene(4930458D05Rik)                          | -1.56575 |
| AK015499 | kinesin family member 4, pseudogene(Kif4-ps)                       | -1.57144 |
| AK015536 | queuine tRNA-ribosyltransferase domain containing 1(Qtrtd1)        | -1.98557 |
| AK015549 | RIKEN cDNA 4930471E19 gene(4930471E19Rik)                          | -1.69334 |
| AK015561 | neurolysin (metallopeptidase M3 family)(Nln)                       | -1.61091 |
| AK015565 | No data                                                            | -1.58205 |
| AK015570 | RIKEN cDNA 4930474A20 gene(4930474A20Rik)                          | -1.65811 |
| AK015579 | RIKEN cDNA 4930477E14 gene(4930477E14Rik)                          | -1.63594 |
| AK015581 | RIKEN cDNA 4930477N07 gene(4930477N07Rik)                          | -4.02052 |
| AK015599 | RIKEN cDNA 4930480G23 gene(4930480G23Rik)                          | -1.58077 |
| AK015617 | RIKEN cDNA 4930503B20 gene(4930503B20Rik)                          | -2.03068 |
| AK015666 | transmembrane BAX inhibitor motif containing 7(Tmbim7)             | -1.70639 |
| AK015700 | TBC1 domain family, member 30(Tbc1d30)                             | -1.75512 |
| AK015704 | RIKEN cDNA 4930505K13 gene(4930505K13Rik)                          | -1.85676 |
| AK015711 | RIKEN cDNA 4930505O20 gene(4930505O20Rik)                          | -2.08559 |
| AK015713 | exportin 7(Xpo7)                                                   | -2.19986 |
| AK015723 | RIKEN cDNA 4930507A01 gene(4930507A01Rik)                          | -3.41171 |
| AK015727 | RIKEN cDNA 4930507D10 gene(4930507D10Rik)                          | -1.72432 |
| AK015731 | RIKEN cDNA 4930509B17 gene(4930509B17Rik)                          | -2.08349 |
| AK015753 | WD repeat domain 64(Wdr64)                                         | -1.52122 |
| AK015798 | RIKEN cDNA 4930515L03 gene(4930515L03Rik)                          | -2.57257 |
| AK015809 | RIKEN cDNA 4930517E11 gene(4930517E11Rik)                          | -2.10965 |
| AK015822 | RIKEN cDNA 4930518C09 gene(4930518C09Rik)                          | -2.25312 |
| AK015838 | RIKEN cDNA 4930519D14 gene(4930519D14Rik)                          | -1.8605  |
| AK015840 | RIKEN cDNA 4930519E07 gene(4930519E07Rik)                          | -1.57271 |
| AK015858 | PIH1 domain containing 3(Pih1d3)                                   | -1.58499 |
| AK015863 | WBP2 N-terminal like(Wbp2nl)                                       | -1.61731 |
| AK015908 | RIKEN cDNA 4930526M16 gene(4930526M16Rik)                          | -1.54875 |
| AK015913 | Slx-like 1(Slx1)                                                   | -1.59871 |

|          |                                                                                              |          |
|----------|----------------------------------------------------------------------------------------------|----------|
| AK015980 | coiled-coil domain containing 33(Ccdc33)                                                     | -1.81132 |
| AK015981 | RIKEN cDNA 4930535F04 gene(4930535F04Rik)                                                    | -1.85238 |
| AK015986 | PDZ domain containing 2(Pdzd2)                                                               | -1.58131 |
| AK016029 | RIKEN cDNA 4930543I03 gene(4930543I03Rik)                                                    | -2.66948 |
| AK016051 | high-mobility group box 4, opposite strand(Hmgb4os)                                          | -1.62782 |
| AK016069 | RIKEN cDNA 4930548G14 gene(4930548G14Rik)                                                    | -1.83125 |
| AK016071 | RIKEN cDNA 4930548K13 gene(4930548K13Rik)                                                    | -2.14628 |
| AK016135 | ethanolamine kinase 1(Etnk1)                                                                 | -2.09936 |
| AK016140 | RIKEN cDNA 4930556A20 gene(4930556A20Rik)                                                    | -1.85693 |
| AK016182 | RIKEN cDNA 4930559C10 gene(4930559C10Rik)                                                    | -2.21217 |
| AK016188 | alkB homolog 8, tRNA methyltransferase(Alkbh8)                                               | -1.92058 |
| AK016191 | RIKEN cDNA 4930562F07 gene(4930562F07Rik)                                                    | -2.82898 |
| AK016193 | RIKEN cDNA 4930562M23 gene(4930562M23Rik)                                                    | -1.60439 |
| AK016201 | dynein assembly factor with WDR repeat domains 1(Daw1)                                       | -2.14518 |
| AK016220 | glutamate receptor interacting protein 1, opposite strand 2(Grip1os2)                        | -1.81554 |
| AK016239 | RIKEN cDNA 4930566N20 gene(4930566N20Rik)                                                    | -1.61478 |
| AK016291 | RIKEN cDNA 4930573H18 gene(4930573H18Rik)                                                    | -2.39121 |
| AK016314 | RIKEN cDNA 4930579D07 gene(4930579D07Rik)                                                    | -2.40002 |
| AK016331 | RIKEN cDNA 4930579O11 gene(4930579O11Rik)                                                    | -1.74096 |
| AK016332 | RIKEN cDNA 4930567H12 gene(4930567H12Rik)                                                    | -1.58228 |
| AK016402 | RIKEN cDNA 4930597A21 gene(4930597A21Rik)                                                    | -1.51872 |
| AK016408 | RIKEN cDNA 4930597O21 gene(4930597O21Rik)                                                    | -1.84809 |
| AK016429 | RIKEN cDNA 4931403M11 gene(4931403M11Rik)                                                    | -1.60625 |
| AK016453 | RIKEN cDNA 4931413I07 gene(4931413I07Rik)                                                    | -1.50724 |
| AK016458 | RIKEN cDNA 4931415C17 gene(4931415C17Rik)                                                    | -1.59382 |
| AK016504 | N(alpha)-acetyltransferase 40, NatD catalytic subunit(Naa40)                                 | -1.81027 |
| AK016513 | RIKEN cDNA 4931440P22 gene(4931440P22Rik)                                                    | -1.92975 |
| AK016541 | RIKEN cDNA 4932432N04 gene(4932432N04Rik)                                                    | -2.06054 |
| AK016572 | phospholipid phosphatase 6(Plpp6)                                                            | -1.89505 |
| AK016597 | transmembrane protein 30C(Tmem30c)                                                           | -2.16527 |
| AK016603 | transketolase-like 2(Tktl2)                                                                  | -1.62849 |
| AK016652 | RIKEN cDNA 4933404K08 gene(4933404K08Rik)                                                    | -2.26372 |
| AK016673 | RIKEN cDNA 4933405L10 gene(4933405L10Rik)                                                    | -2.18262 |
| AK016678 | amyotrophic lateral sclerosis 2 (juvenile) chromosome region, candidate 12 (human)(Als2cr12) | -1.55349 |
| AK016697 | RIKEN cDNA 4933406J10 gene(4933406J10Rik)                                                    | -1.86674 |
| AK016703 | RIKEN cDNA 4933406L23 gene(4933406L23Rik)                                                    | -1.55766 |
| AK016727 | zinc finger protein 597(Zfp597)                                                              | -1.87121 |
| AK016740 | RIKEN cDNA 4933408K01 gene(4933408K01Rik)                                                    | -1.93846 |
| AK016750 | RIKEN cDNA 4933409D19 gene(4933409D19Rik)                                                    | -1.55815 |
| AK016789 | RIKEN cDNA 4933412E24 gene(4933412E24Rik)                                                    | -1.86173 |

|          |                                                                                                |          |
|----------|------------------------------------------------------------------------------------------------|----------|
| AK016843 | RIKEN cDNA 4933417E11 gene(4933417E11Rik)                                                      | -2.23805 |
| AK016861 | Nipped-B homolog (Drosophila)(Nipbl)                                                           | -1.57983 |
| AK016875 | RIKEN cDNA 4933423K11 gene(4933423K11Rik)                                                      | -1.615   |
| AK016878 | RIKEN cDNA 4933423N12 gene(4933423N12Rik)                                                      | -2.73493 |
| AK016915 | MEIR1 treanscription regulator(Mier1)                                                          | -3.08248 |
| AK016916 | kinesin family member 24(Kif24)                                                                | -1.78551 |
| AK016937 | centrosomal protein 170(Cep170)                                                                | -2.26566 |
| AK016992 | RIKEN cDNA 4933430H06 gene(4933430H06Rik)                                                      | -2.42507 |
| AK017008 | radial spoke head homolog 14 (Chlamydomonas)(Rsph14)                                           | -1.7306  |
| AK017101 | RIKEN cDNA 4933437I04 gene(4933437I04Rik)                                                      | -1.8177  |
| AK017223 | sphingomyelin synthase 2(Sgms2)                                                                | -2.52874 |
| AK017263 | RIKEN cDNA 5430402P08 gene(5430402P08Rik)                                                      | -1.75401 |
| AK017285 | chloride channel, voltage-sensitive 5(Clcn5)                                                   | -1.91662 |
| AK017297 | ectopic P-granules autophagy protein 5 homolog (C. elegans)(Epg5)                              | -2.51583 |
| AK017307 | RIKEN cDNA 5430414B19 gene(5430414B19Rik)                                                      | -2.02081 |
| AK017335 | RIKEN cDNA 5430425E15 gene(5430425E15Rik)                                                      | -1.82377 |
| AK017337 | solute carrier family 6 (neurotransmitter transporter), member 19, opposite strand(Slc6a19os)  | -1.69675 |
| AK017430 | RIKEN cDNA 5530401A14 gene(5530401A14Rik)                                                      | -2.041   |
| AK017476 | paraneoplastic antigen MA1(Pnma1)                                                              | -1.69908 |
| AK017493 | cyclin Y(Ccny)                                                                                 | -1.59221 |
| AK017553 | collagen, type XIV, alpha 1(Col14a1)                                                           | -1.77632 |
| AK017566 | No data                                                                                        | -1.86446 |
| AK017594 | leucine rich repeat and fibronectin type III domain containing 2(Lrfn2)                        | -2.29289 |
| AK017624 | RIKEN cDNA 5730437C12 gene(5730437C12Rik)                                                      | -2.16511 |
| AK017658 | splicing factor proline/glutamine rich (polypyrimidine tract binding protein associated)(Sfpq) | -1.6056  |
| AK017713 | p21 protein (Cdc42/Rac)-activated kinase 4(Pak4)                                               | -1.55057 |
| AK017737 | zinc finger, DHHC domain containing 24(Zdhhc24)                                                | -1.59477 |
| AK017836 | sorting nexin family member 27(Snx27)                                                          | -1.53131 |
| AK017858 | enhancer of polycomb homolog 1 (Drosophila)(Epc1)                                              | -1.51637 |
| AK017868 | shugoshin-like 2a (S. pombe)(Sgol2a)                                                           | -1.86886 |
| AK017897 | syntaxin 11(Stx11)                                                                             | -1.71075 |
| AK017954 | RIKEN cDNA 5830428M24 gene(5830428M24Rik)                                                      | -2.8244  |
| AK017960 | RIKEN cDNA 5830431M20 gene(5830431M20Rik)                                                      | -1.63633 |
| AK017983 | RIKEN cDNA 5830442K09 gene(5830442K09Rik)                                                      | -1.52956 |
| AK017986 | No data                                                                                        | -1.66172 |
| AK018037 | antagonist of mitotic exit network 1(Amn1)                                                     | -1.8162  |
| AK018052 | tocopherol (alpha) transfer protein-like(Ttpal)                                                | -2.9659  |

|          |                                                                                             |     |          |
|----------|---------------------------------------------------------------------------------------------|-----|----------|
| AK018093 | phosphatidylinositol-3,4,5-trisphosphate-dependent exchange factor 2(Prex2)                 | Rac | -1.59058 |
| AK018095 | RIKEN cDNA 6230424C14 gene(6230424C14Rik)                                                   |     | -1.55749 |
| AK018110 | transcription elongation factor A (SII) N-terminal and central domain containing 2(Tceanc2) |     | -1.68776 |
| AK018173 | tripartite motif-containing 62(Trim62)                                                      |     | -1.5641  |
| AK018202 | nuclear paraspeckle assembly transcript 1 (non-protein coding)(Neat1)                       |     | -1.82842 |
| AK018282 | family with sequence similarity 81, member A(Fam81a)                                        |     | -1.70042 |
| AK018289 | RIKEN cDNA 6430605C03 gene(6430605C03Rik)                                                   |     | -1.59889 |
| AK018292 | RIKEN cDNA 6430628N08 gene(6430628N08Rik)                                                   |     | -2.66179 |
| AK018295 | janus kinase and microtubule interacting protein 2(Jakmip2)                                 |     | -1.5911  |
| AK018302 | RIKEN cDNA 6430710C18 gene(6430710C18Rik)                                                   |     | -1.58853 |
| AK018342 | RTF1, Paf1/RNA polymerase II complex component(Rtf1)                                        |     | -1.65051 |
| AK018347 | interleukin 10 receptor, beta(Il10rb)                                                       |     | -1.81015 |
| AK018351 | small VCP/p97-interacting protein(Svip)                                                     |     | -2.47395 |
| AK018388 | Fras1 related extracellular matrix protein 2(Frem2)                                         |     | -2.01619 |
| AK018392 | acyl-Coenzyme A binding domain containing 3(Acbd3)                                          |     | -2.30375 |
| AK018401 | alpha-kinase 1(Alpk1)                                                                       |     | -1.59469 |
| AK018414 | protein phosphatase 4, regulatory subunit 4(Ppp4r4)                                         |     | -2.45088 |
| AK018439 | RIKEN cDNA 8430425A16 gene(8430425A16Rik)                                                   |     | -2.04994 |
| AK018466 | RNA binding motif, single stranded interacting protein(Rbms3)                               |     | -1.72779 |
| AK018468 | RIKEN cDNA 8430437B07 gene(8430437B07Rik)                                                   |     | -1.50384 |
| AK018489 | RIKEN cDNA 9030407C09 gene(9030407C09Rik)                                                   |     | -1.57017 |
| AK018501 | RIKEN cDNA 9030411K21 gene(9030411K21Rik)                                                   |     | -1.579   |
| AK018504 | Ras association (RalGDS/AF-6) domain family member 2(Rassf2)                                |     | -1.6261  |
| AK018545 | family with sequence similarity 110, member C(Fam110c)                                      |     | -2.25401 |
| AK018556 | RIKEN cDNA 9030613N10 gene(9030613N10Rik)                                                   |     | -1.63772 |
| AK018561 | extracellular matrix protein 2, female organ and adipocyte specific(Ecm2)                   |     | -1.92009 |
| AK018625 | RIKEN cDNA 9130015G15 gene(9130015G15Rik)                                                   |     | -2.07402 |
| AK018633 | clathrin, heavy polypeptide (Hc)(Cltc)                                                      |     | -1.60664 |
| AK018699 | RIKEN cDNA E130018N17 gene(E130018N17Rik)                                                   |     | -1.71889 |
| AK018750 | RIKEN cDNA 0610033P13 gene(0610033P13Rik)                                                   |     | -1.69981 |
| AK018751 | RIKEN cDNA 0610037L18 gene(0610037L18Rik)                                                   |     | -1.738   |
| AK018867 | RIKEN cDNA 1700061G19 gene(1700061G19Rik)                                                   |     | -1.72751 |
| AK018873 | family with sequence similarity 24, member A(Fam24a)                                        |     | -2.6025  |
| AK018878 | RIKEN cDNA 1700065F09 gene(1700065F09Rik)                                                   |     | -1.99054 |
| AK018913 | RIKEN cDNA 1700087M22 gene(1700087M22Rik)                                                   |     | -2.10943 |
| AK018920 | src family associated phosphoprotein 1(Skap1)                                               |     | -1.50925 |
| AK018948 | RIKEN cDNA 1700112J05 gene(1700112J05Rik)                                                   |     | -1.9599  |



|          |                                                                                               |          |
|----------|-----------------------------------------------------------------------------------------------|----------|
| AK018953 | glutathione S-transferase omega 2(Gsto2)                                                      | -2.5948  |
| AK019053 | predicted gene 15247(Gm15247)                                                                 | -2.86931 |
| AK019107 | RIKEN cDNA 2410006F04 gene(2410006F04Rik)                                                     | -1.89427 |
| AK019110 | pluripotency associated transcript 27(Platr27)                                                | -1.65568 |
| AK019193 | RIKEN cDNA 2610524J22 gene(2610524J22Rik)                                                     | -2.46819 |
| AK019302 | RIKEN cDNA 2900002M20 gene(2900002M20Rik)                                                     | -1.58716 |
| AK019347 | adhesion G protein-coupled receptor A1(Adgra1)                                                | -1.69579 |
| AK019369 | FERM and PDZ domain containing 1, opposite strand(Frmpd1os)                                   | -2.16532 |
| AK019405 | armadillo repeat containing, X-linked 1(Armcx1)                                               | -1.81212 |
| AK019424 | synaptotagmin VI(Syt6)                                                                        | -2.09159 |
| AK019501 | RIKEN cDNA 4632418H02 gene(4632418H02Rik)                                                     | -1.94931 |
| AK019510 | RIKEN cDNA 4831407H17 gene(4831407H17Rik)                                                     | -1.79402 |
| AK019513 | KDEL (Lys-Asp-Glu-Leu) containing 2(Kdelc2)                                                   | -2.51698 |
| AK019541 | zinc finger protein 286, intronic transcript(Zfp286it)                                        | -1.90918 |
| AK019568 | NLR family, pyrin domain containing 4E(Nlrp4e)                                                | -2.5282  |
| AK019605 | No data                                                                                       | -1.53384 |
| AK019650 | RIKEN cDNA 4930480K15 gene(4930480K15Rik)                                                     | -1.51743 |
| AK019665 | cytochrome c oxidase subunit VIIb2(Cox7b2)                                                    | -1.86475 |
| AK019691 | RIKEN cDNA 4930522O17 gene(4930522O17Rik)                                                     | -2.91786 |
| AK019695 | protein phosphatase 1, regulatory subunit 3F, opposite strand(Ppp1r3fos)                      | -2.16317 |
| AK019751 | RIKEN cDNA 4930548J01 gene(4930548J01Rik)                                                     | -1.88855 |
| AK019766 | sperm tail PG rich repeat containing 1(Stpg1)                                                 | -1.86641 |
| AK019769 | RIKEN cDNA 4930556G22 gene(4930556G22Rik)                                                     | -2.19865 |
| AK019801 | RIKEN cDNA 4933406F09 gene(4933406F09Rik)                                                     | -1.57313 |
| AK019848 | No data                                                                                       | -2.03637 |
| AK019917 | RIKEN cDNA 5330428N10 gene(5330428N10Rik)                                                     | -1.81813 |
| AK019945 | RIKEN cDNA 5430409L15 gene(5430409L15Rik)                                                     | -2.18271 |
| AK019953 | RIKEN cDNA 5730402E23 gene(5730402E23Rik)                                                     | -2.38958 |
| AK019966 | sosondowah ankyrin repeat domain family member B(Sowahb)                                      | -1.53896 |
| AK019967 | lysophosphatidic acid receptor 4(Lpar4)                                                       | -1.787   |
| AK019998 | polycomb group ring finger 5(Pcgf5)                                                           | -2.40165 |
| AK020016 | RIKEN cDNA 5830420C07 gene(5830420C07Rik)                                                     | -2.03599 |
| AK020045 | RIKEN cDNA 6030400A10 gene(6030400A10Rik)                                                     | -2.14564 |
| AK020073 | RIKEN cDNA 6030458A19 gene(6030458A19Rik)                                                     | -1.78455 |
| AK020074 | RIKEN cDNA 6030458C11 gene(6030458C11Rik)                                                     | -3.40513 |
| AK020135 | F-box protein 42(Fbxo42)                                                                      | -2.09573 |
| AK020178 | RIKEN cDNA 7330404K18 gene(7330404K18Rik)                                                     | -1.51065 |
| AK020179 | adaptor protein, phosphotyrosine interaction, PH domain and leucine zipper containing 1(App1) | -2.02723 |
| AK020194 | RIKEN cDNA 8030423J24 gene(8030423J24Rik)                                                     | -1.62554 |

|          |                                                            |          |
|----------|------------------------------------------------------------|----------|
| AK020202 | RIKEN cDNA 8030448I15 gene(8030448I15Rik)                  | -2.12325 |
| AK020268 | RIKEN cDNA 9130024F11 gene(9130024F11Rik)                  | -1.96547 |
| AK020283 | RIKEN cDNA 9130219B18 gene(9130219B18Rik)                  | -1.6972  |
| AK020345 | RIKEN cDNA 9230113P08 gene(9230113P08Rik)                  | -1.55099 |
| AK020348 | acyl-Coenzyme A binding domain containing 7(Acbd7)         | -1.88396 |
| AK020390 | Scm-like with four mbt domains 1(Sfmbt1)                   | -1.63321 |
| AK020397 | interleukin-1 receptor-associated kinase 4(Irak4)          | -1.81854 |
| AK020399 | RIKEN cDNA 9430002A10 gene(9430002A10Rik)                  | -1.65849 |
| AK020401 | RIKEN cDNA 2310011J03 gene(2310011J03Rik)                  | -1.50319 |
| AK020412 | RIKEN cDNA 9430012M22 gene(9430012M22Rik)                  | -1.52197 |
| AK020417 | RIKEN cDNA 9430014K20 gene(9430014K20Rik)                  | -1.78004 |
| AK020428 | RIKEN cDNA 9430020M11 gene(9430020M11Rik)                  | -1.50972 |
| AK020434 | RIKEN cDNA 9430024C03 gene(9430024C03Rik)                  | -2.02507 |
| AK020451 | RIKEN cDNA 9430031J08 gene(9430031J08Rik)                  | -1.67952 |
| AK020458 | RIKEN cDNA 9430037O13 gene(9430037O13Rik)                  | -2.30677 |
| AK020487 | POU domain, class 3, transcription factor 2(Pou3f2)        | -1.66696 |
| AK020523 | zinc finger protein 719(Zfp719)                            | -1.65257 |
| AK020525 | RIKEN cDNA 9430095M17 gene(9430095M17Rik)                  | -1.71269 |
| AK020530 | RIKEN cDNA 9430099M06 gene(9430099M06Rik)                  | -1.54557 |
| AK020535 | serine protease inhibitor, Kazal type-like(Spink1)         | -1.95875 |
| AK020555 | RIKEN cDNA 9530013L04 gene(9530013L04Rik)                  | -2.38443 |
| AK020563 | RAB35, member RAS oncogene family(Rab35)                   | -1.57096 |
| AK020565 | RIKEN cDNA 9530020I12 gene(9530020I12Rik)                  | -1.65332 |
| AK020576 | RIKEN cDNA 9530026P05 gene(9530026P05Rik)                  | -1.68006 |
| AK020601 | RIKEN cDNA 9530049O05 gene(9530049O05Rik)                  | -1.6017  |
| AK020630 | RIKEN cDNA 9530067L11 gene(9530067L11Rik)                  | -1.53514 |
| AK020644 | RIKEN cDNA 9530075M24 gene(9530075M24Rik)                  | -1.93445 |
| AK020646 | lysine (K)-specific methyltransferase 2E(Kmt2e)            | -2.00854 |
| AK020648 | RIKEN cDNA 9530077C14 gene(9530077C14Rik)                  | -1.52125 |
| AK020664 | RIKEN cDNA 9530097N15 gene(9530097N15Rik)                  | -1.98228 |
| AK020688 | DnaJ heat shock protein family (Hsp40) member C21(Dnajc21) | -1.88072 |
| AK020723 | pro-melanin-concentrating hormone(Pmch)                    | -1.63085 |
| AK020752 | transmembrane protein 86B(Tmem86b)                         | -1.96209 |
| AK020759 | RIKEN cDNA A430103D13 gene(A430103D13Rik)                  | -1.7963  |
| AK020767 | RIKEN cDNA A430105J06 gene(A430105J06Rik)                  | -1.56458 |
| AK020769 | RIKEN cDNA A430105P17 gene(A430105P17Rik)                  | -2.5954  |
| AK020835 | RIKEN cDNA A930009E05 gene(A930009E05Rik)                  | -2.39342 |
| AK020854 | RIKEN cDNA A930014D07 gene(A930014D07Rik)                  | -1.61489 |
| AK020855 | RIKEN cDNA A930014D08 gene(A930014D08Rik)                  | -1.8892  |
| AK020914 | RIKEN cDNA A930031H19 gene(A930031H19Rik)                  | -1.77334 |
| AK020917 | nucleoredoxin-like 1(Nxn1)                                 | -1.5033  |

|          |                                                                  |          |
|----------|------------------------------------------------------------------|----------|
| AK020921 | RIKEN cDNA A930033C23 gene(A930033C23Rik)                        | -1.67485 |
| AK021023 | nucleolar protein 3 (apoptosis repressor with CARD domain)(Nol3) | -1.55356 |
| AK021040 | cadherin 10(Cdh10)                                               | -1.57568 |
| AK021055 | RIKEN cDNA C030007I01 gene(C030007I01Rik)                        | -1.75914 |
| AK021071 | RIKEN cDNA C030013C02 gene(C030013C02Rik)                        | -1.8931  |
| AK021099 | transmembrane protein 116(Tmem116)                               | -1.58582 |
| AK021121 | RIKEN cDNA C030034I22 gene(C030034I22Rik)                        | -1.83253 |
| AK021123 | Jrk-like(Jrkl)                                                   | -2.64677 |
| AK021219 | RIKEN cDNA C330022C24 gene(C330022C24Rik)                        | -2.04663 |
| AK021240 | RIKEN cDNA C430014O12 gene(C430014O12Rik)                        | -2.11688 |
| AK021346 | RIKEN cDNA D730047N16 gene(D730047N16Rik)                        | -2.3994  |
| AK021347 | RIKEN cDNA D730047P14 gene(D730047P14Rik)                        | -2.03914 |
| AK021375 | No data                                                          | -2.01616 |
| AY007202 | mucin 4(Muc4)                                                    | -2.2264  |
| AY007815 | cell migration inducing protein, hyaluronan binding(Cemip)       | -1.88136 |
| AY017368 | kin of IRRE like (Drosophila)(Kirrel)                            | -1.88428 |
| AY026045 | RIKEN cDNA 1700016D06 gene(1700016D06Rik)                        | -2.57783 |
| AY026324 | No data                                                          | -1.52533 |
| AY042192 | MAS-related GPR, member A2B(Mrgpra2b)                            | -1.56106 |
| AY044153 | histamine receptor H3(Hrh3)                                      | -1.82983 |
| AY046504 | translocated promoter region, nuclear basket protein(Tpr)        | -1.90885 |
| BB258473 | No data                                                          | -1.5814  |
| BC002131 | ADP-ribosylation factor-like 2 binding protein(Arl2bp)           | -1.57286 |
| BC002221 | CUGBP, Elav-like family member 1(Celf1)                          | -1.61621 |
| BC002223 | protein phosphatase 6, catalytic subunit(Ppp6c)                  | -1.5357  |
| BC002300 | DEAD (Asp-Glu-Ala-Asp) box polypeptide 19b(Ddx19b)               | -2.04026 |
| BC003258 | zinc finger protein 672(Zfp672)                                  | -1.69674 |
| BC003301 | KAT8 regulatory NSL complex subunit 2(Kansl2)                    | -2.07244 |
| BC003335 | replication factor C (activator 1) 4(Rfc4)                       | -1.87143 |
| BC003350 | G protein pathway suppressor 1(Gps1)                             | -1.88452 |
| BC003446 | glomulin, FKBP associated protein(Glmn)                          | -2.17385 |
| BC003885 | ribosomal L24 domain containing 1(Rsl24d1)                       | -1.61566 |
| BC003938 | SNF8, ESCRT-II complex subunit, homolog (S. cerevisiae)(Snf8)    | -2.0618  |
| BC004086 | N(alpha)-acetyltransferase 50, NatE catalytic subunit(Naa50)     | -3.0958  |
| BC004614 | mitochondrial ribosomal protein L30(Mrpl30)                      | -1.99744 |
| BC004632 | UBX domain protein 2A(Ubxn2a)                                    | -2.00397 |
| BC004650 | serine/threonine kinase 24(Stk24)                                | -1.70684 |
| BC004710 | target of myb1-like 1 (chicken)(Tom1l1)                          | -1.62237 |
| BC004785 | nucleolar protein 11(Nol11)                                      | -1.83082 |
| BC004840 | transmembrane channel-like gene family 6(Tmc6)                   | -2.26509 |

|          |                                                                      |          |
|----------|----------------------------------------------------------------------|----------|
| BC005536 | lectin, galactoside binding-like(Lgalsl)                             | -2.47492 |
| BC005613 | LIM domain containing preferred translocation partner in lipoma(Lpp) | -1.54705 |
| BC005651 | mucolipin 1(Mcoln1)                                                  | -1.9209  |
| BC005672 | sestrin 2(Sesn2)                                                     | -1.77947 |
| BC005711 | alanyl-tRNA synthetase domain containing 1(Aarsd1)                   | -1.89506 |
| BC005759 | SEC14-like lipid binding 2(Sec14l2)                                  | -2.14165 |
| BC006028 | No data                                                              | -1.51532 |
| BC006071 | No data                                                              | -2.19662 |
| BC006655 | ring finger and CCCH-type zinc finger domains 2(Rc3h2)               | -1.6681  |
| BC006890 | keratinocyte differentiation factor 1(Kdf1)                          | -1.51344 |
| BC006892 | AHNAK nucleoprotein (desmoyokin)(Ahnak)                              | -1.64489 |
| BC006901 | cytidine and dCMP deaminase domain containing 1(Cdad1)               | -1.54957 |
| BC006931 | expressed sequence AI597479(AI597479)                                | -2.15426 |
| BC007160 | transmembrane protein 168(Tmem168)                                   | -1.94775 |
| BC007162 | PDGFA associated protein 1(Pdap1)                                    | -1.90675 |
| BC007171 | eukaryotic translation initiation factor 4B(Eif4b)                   | -1.6731  |
| BC007193 | RIKEN cDNA C130026I21 gene(C130026I21Rik)                            | -1.88231 |
| BC008524 | high density lipoprotein (HDL) binding protein(Hdlbp)                | -2.0139  |
| BC009022 | isocitrate dehydrogenase 3 (NAD+) beta(Idh3b)                        | -1.79736 |
| BC009166 | mitochondrial ribosomal protein L36(Mrpl36)                          | -1.53628 |
| BC010520 | arginyl aminopeptidase (aminopeptidase B)(Rnpep)                     | -1.96186 |
| BC010601 | poly-U binding splicing factor 60(Puf60)                             | -1.98615 |
| BC010790 | ATPase, H+ transporting, lysosomal V0 subunit E2(Atp6v0e2)           | -1.57582 |
| BC010799 | glycine-N-acyltransferase(Glyat)                                     | -1.91469 |
| BC010827 | guanosine monophosphate reductase(Gmpr)                              | -1.63675 |
| BC011208 | transmembrane protein 98(Tmem98)                                     | -1.55715 |
| BC011220 | ER lipid raft associated 1(Erlin1)                                   | -2.08913 |
| BC011287 | mindbomb E3 ubiquitin protein ligase 1(Mib1)                         | -1.84769 |
| BC011293 | solute carrier family 25, member 33(Slc25a33)                        | -2.42524 |
| BC011300 | Fgfr1op N-terminal like(Fopnl)                                       | -1.83245 |
| BC011340 | CUB domain containing protein 1(Cdcp1)                               | -2.05706 |
| BC011388 | ubiquinol-cytochrome c reductase hinge protein(Uqcrh)                | -1.51872 |
| BC011457 | transmembrane and coiled-coil domains 1(Tmco1)                       | -2.44698 |
| BC012278 | zinc finger protein 825(Zfp825)                                      | -2.02377 |
| BC012416 | NADH dehydrogenase (ubiquinone) 1 alpha subcomplex, 8(Ndufa8)        | -1.88458 |
| BC012522 | electron transferring flavoprotein, dehydrogenase(Etfdh)             | -1.66009 |
| BC013079 | MAK16 homolog(Mak16)                                                 | -1.92258 |
| BC013499 | DEP domain containing 7(Depdc7)                                      | -1.63131 |
| BC013522 | CDGSH iron sulfur domain 1(Cisd1)                                    | -1.53212 |
| BC014699 | eva-1 homolog A (C. elegans)(Eva1a)                                  | -2.27514 |

|          |                                                                            |          |
|----------|----------------------------------------------------------------------------|----------|
| BC014719 | sorting nexin 11(Snx11)                                                    | -1.76204 |
| BC014756 | leucine rich repeat containing 8D(Lrrc8d)                                  | -1.53405 |
| BC014857 | serine/arginine-rich splicing factor 7(Srsf7)                              | -1.61914 |
| BC015283 | protein kinase, AMP-activated, gamma 2 non-catalytic subunit(Prkag2)       | -1.56944 |
| BC015305 | tafazzin(Taz)                                                              | -1.72267 |
| BC015306 | family with sequence similarity 19, member A5(Fam19a5)                     | -1.924   |
| BE569977 | No data                                                                    | -1.96045 |
| BE571871 | No data                                                                    | -2.04202 |
| BF141398 | No data                                                                    | -1.6433  |
| BF163506 | No data                                                                    | -1.57116 |
| BF182413 | No data                                                                    | -1.55897 |
| BF299809 | No data                                                                    | -2.12395 |
| D10627   | zinc finger protein 930(Zfp930)                                            | -2.45535 |
| D12724   | No data                                                                    | -1.9729  |
| D12726   | No data                                                                    | -1.88433 |
| D13200   | No data                                                                    | -1.88775 |
| D14629   | No data                                                                    | -1.73473 |
| D16598   | No data                                                                    | -2.23383 |
| D30730   | neurofibromatosis 1(Nf1)                                                   | -2.52061 |
| D84237   | ryanodine receptor 3(Ryr3)                                                 | -1.90702 |
| J03783   | interleukin 6(Il6)                                                         | -2.07028 |
| J03880   | UDP-Gal:betaGlcNAc beta 1,4- galactosyltransferase, polypeptide 1(B4galt1) | -2.25321 |
| J03953   | glutathione S-transferase, mu 3(Gstm3)                                     | -1.94997 |
| K00083   | interferon gamma(Ifng)                                                     | -1.68502 |
| K00608   | No data                                                                    | -1.80402 |
| K01347   | glial fibrillary acidic protein(Gfap)                                      | -2.01045 |
| K02162   | No data                                                                    | -1.96112 |
| L08217   | No data                                                                    | -1.65237 |
| L08652   | No data                                                                    | -1.61139 |
| L08989   | immunoglobulin heavy chain (X24 family)(Igh-VX24)                          | -2.18355 |
| L09036   | No data                                                                    | -1.84971 |
| L10905   | brain expressed X-linked 3(Bex3)                                           | -2.16438 |
| L11333   | carboxylesterase 3A(Ces3a)                                                 | -1.86145 |
| L16799   | No data                                                                    | -1.94444 |
| L16846   | B cell translocation gene 1, anti-proliferative(Btg1)                      | -1.51455 |
| L17305   | No data                                                                    | -1.84247 |
| L19552   | No data                                                                    | -1.51185 |
| L20509   | chaperonin containing Tcp1, subunit 3 (gamma)(Cct3)                        | -1.68635 |
| L20957   | No data                                                                    | -1.50234 |
| L23151   | No data                                                                    | -1.89283 |

|        |                                                 |          |
|--------|-------------------------------------------------|----------|
| L24160 | No data                                         | -1.75367 |
| L31652 | immunoglobulin (CD79A) binding protein 1(Igbp1) | -2.03189 |
| L33257 | No data                                         | -1.54101 |
| L33406 | uromodulin(Umod)                                | -1.80225 |
| L37414 | No data                                         | -2.54367 |
| L78684 | No data                                         | -1.60407 |
| M11900 | No data                                         | -2.05639 |
| M12194 | No data                                         | -1.52222 |
| M12237 | No data                                         | -1.66299 |
| M13787 | immunoglobulin heavy chain-like(LOC435333)      | -1.96583 |
| M13967 | heat shock protein 8(Hspa8)                     | -2.97702 |
| M14506 | No data                                         | -1.56939 |
| M14830 | No data                                         | -1.69295 |
| M17941 | No data                                         | -2.76184 |
| M17943 | No data                                         | -2.28395 |
| M18260 | No data                                         | -2.82648 |
| M18503 | No data                                         | -1.86161 |
| M18613 | No data                                         | -1.51193 |
| M18947 | No data                                         | -1.60903 |
| M19201 | No data                                         | -1.74289 |
| M19441 | No data                                         | -1.75974 |
| M19893 | No data                                         | -2.14723 |
| M19895 | No data                                         | -1.99486 |
| M19899 | No data                                         | -2.34138 |
| M19905 | immunoglobulin kappa variable 4-68(Igkv4-68)    | -2.26678 |
| M19906 | No data                                         | -1.63928 |
| M21523 | No data                                         | -1.6073  |
| M22604 | No data                                         | -1.69288 |
| M24264 | No data                                         | -1.635   |
| M25562 | No data                                         | -1.51838 |
| M29241 | No data                                         | -1.51105 |
| M29246 | No data                                         | -2.7538  |
| M30208 | No data                                         | -1.94617 |
| M31278 | No data                                         | -1.5527  |
| M31962 | No data                                         | -2.40661 |
| M32007 | No data                                         | -1.59367 |
| M34633 | No data                                         | -1.641   |
| M34734 | No data                                         | -2.10372 |
| M34857 | homeobox B9(Hoxb9)                              | -2.09546 |
| M36747 | No data                                         | -1.76324 |
| M36880 | No data                                         | -1.59051 |

|           |                                                              |          |
|-----------|--------------------------------------------------------------|----------|
| M37016    | No data                                                      | -1.84816 |
| M55023    | No data                                                      | -1.519   |
| M55413    | group specific component(Gc)                                 | -1.60866 |
| M57980    | No data                                                      | -2.03384 |
| M71214    | No data                                                      | -1.61521 |
| M74423    | No data                                                      | -1.75502 |
| M79303    | RAB12, member RAS oncogene family(Rab12)                     | -1.51503 |
| M79314    | RAS related protein 1b(Rap1b)                                | -2.04175 |
| M82903    | Myb-related transcription factor, partner of profilin(Mypop) | -1.85837 |
| M83063    | No data                                                      | -1.51771 |
| M84809    | transcription factor CP2(Tfcp2)                              | -3.56556 |
| M92405    | No data                                                      | -1.91476 |
| M94297    | No data                                                      | -2.27508 |
| M94307    | No data                                                      | -1.50895 |
| M97869    | No data                                                      | -1.81775 |
| M97872    | No data                                                      | -1.50393 |
| M97879    | No data                                                      | -1.95075 |
| NM_007414 | ADP-ribosylarginine hydrolase(Adprh)                         | -1.84776 |
| NM_007429 | angiotensin II receptor, type 2(Agtr2)                       | -1.60477 |
| NM_007439 | anaplastic lymphoma kinase(Alk)                              | -1.75953 |
| NM_007440 | arachidonate 12-lipoxygenase(Alox12)                         | -2.28155 |
| NM_007446 | amylase 1, salivary(Amy1)                                    | -1.78967 |
| NM_007453 | peroxiredoxin 6(Prdx6)                                       | -2.30709 |
| NM_007482 | arginase, liver(Arg1)                                        | -2.19834 |
| NM_007484 | ras homolog family member C(Rhoc)                            | -1.71391 |
| NM_007488 | aryl hydrocarbon receptor nuclear translocator 2(Arnt2)      | -1.90945 |
| NM_007493 | asialoglycoprotein receptor 2(Asgr2)                         | -1.65806 |
| NM_007548 | PR domain containing 1, with ZNF domain(Prdm1)               | -2.95056 |
| NM_007556 | bone morphogenetic protein 6(Bmp6)                           | -2.15388 |
| NM_007559 | bone morphogenetic protein 8b(Bmp8b)                         | -1.73459 |
| NM_007567 | bassoon(Bsn)                                                 | -1.64086 |
| NM_007576 | complement component 4 binding protein(C4bp)                 | -1.6797  |
| NM_007615 | catenin (cadherin associated protein), delta 1(Ctnnd1)       | -1.91404 |
| NM_007620 | carbonyl reductase 1(Cbr1)                                   | -2.35126 |
| NM_007638 | chaperonin containing Tcp1, subunit 7 (eta)(Cct7)            | -2.10442 |
| NM_007642 | CD28 antigen(Cd28)                                           | -1.52639 |
| NM_007650 | CD5 antigen(Cd5)                                             | -1.84377 |
| NM_007655 | CD79A antigen (immunoglobulin-associated alpha)(Cd79a)       | -2.16467 |
| NM_007672 | cerebellar degeneration-related 2(Cdr2)                      | -1.55623 |
| NM_007719 | chemokine (C-C motif) receptor 7(Ccr7)                       | -1.70059 |
| NM_007747 | cytochrome c oxidase subunit Va(Cox5a)                       | -2.10633 |

|           |                                                                       |          |
|-----------|-----------------------------------------------------------------------|----------|
| NM_007760 | carnitine acetyltransferase(Crat)                                     | -1.7791  |
| NM_007791 | cysteine and glycine-rich protein 1(Csrp1)                            | -1.98036 |
| NM_007807 | cytochrome b-245, beta polypeptide(Cybb)                              | -1.54709 |
| NM_007824 | cytochrome P450, family 7, subfamily a, polypeptide 1(Cyp7a1)         | -2.73914 |
| NM_007834 | Down syndrome critical region gene 3(Dscr3)                           | -2.94381 |
| NM_007846 | defensin, alpha, related sequence 12(Defa-rs12)                       | -1.9577  |
| NM_007854 | solute carrier family 29 (nucleoside transporters), member 2(Slc29a2) | -1.79839 |
| NM_007867 | distal-less homeobox 4(Dlx4)                                          | -1.55843 |
| NM_007880 | AT rich interactive domain 3A (BRIGHT-like)(Arid3a)                   | -1.69403 |
| NM_007882 | desmocollin 3(Dsc3)                                                   | -1.56229 |
| NM_007885 | solute carrier family 26 (sulfate transporter), member 2(Slc26a2)     | -1.87254 |
| NM_007892 | E2F transcription factor 5(E2f5)                                      | -1.94489 |
| NM_007928 | MAP/microtubule affinity regulating kinase 2(Mark2)                   | -1.70339 |
| NM_007967 | even-skipped homeobox 2(Evx2)                                         | -1.63142 |
| NM_007971 | enhancer of zeste 2 polycomb repressive complex 2 subunit(Ezh2)       | -3.06641 |
| NM_007996 | ferredoxin 1(Fdx1)                                                    | -2.47573 |
| NM_008018 | SH3 and PX domains 2A(Sh3pxd2a)                                       | -1.94256 |
| NM_008027 | flotillin 1(Flot1)                                                    | -1.58986 |
| NM_008028 | flotillin 2(Flot2)                                                    | -2.31499 |
| NM_008048 | insulin-like growth factor binding protein 7(Igfbp7)                  | -1.67276 |
| NM_008051 | fucosyltransferase 1(Fut1)                                            | -2.88967 |
| NM_008071 | gamma-aminobutyric acid (GABA) A receptor, subunit beta 3(Gabrb3)     | -1.60138 |
| NM_008073 | gamma-aminobutyric acid (GABA) A receptor, subunit gamma 2(Gabrg2)    | -1.50257 |
| NM_008103 | glial cells missing homolog 1 (Drosophila)(Gcm1)                      | -2.23733 |
| NM_008139 | guanine nucleotide binding protein, alpha q polypeptide(Gnaq)         | -2.0047  |
| NM_008188 | THUMP domain containing 3(Thumpd3)                                    | -1.92916 |
| NM_008191 | guanylate cyclase activator 2b (retina)(Guca2b)                       | -2.25672 |
| NM_008206 | histocompatibility 2, O region alpha locus(H2-Oa)                     | -1.6033  |
| NM_008221 | hemoglobin Y, beta-like embryonic chain(Hbb-y)                        | -1.68329 |
| NM_008234 | helicase, lymphoid specific(Hells)                                    | -1.64913 |
| NM_008267 | homeobox B13(Hoxb13)                                                  | -2.09162 |
| NM_008291 | hydroxysteroid (17-beta) dehydrogenase 3(Hsd17b3)                     | -2.83713 |
| NM_008317 | hyaluronoglucosaminidase 1(Hyal1)                                     | -1.55776 |
| NM_008358 | interleukin 15 receptor, alpha chain(Il15ra)                          | -1.62772 |
| NM_008437 | napsin A aspartic peptidase(Napsa)                                    | -1.66341 |
| NM_008451 | kinesin light chain 2(Klc2)                                           | -2.74609 |
| NM_008477 | kinectin 1(Ktn1)                                                      | -1.51609 |



|           |                                                                                                |          |
|-----------|------------------------------------------------------------------------------------------------|----------|
| NM_008515 | leucine rich repeat (in FLII) interacting protein 1(Lrrfip1)                                   | -2.69848 |
| NM_008566 | minichromosome maintenance complex component 5(Mcm5)                                           | -1.65065 |
| NM_008590 | mesoderm specific transcript(Mest)                                                             | -2.1771  |
| NM_008637 | nudix (nucleoside diphosphate linked moiety X)-type motif 1(Nudt1)                             | -1.82122 |
| NM_008654 | protein phosphatase 1, regulatory (inhibitor) subunit 15A(Ppp1r15a)                            | -1.75442 |
| NM_008715 | integrator complex subunit 6(Ints6)                                                            | -1.92748 |
| NM_008722 | nucleophosmin 1(Npm1)                                                                          | -2.66652 |
| NM_008727 | natriuretic peptide receptor 1(Npr1)                                                           | -1.83128 |
| NM_008765 | origin recognition complex, subunit 2(Orc2)                                                    | -1.82163 |
| NM_008775 | platelet-activating factor acetylhydrolase, isoform 1b, subunit 2(Pafah1b2)                    | -2.06481 |
| NM_008776 | platelet-activating factor acetylhydrolase, isoform 1b, subunit 3(Pafah1b3)                    | -2.73166 |
| NM_008779 | contactin 3(Cntn3)                                                                             | -1.53552 |
| NM_008783 | pre B cell leukemia homeobox 1(Pbx1)                                                           | -2.15763 |
| NM_008791 | Purkinje cell protein 4(Pcp4)                                                                  | -3.13071 |
| NM_008804 | phosphodiesterase 9A(Pde9a)                                                                    | -1.92631 |
| NM_008827 | placental growth factor(Pgf)                                                                   | -2.91769 |
| NM_008856 | protein kinase C, eta(Prkch)                                                                   | -1.86875 |
| NM_008866 | lysophospholipase 1(Lypla1)                                                                    | -1.97262 |
| NM_008877 | plasminogen(Plg)                                                                               | -1.5787  |
| NM_008884 | promyelocytic leukemia(Pml)                                                                    | -1.59893 |
| NM_008892 | polymerase (DNA directed), alpha 1(Pola1)                                                      | -1.71744 |
| NM_008896 | No data                                                                                        | -1.77658 |
| NM_008897 | No data                                                                                        | -1.593   |
| NM_008907 | peptidylprolyl isomerase A(Ppia)                                                               | -1.61919 |
| NM_008921 | DNA primase, p49 subunit(Prim1)                                                                | -1.50301 |
| NM_009008 | RAS-related C3 botulinum substrate 2(Rac2)                                                     | -2.24871 |
| NM_009046 | avian reticuloendotheliosis viral (v-rel) oncogene related B(Relb)                             | -1.82856 |
| NM_009053 | RFNG O-fucosylpeptide 3-beta-N-acetylglucosaminyltransferase(Rfng)                             | -1.75896 |
| NM_009119 | Sin3-associated polypeptide 18(Sap18)                                                          | -2.07386 |
| NM_009129 | secretogranin II(Scg2)                                                                         | -2.04243 |
| NM_009141 | chemokine (C-X-C motif) ligand 5(Cxcl5)                                                        | -1.70723 |
| NM_009152 | sema domain, immunoglobulin domain (Ig), short basic domain, secreted, (semaphorin) 3A(Sema3a) | -2.35495 |
| NM_009171 | serine hydroxymethyltransferase 1 (soluble)(Shmt1)                                             | -1.90848 |
| NM_009178 | ST3 beta-galactoside alpha-2,3-sialyltransferase 4(St3gal4)                                    | -1.74467 |
| NM_009193 | stem-loop binding protein(Slbp)                                                                | -1.76005 |

|           |                                                                                                        |          |
|-----------|--------------------------------------------------------------------------------------------------------|----------|
| NM_009247 | serine (or cysteine) peptidase inhibitor, clade A, member 1E(Serpina1e)                                | -1.95204 |
| NM_009265 | small proline-rich protein 1B(Sprr1b)                                                                  | -1.75991 |
| NM_009284 | signal transducer and activator of transcription 6(Stat6)                                              | -1.63051 |
| NM_009322 | T-box brain gene 1(Tbr1)                                                                               | -2.39284 |
| NM_009346 | TEA domain family member 1(Tead1)                                                                      | -1.57918 |
| NM_009363 | trefoil factor 2 (spasmolytic protein 1)(Tff2)                                                         | -1.86084 |
| NM_009364 | tissue factor pathway inhibitor 2(Tfpi2)                                                               | -2.06185 |
| NM_009368 | transforming growth factor, beta 3(Tgfb3)                                                              | -1.56323 |
| NM_009403 | tumor necrosis factor (ligand) superfamily, member 8(Tnfsf8)                                           | -1.69055 |
| NM_009410 | topoisomerase (DNA) III alpha(Top3a)                                                                   | -1.5171  |
| NM_009418 | tripeptidyl peptidase II(Tpp2)                                                                         | -1.78711 |
| NM_009429 | tumor protein, translationally-controlled 1(Tpt1)                                                      | -2.02433 |
| NM_009508 | solute carrier family 32 (GABA vesicular transporter), member 1(Slc32a1)                               | -1.71572 |
| NM_009509 | villin 1(Vil1)                                                                                         | -2.12346 |
| NM_009528 | wingless-type MMTV integration site family, member 7B(Wnt7b)                                           | -1.59722 |
| NM_009550 | zinc finger protein 2(Zfp2)                                                                            | -1.53357 |
| NM_009560 | zinc finger protein 60(Zfp60)                                                                          | -1.53434 |
| NM_009573 | zinc finger protein of the cerebellum 1(Zic1)                                                          | -3.9409  |
| NM_009621 | a disintegrin-like and metallopeptidase (reprolysin type) with thrombospondin type 1 motif, 1(Adamts1) | -1.52179 |
| NM_009627 | adrenomedullin(Adm)                                                                                    | -1.77229 |
| NM_009632 | poly (ADP-ribose) polymerase family, member 2(Parp2)                                                   | -1.90255 |
| NM_009658 | aldo-keto reductase family 1, member B3 (aldose reductase)(Akr1b3)                                     | -1.68922 |
| NM_009669 | No data                                                                                                | -1.77819 |
| NM_009676 | aldehyde oxidase 1(Aox1)                                                                               | -2.10746 |
| NM_009691 | amyloid beta (A4) precursor-like protein 2(Aplp2)                                                      | -1.58717 |
| NM_009692 | apolipoprotein A-I(Apoa1)                                                                              | -1.57575 |
| NM_009701 | aquaporin 5(Aqp5)                                                                                      | -1.81081 |
| NM_009756 | bone morphogenetic protein 10(Bmp10)                                                                   | -2.74257 |
| NM_009769 | Kruppel-like factor 5(Klf5)                                                                            | -1.51323 |
| NM_009770 | B cell translocation gene 3(Btg3)                                                                      | -2.16689 |
| NM_009821 | runt related transcription factor 1(Runx1)                                                             | -1.56132 |
| NM_009861 | cell division cycle 42(Cdc42)                                                                          | -1.78868 |
| NM_009892 | chitinase-like 3(Chil3)                                                                                | -1.50422 |
| NM_009915 | chemokine (C-C motif) receptor 2(Ccr2)                                                                 | -2.4831  |
| NM_009949 | carnitine palmitoyltransferase 2(Cpt2)                                                                 | -1.7052  |
| NM_009972 | casein beta(Csn2)                                                                                      | -2.34025 |
| NM_009973 | casein alpha s2-like B(Csn1s2b)                                                                        | -1.64834 |

|           |                                                                                    |          |
|-----------|------------------------------------------------------------------------------------|----------|
| NM_009977 | cystatin F (leukocystatin)(Cst7)                                                   | -2.31841 |
| NM_009979 | cystatin 9(Cst9)                                                                   | -1.59292 |
| NM_009991 | cytochrome P450, family 11, subfamily b, polypeptide 2(Cyp11b2)                    | -2.46474 |
| NM_009995 | cytochrome P450, family 21, subfamily a, polypeptide 1(Cyp21a1)                    | -1.54129 |
| NM_010020 | solute carrier family 6 (neurotransmitter transporter, dopamine), member 3(Slc6a3) | -1.61258 |
| NM_010021 | deleted in azoospermia-like(Dazl)                                                  | -1.91243 |
| NM_010067 | tRNA aspartic acid methyltransferase 1(Trdmt1)                                     | -2.2116  |
| NM_010112 | embryonal Fyn-associated substrate(Efs)                                            | -1.67488 |
| NM_010124 | eukaryotic translation initiation factor 4E binding protein 2(Eif4ebp2)            | -1.50046 |
| NM_010170 | coagulation factor II (thrombin) receptor-like 2(F2rl2)                            | -2.19972 |
| NM_010176 | fumarylacetoacetate hydrolase(Fah)                                                 | -2.67548 |
| NM_010206 | fibroblast growth factor receptor 1(Fgfr1)                                         | -2.15792 |
| NM_010219 | FK506 binding protein 4(Fkbp4)                                                     | -2.4986  |
| NM_010241 | thymoma viral proto-oncogene 1 interacting protein(Aktip)                          | -1.55358 |
| NM_010259 | guanylate binding protein 2b(Gbp2b)                                                | -2.88741 |
| NM_010262 | gastrulation brain homeobox 2(Gbx2)                                                | -1.73774 |
| NM_010274 | glycerol phosphate dehydrogenase 2, mitochondrial(Gpd2)                            | -2.23707 |
| NM_010293 | glycerol kinase-like 1(Gykl1)                                                      | -1.58053 |
| NM_010352 | germ cell associated 1(Gsg1)                                                       | -2.57937 |
| NM_010353 | germ cell associated 2, haspin(Gsg2)                                               | -2.05298 |
| NM_010363 | glutathione transferase zeta 1 (maleylacetoacetate isomerase)(Gstz1)               | -1.88762 |
| NM_010368 | glucuronidase, beta(Gusb)                                                          | -2.20381 |
| NM_010445 | H6 homeobox 1(Hmx1)                                                                | -2.07249 |
| NM_010486 | ELAV (embryonic lethal, abnormal vision, Drosophila)-like 2 (Hu antigen B)(Elavl2) | -1.70898 |
| NM_010497 | isocitrate dehydrogenase 1 (NADP+), soluble(ldh1)                                  | -1.6879  |
| NM_010500 | immediate early response 5(Ier5)                                                   | -2.23435 |
| NM_010504 | interferon alpha 4(Irna4)                                                          | -1.64102 |
| NM_010505 | interferon alpha 5(Irna5)                                                          | -1.73558 |
| NM_010517 | insulin-like growth factor binding protein 4(Igfbp4)                               | -1.69759 |
| NM_010569 | inversin(Invs)                                                                     | -2.05256 |
| NM_010602 | potassium inwardly rectifying channel, subfamily J, member 11(Kcnj11)              | -1.70304 |
| NM_010606 | potassium inwardly-rectifying channel, subfamily J, member 6(Kcnj6)                | -2.35201 |
| NM_010653 | killer cell lectin-like receptor subfamily C, member 2(Klrc2)                      | -1.60057 |
| NM_010710 | LIM homeobox protein 2(Lhx2)                                                       | -2.62734 |

|           |                                                                                                                            |          |
|-----------|----------------------------------------------------------------------------------------------------------------------------|----------|
| NM_010735 | lymphotoxin A(Lta)                                                                                                         | -2.47082 |
| NM_010749 | mannose-6-phosphate receptor, cation dependent(M6pr)                                                                       | -1.56912 |
| NM_010764 | mannosidase 2, alpha B1(Man2b1)                                                                                            | -1.5273  |
| NM_010786 | transformed mouse 3T3 cell double minute 2(Mdm2)                                                                           | -1.89039 |
| NM_010799 | multiple inositol polyphosphate histidine phosphatase 1(Minpp1)                                                            | -1.73944 |
| NM_010804 | myeloid/lymphoid or mixed-lineage leukemia; translocated to, 10(Mllt10)                                                    | -1.7047  |
| NM_010811 | N-deacetylase/N-sulfotransferase (heparan glucosaminy) 2(Ndst2)                                                            | -2.28469 |
| NM_010880 | nucleolin(Ncl)                                                                                                             | -1.59124 |
| NM_010898 | neurofibromatosis 2(Nf2)                                                                                                   | -1.61365 |
| NM_010924 | nicotinamide N-methyltransferase(Nnmt)                                                                                     | -1.99433 |
| NM_011015 | origin recognition complex, subunit 1(Orc1)                                                                                | -1.63468 |
| NM_011016 | orosomuroid 2(Orm2)                                                                                                        | -2.37491 |
| NM_011108 | phospholipase A2, group IIA (platelets, synovial fluid)(Pla2g2a)                                                           | -2.23962 |
| NM_011168 | prolactin family 7, subfamily a, member 2(Pr17a2)                                                                          | -1.66924 |
| NM_011252 | RNA binding motif protein, X chromosome(Rbmx)                                                                              | -2.75296 |
| NM_011253 | RNA binding motif protein, Y chromosome(Rbmy)                                                                              | -2.16121 |
| NM_011271 | ribonuclease, RNase A family, 1 (pancreatic)(Rnase1)                                                                       | -1.78995 |
| NM_011325 | sodium channel, nonvoltage-gated 1 beta(Scnn1b)                                                                            | -1.79526 |
| NM_011330 | chemokine (C-C motif) ligand 11(Ccl11)                                                                                     | -2.101   |
| NM_011360 | sarcoglycan, epsilon(Sgce)                                                                                                 | -2.64722 |
| NM_011367 | sex hormone binding globulin(Shbg)                                                                                         | -2.17274 |
| NM_011372 | ST6 (alpha-N-acetyl-neuraminy)l-2,3-beta-galactosyl-1,3)-N-acetylgalactosaminide alpha-2,6-sialyltransferase 3(St6galnac3) | -1.57323 |
| NM_011374 | ST8 alpha-N-acetyl-neuraminide alpha-2,8-sialyltransferase 1(St8sia1)                                                      | -2.04495 |
| NM_011376 | single-minded homolog 1 (Drosophila)(Sim1)                                                                                 | -2.39022 |
| NM_011384 | sine oculis-related homeobox 6(Six6)                                                                                       | -1.67581 |
| NM_011409 | schlafen 3(Slfn3)                                                                                                          | -1.74048 |
| NM_011415 | snail family zinc finger 2(Snai2)                                                                                          | -1.52775 |
| NM_011427 | snail family zinc finger 1(Snai1)                                                                                          | -1.85268 |
| NM_011432 | U1 small nuclear ribonucleoprotein C(Snrpc)                                                                                | -4.47013 |
| NM_011472 | small proline-rich protein 2F(Spr2f)                                                                                       | -1.93673 |
| NM_011474 | small proline-rich protein 2H(Spr2h)                                                                                       | -1.61327 |
| NM_011481 | src-related kinase lacking C-terminal regulatory tyrosine and N-terminal myristylation sites(Srms)                         | -2.19492 |
| NM_011500 | striatin, calmodulin binding protein(Strn)                                                                                 | -3.80443 |
| NM_011518 | spleen tyrosine kinase(Syk)                                                                                                | -2.60216 |
| NM_011529 | TRAF family member-associated Nf-kappa B activator(Tank)                                                                   | -1.66579 |

|           |                                                                            |          |
|-----------|----------------------------------------------------------------------------|----------|
| NM_011561 | thymine DNA glycosylase(Tdg)                                               | -2.6238  |
| NM_011579 | T cell specific GTPase 1(Tgtp1)                                            | -1.82522 |
| NM_011613 | tumor necrosis factor (ligand) superfamily, member 11(Tnfsf11)             | -2.17889 |
| NM_011619 | troponin T2, cardiac(Tnnt2)                                                | -1.91753 |
| NM_011626 | transmembrane protein 165(Tmem165)                                         | -1.69353 |
| NM_011668 | ubiquitin protein ligase E3A(Ube3a)                                        | -1.81814 |
| NM_011670 | ubiquitin carboxy-terminal hydrolase L1(Uchl1)                             | -1.63427 |
| NM_011714 | bromodomain adjacent to zinc finger domain, 1B(Baz1b)                      | -2.10883 |
| NM_011725 | X-linked lymphocyte-regulated(Xlr)                                         | -1.54562 |
| NM_011730 | solute carrier family 6 (neurotransmitter transporter), member 18(Slc6a18) | -1.52269 |
| NM_011775 | zona pellucida glycoprotein 2(Zp2)                                         | -1.58613 |
| NM_011801 | craniofacial development protein 1(Cfdp1)                                  | -1.78441 |
| NM_011813 | Flt3 interacting zinc finger protein 1(Fiz1)                               | -2.25061 |
| NM_011835 | katanin p60 (ATPase-containing) subunit A1(Katna1)                         | -3.7592  |
| NM_011837 | lymphocyte antigen 6 complex, locus H(Ly6h)                                | -1.59415 |
| NM_011839 | mab-21-like 2 (C. elegans)(Mab21l2)                                        | -1.56094 |
| NM_011887 | sodium channel, voltage-gated, type XI, alpha(Scn11a)                      | -1.52121 |
| NM_011891 | sarcoglycan, delta (dystrophin-associated glycoprotein)(Sgcd)              | -1.75586 |
| NM_011901 | No data                                                                    | -1.70164 |
| NM_011911 | vomer nasal 1, receptor 49(Vmn1r49)                                        | -2.31502 |
| NM_011937 | glucosamine-6-phosphate deaminase 1(Gnpda1)                                | -2.3206  |
| NM_011939 | heat shock transcription factor 4(Hsf4)                                    | -1.6302  |
| NM_011942 | lysophospholipase 2(Lypla2)                                                | -1.5278  |
| NM_011999 | C-type lectin domain family 4, member a2(Clec4a2)                          | -1.81838 |
| NM_012012 | exonuclease 1(Exo1)                                                        | -1.89393 |
| NM_012018 | centriolin(Cntrl)                                                          | -1.59032 |
| NM_012025 | Rac GTPase-activating protein 1(Racgap1)                                   | -1.64813 |
| NM_012026 | Rho guanine nucleotide exchange factor (GEF) 28(Arhgef28)                  | -1.5955  |
| NM_012047 | bromodomain containing 7(Brd7)                                             | -2.1096  |
| NM_013454 | ATP-binding cassette, sub-family A (ABC1), member 1(Abca1)                 | -2.01467 |
| NM_013510 | erythrocyte membrane protein band 4.1 like 1(Epb41l1)                      | -1.6381  |
| NM_013630 | polycystic kidney disease 1 homolog(Pkd1)                                  | -1.78849 |
| NM_013632 | purine-nucleoside phosphorylase(Pnp)                                       | -1.89386 |
| NM_013646 | RAR-related orphan receptor alpha(Rora)                                    | -1.55067 |
| NM_013652 | chemokine (C-C motif) ligand 4(Ccl4)                                       | -2.47442 |
| NM_013673 | nuclear antigen Sp100(Sp100)                                               | -2.63292 |
| NM_013674 | interferon regulatory factor 4(Irf4)                                       | -2.30309 |
| NM_013689 | tec protein tyrosine kinase(Tec)                                           | -2.14299 |
| NM_013693 | tumor necrosis factor(Tnf)                                                 | -1.50571 |
| NM_013720 | MAX gene associated(Mga)                                                   | -2.04754 |

|           |                                                                                            |          |
|-----------|--------------------------------------------------------------------------------------------|----------|
| NM_013756 | defensin beta 3(Defb3)                                                                     | -1.83018 |
| NM_013790 | ATP-binding cassette, sub-family C (CFTR/MRP), member 5(Abcc5)                             | -1.71502 |
| NM_013847 | glycine C-acetyltransferase (2-amino-3-ketobutyrate-coenzyme A ligase)(Gcat)               | -1.94794 |
| NM_015736 | UDP-N-acetyl-alpha-D-galactosamine:polypeptide N-acetylgalactosaminyltransferase 3(Galnt3) | -1.98084 |
| NM_015750 | neuraminidase 2(Neu2)                                                                      | -1.61155 |
| NM_015757 | No data                                                                                    | -1.50501 |
| NM_015766 | Epstein-Barr virus induced gene 3(Ebi3)                                                    | -1.8066  |
| NM_016696 | glypican 1(Gpc1)                                                                           | -1.83699 |
| NM_016699 | exosome component 10(Exosc10)                                                              | -2.77626 |
| NM_016798 | PDZ and LIM domain 3(Pdlim3)                                                               | -1.88991 |
| NM_016811 | diacylglycerol kinase, alpha(Dgka)                                                         | -1.71266 |
| NM_016863 | FK506 binding protein 1b(Fkbp1b)                                                           | -1.90711 |
| NM_016867 | GIPC PDZ domain containing family, member 2(Gipc2)                                         | -1.66376 |
| NM_016882 | squamous cell carcinoma antigen recognized by T cells 1(Sart1)                             | -2.19149 |
| NM_016885 | endomucin(Emcn)                                                                            | -2.42749 |
| NM_016889 | insulinoma-associated 1(Insm1)                                                             | -1.61675 |
| NM_016915 | phospholipase A2, group VI(Pla2g6)                                                         | -2.51889 |
| NM_016916 | bladder cancer associated protein(Blcap)                                                   | -2.03166 |
| NM_016918 | nudix (nucleoside diphosphate linked moiety X)-type motif 5(Nudt5)                         | -2.77459 |
| NM_016968 | oligodendrocyte transcription factor 1(Olig1)                                              | -1.66797 |
| NM_016974 | D site albumin promoter binding protein(Dbp)                                               | -3.14667 |
| NM_017376 | thyrotroph embryonic factor(Tef)                                                           | -2.53906 |
| NM_017389 | eosinophil-associated, ribonuclease A family, member 14(Ear14)                             | -2.56015 |
| NM_017396 | cytochrome P450, family 3, subfamily a, polypeptide 41A(Cyp3a41a)                          | -1.65452 |
| NM_017402 | Rho guanine nucleotide exchange factor (GEF7)(Arhgef7)                                     | -2.85974 |
| NM_017463 | pre B cell leukemia homeobox 2(Pbx2)                                                       | -2.46944 |
| NM_018739 | retinitis pigmentosa 9 (human)(Rp9)                                                        | -1.66806 |
| NM_018750 | Ras association (RalGDS/AF-6) domain family member 5(Rassf5)                               | -2.10274 |
| NM_018766 | neurotensin receptor 1(Ntsr1)                                                              | -1.52558 |
| NM_018855 | growth arrest specific 8(Gas8)                                                             | -1.55702 |
| NM_018859 | aldo-keto reductase family 1, member E1(Akr1e1)                                            | -1.65491 |
| NM_018860 | ribosomal protein L41(Rpl41)                                                               | -4.93928 |
| NM_018867 | carboxypeptidase X 2 (M14 family)(Cpxm2)                                                   | -1.88222 |
| NM_019395 | fructose biphosphatase 1(Fbp1)                                                             | -1.70938 |

|           |                                                                          |          |
|-----------|--------------------------------------------------------------------------|----------|
| NM_019404 | arginine vasopressin receptor 2(Avpr2)                                   | -1.94018 |
| NM_019409 | oligodendrocyte myelin glycoprotein(Omg)                                 | -2.99618 |
| NM_019418 | tumor necrosis factor (ligand) superfamily, member 14(Tnfsf14)           | -1.57645 |
| NM_019430 | calcium channel, voltage-dependent, gamma subunit 3(Cacng3)              | -2.49042 |
| NM_019432 | transmembrane protein 37(Tmem37)                                         | -1.66253 |
| NM_019460 | Scm-like with four mbt domains 1(Sfmbt1)                                 | -1.77992 |
| NM_019477 | acyl-CoA synthetase long-chain family member 4(Acsl4)                    | -2.77801 |
| NM_019494 | chemokine (C-X-C motif) ligand 11(Cxcl11)                                | -2.05861 |
| NM_019550 | polypyrimidine tract binding protein 2(Ptbp2)                            | -2.27775 |
| NM_019580 | glycerophosphodiester phosphodiesterase 1(Gde1)                          | -2.3258  |
| NM_019640 | phosphatidylinositol transfer protein, beta(Pitpnb)                      | -2.20408 |
| NM_019642 | ribophorin II(Rpn2)                                                      | -1.59846 |
| NM_019649 | cleft lip and palate associated transmembrane protein 1(Clptm1)          | -2.12902 |
| NM_019660 | MYC binding protein(Mycbp)                                               | -1.66416 |
| NM_019687 | solute carrier family 22 (organic cation transporter), member 4(Slc22a4) | -1.62435 |
| NM_019708 | short coiled-coil protein(Scoc)                                          | -1.86737 |
| NM_019713 | Ras association (RalGDS/AF-6) domain family member 1(Rassf1)             | -1.66723 |
| NM_019735 | APAF1 interacting protein(Apip)                                          | -1.95336 |
| NM_019748 | SUMO1 activating enzyme subunit 1(Sae1)                                  | -1.68515 |
| NM_019759 | dermatopontin(Dpt)                                                       | -1.73769 |
| NM_019789 | Kv channel interacting protein 3, calsenilin(Kcnip3)                     | -1.85678 |
| NM_019791 | melanoma antigen, family D, 1(Maged1)                                    | -2.50307 |
| NM_019814 | HIG1 domain family, member 1A(Higd1a)                                    | -2.23671 |
| NM_019870 | N(alpha)-acetyltransferase 10, NatA catalytic subunit(Naa10)             | -1.64223 |
| NM_019910 | demilune cell and parotid protein 1(Dcpp1)                               | -1.83875 |
| NM_019911 | tryptophan 2,3-dioxygenase(Tdo2)                                         | -1.52195 |
| NM_019934 | secretory blood group 1(Sec1)                                            | -1.8747  |
| NM_019944 | motor neuron and pancreas homeobox 1(Mnx1)                               | -2.3514  |
| NM_019974 | kallikrein related-peptidase 11(Klk11)                                   | -1.58925 |
| NM_019977 | myo-inositol oxygenase(Miox)                                             | -1.94701 |
| NM_020001 | C-type lectin domain family 4, member n(Clec4n)                          | -1.60912 |
| NM_020010 | cytochrome P450, family 51(Cyp51)                                        | -1.78741 |
| NM_020046 | dihydroorotate dehydrogenase(Dhodh)                                      | -1.68362 |
| NM_020279 | chemokine (C-C motif) ligand 28(Ccl28)                                   | -1.56463 |
| NM_020331 | general transcription factor II I repeat domain-containing 1(Gtf2ird1)   | -1.72877 |
| NM_020493 | serum response factor(Srf)                                               | -1.52236 |
| NM_020502 | taste receptor, type 2, member 108(Tas2r108)                             | -1.58022 |

|           |                                                                                             |          |
|-----------|---------------------------------------------------------------------------------------------|----------|
| NM_020508 | bromodomain containing 4(Brd4)                                                              | -1.64576 |
| NM_020563 | secretoglobin, family 1B, member 2(Scgb1b2)                                                 | -1.59031 |
| NM_020565 | sulfotransferase family 3A, member 1(Sult3a1)                                               | -3.4312  |
| NM_020606 | parvin, alpha(Parva)                                                                        | -1.69149 |
| NM_021041 | ATP-binding cassette, sub-family C (CFTR/MRP), member 9(Abcc9)                              | -1.61461 |
| NM_021318 | four and a half LIM domains 5(Fhl5)                                                         | -1.73321 |
| NM_021342 | potassium voltage-gated channel, Isk-related subfamily, gene 4(Kcne4)                       | -2.14765 |
| NM_021353 | solute carrier family 26, member 3(Slc26a3)                                                 | -1.56811 |
| NM_021356 | growth factor receptor bound protein 2-associated protein 1(Gab1)                           | -1.9641  |
| NM_021400 | proteoglycan 4 (megakaryocyte stimulating factor, articular superficial zone protein)(Prg4) | -2.01968 |
| NM_021403 | serine/arginine repetitive matrix 3(Srrm3)                                                  | -1.67452 |
| NM_021408 | Usher syndrome 2A(Ush2a)                                                                    | -1.62374 |
| NM_021480 | L-threonine dehydrogenase(Tdh)                                                              | -2.82215 |
| NM_021486 | beta-carotene oxygenase 1(Bco1)                                                             | -1.92372 |
| NM_021499 | WD repeat containing, antisense to Trp73(Wrap73)                                            | -1.7629  |
| NM_021524 | nicotinamide phosphoribosyltransferase(Nampt)                                               | -1.87268 |
| NM_021549 | polynucleotide kinase 3'-phosphatase(Pnkp)                                                  | -1.84973 |
| NM_021714 | WW domain binding protein 11(Wbp11)                                                         | -1.54872 |
| NM_022988 | Ngg1 interacting factor 3-like 1 (S. pombe)(Nif3l1)                                         | -1.51491 |
| NM_023200 | protein phosphatase 1, regulatory (inhibitor) subunit 7(Ppp1r7)                             | -1.79937 |
| NM_023429 | OCIA domain containing 1(Ociad1)                                                            | -1.90247 |
| NM_023455 | N-acetyltransferase 8 (GCN5-related)(Nat8)                                                  | -1.64417 |
| NM_023718 | solute carrier organic anion transporter family, member 1a6(Slco1a6)                        | -1.53675 |
| NM_023835 | tripartite motif-containing 12A(Trim12a)                                                    | -1.65037 |
| NM_023907 | forkhead box l1(Foxl1)                                                                      | -1.5694  |
| NM_024174 | mitochondrial ribosomal protein S23(Mrps23)                                                 | -2.42124 |
| NM_024199 | cleavage stimulation factor, 3' pre-RNA, subunit 1(Cstf1)                                   | -1.74319 |
| NM_024201 | coiled-coil domain containing 127(Ccdc127)                                                  | -1.62271 |
| NM_024214 | translocase of outer mitochondrial membrane 20 homolog (yeast)(Tomm20)                      | -1.53588 |
| NM_024261 | acidic residue methyltransferase 1(Armt1)                                                   | -1.88922 |
| NM_024438 | dual specificity phosphatase 19(Dusp19)                                                     | -1.6353  |
| NM_024474 | collagen, type XXVI, alpha 1(Col26a1)                                                       | -1.61806 |
| NM_025320 | RIKEN cDNA 0610012G03 gene(0610012G03Rik)                                                   | -1.94074 |
| NM_025389 | anaphase promoting complex subunit 11(Anapc11)                                              | -1.70561 |
| NM_025435 | THO complex 7(Thoc7)                                                                        | -1.52464 |
| NM_025459 | family with sequence similarity 134, member B(Fam134b)                                      | -1.60618 |



|           |                                                                          |          |
|-----------|--------------------------------------------------------------------------|----------|
| NM_025466 | gastrokine 1(Gkn1)                                                       | -1.75298 |
| NM_025479 | M-phase specific PLK1 intereacting protein(Mplkip)                       | -1.66362 |
| NM_025520 | LSM5 homolog, U6 small nuclear RNA and mRNA degradation associated(Lsm5) | -2.09102 |
| NM_025533 | nitric oxide synthase interacting protein(Nosip)                         | -1.65925 |
| NM_025711 | asporin(Aspn)                                                            | -1.79731 |
| NM_025719 | NFKB activating protein-like(Nkapl)                                      | -1.51929 |
| NM_025724 | coiled-coil glutamate-rich protein 1(Ccer1)                              | -1.99108 |
| NM_025730 | leucine-rich repeat kinase 2(Lrrk2)                                      | -1.76091 |
| NM_025766 | family with sequence similarity 187, member A(Fam187a)                   | -2.12659 |
| NM_025768 | GH regulated TBC protein 1(Grtp1)                                        | -1.61894 |
| NM_025798 | histidine triad nucleotide binding protein 3(Hint3)                      | -1.70486 |
| NM_025836 | perilipin 3(Plin3)                                                       | -1.57356 |
| NM_025842 | vacuolar protein sorting 28(Vps28)                                       | -1.58317 |
| NM_025846 | related RAS viral (r-ras) oncogene 2(Rras2)                              | -2.50215 |
| NM_025879 | trafficking protein particle complex 13(Trappc13)                        | -2.15507 |
| NM_025884 | zinc finger protein 830(Zfp830)                                          | -1.63895 |
| NM_025894 | proteasome (prosome, macropain) 26S subunit, non-ATPase, 12(Psmd12)      | -2.08626 |
| NM_025975 | dynein light chain Tctex-type 3(Dynlt3)                                  | -2.28686 |
| NM_026055 | ribosomal protein L39(Rpl39)                                             | -1.78892 |
| NM_026069 | ribosomal protein L37(Rpl37)                                             | -2.0043  |
| NM_026099 | testis expressed 43(Tex43)                                               | -2.28245 |
| NM_026158 | isochorismatase domain containing 2b(Isoc2b)                             | -1.84271 |
| NM_026172 | 2,4-dienoyl CoA reductase 1, mitochondrial(Decr1)                        | -1.55611 |
| NM_026219 | ubiquinol-cytochrome c reductase binding protein(Uqcrb)                  | -2.10143 |
| NM_026248 | RIKEN cDNA 4930430A15 gene(4930430A15Rik)                                | -2.65065 |
| NM_026262 | RIKEN cDNA 4930524B15 gene(4930524B15Rik)                                | -2.01857 |
| NM_026286 | ferritin mitochondrial(Ftmt)                                             | -1.85032 |
| NM_026288 | RIKEN cDNA 4930483J18 gene(4930483J18Rik)                                | -1.67685 |
| NM_026290 | armadillo repeat containing 12(Armc12)                                   | -1.62239 |
| NM_026300 | RIKEN cDNA 4930549C01 gene(4930549C01Rik)                                | -2.23761 |
| NM_026374 | interleukin enhancer binding factor 2(Ifb2)                              | -1.95176 |
| NM_026382 | small nuclear ribonucleoprotein 48 (U11/U12)(Snrnp48)                    | -1.53061 |
| NM_026386 | sorting nexin 2(Snx2)                                                    | -1.56212 |
| NM_026405 | RAB32, member RAS oncogene family(Rab32)                                 | -1.51866 |
| NM_026410 | cell division cycle associated 5(Cdca5)                                  | -2.12289 |
| NM_026429 | trophoblast specific protein beta(Tpbpb)                                 | -1.63192 |
| NM_026433 | transmembrane protein 100(Tmem100)                                       | -2.0722  |
| NM_026438 | pyrophosphatase (inorganic) 1(Ppa1)                                      | -1.96412 |
| NM_026493 | centrosome and spindle pole associated protein 1(Cspp1)                  | -2.19055 |

|           |                                                                                             |          |
|-----------|---------------------------------------------------------------------------------------------|----------|
| NM_026559 | thioredoxin domain containing 17(Txn17)                                                     | -1.53872 |
| NM_026565 | apolipoprotein O-like(Apool)                                                                | -1.51837 |
| NM_026625 | RIKEN cDNA 1700067P10 gene(1700067P10Rik)                                                   | -2.57866 |
| NM_026649 | zinc finger protein 85, opposite strand(Zfp85os)                                            | -2.40677 |
| NM_026662 | phosphoribosyl pyrophosphate synthetase 2(Prps2)                                            | -2.11254 |
| NM_026668 | leucine-rich repeats and IQ motif containing 4(Lrriq4)                                      | -1.5594  |
| NM_026807 | keratin associated protein 4-2(Krtap4-2)                                                    | -1.65994 |
| NM_027170 | RIKEN cDNA 2310057N15 gene(2310057N15Rik)                                                   | -1.82178 |
| NM_027324 | sideroflexin 1(Sfxn1)                                                                       | -1.82477 |
| NM_027609 | spermatogenesis associated glutamate (E)-rich protein 4F1(Speer4f1)                         | -1.62015 |
| NM_027639 | No data                                                                                     | -1.54884 |
| NM_028152 | MMS19 (MET18 <i>S. cerevisiae</i> )(Mms19)                                                  | -1.65522 |
| NM_029351 | keratin associated protein 9-3(Krtap9-3)                                                    | -1.62944 |
| NM_029509 | guanylate-binding protein 8(Gbp8)                                                           | -1.5953  |
| NM_029813 | predicted gene 14296(Gm14296)                                                               | -1.59371 |
| NM_030252 | small integral membrane protein 12(Smim12)                                                  | -1.62796 |
| NM_031192 | renin 1 structural(Ren1)                                                                    | -1.89295 |
| NM_031250 | urocortin 3(Ucn3)                                                                           | -1.89842 |
| NM_031385 | testis expressed gene 18(Tex18)                                                             | -1.778   |
| NM_031494 | zinc finger protein 275(Zfp275)                                                             | -1.56144 |
| NM_033354 | SEC16 homolog B ( <i>S. cerevisiae</i> )(Sec16b)                                            | -1.66262 |
| S43865    | protein phosphatase 3, regulatory subunit B, alpha isoform (calcineurin B, type II)(Ppp3r2) | -1.54662 |
| S50265    | No data                                                                                     | -1.66087 |
| S54207    | No data                                                                                     | -1.88896 |
| S59139    | No data                                                                                     | -1.56437 |
| S60833    | No data                                                                                     | -1.73636 |
| S66856    | No data                                                                                     | -1.85429 |
| S68022    | BRCA1/BRCA2-containing complex, subunit 3(Brcc3)                                            | -1.96507 |
| S74545    | No data                                                                                     | -2.3506  |
| S78554    | No data                                                                                     | -2.47524 |
| S81417    | No data                                                                                     | -1.9152  |
| S83332    | No data                                                                                     | -1.90735 |
| S85735    | No data                                                                                     | -2.12267 |
| U00941    | No data                                                                                     | -2.3298  |
| U06662    | oncofetal antigen(Ofa)                                                                      | -1.96381 |
| U07879    | No data                                                                                     | -1.59281 |
| U10305    | killer cell lectin-like receptor, subfamily A, member 3(Klra3)                              | -1.55057 |
| U12889    | killer cell lectin-like receptor, subfamily A, member 8(Klra8)                              | -1.87675 |
| U21455    | No data                                                                                     | -1.97766 |
| U21568    | No data                                                                                     | -1.8979  |

|        |                                                                           |          |
|--------|---------------------------------------------------------------------------|----------|
| U21570 | No data                                                                   | -1.79922 |
| U21571 | No data                                                                   | -1.76159 |
| U25122 | No data                                                                   | -1.78449 |
| U26225 | No data                                                                   | -1.90738 |
| U26229 | No data                                                                   | -1.69199 |
| U26993 | No data                                                                   | -1.62013 |
| U28068 | neurogenic differentiation 1(Neurod1)                                     | -1.80061 |
| U29266 | No data                                                                   | -1.62516 |
| U29504 | zinc finger protein 26(Zfp26)                                             | -2.06202 |
| U29508 | zinc finger protein 72(Zfp72)                                             | -2.03654 |
| U29510 | zinc finger protein 52(Zfp52)                                             | -1.9915  |
| U37222 | adiponectin, C1Q and collagen domain containing(Adipoq)                   | -2.04355 |
| U38502 | guanine nucleotide binding protein (G protein), alpha inhibiting 3(Gnai3) | -1.56935 |
| U41805 | transmembrane p24 trafficking protein 1(Tmed1)                            | -1.69526 |
| U49723 | guanylate cyclase 2c(Gucy2c)                                              | -2.46854 |
| U51459 | No data                                                                   | -1.75409 |
| U51468 | No data                                                                   | -1.52962 |
| U55443 | No data                                                                   | -1.65066 |
| U55608 | No data                                                                   | -2.1723  |
| U55616 | No data                                                                   | -1.76682 |
| U55633 | No data                                                                   | -1.54888 |
| U55643 | No data                                                                   | -1.86672 |
| U55679 | No data                                                                   | -2.20342 |
| U55680 | No data                                                                   | -1.62481 |
| U55699 | No data                                                                   | -1.56775 |
| U59509 | NADH dehydrogenase (ubiquinone) 1 alpha subcomplex, 4(Ndufa4)             | -2.17292 |
| U62658 | No data                                                                   | -1.50739 |
| U62922 | No data                                                                   | -2.18399 |
| U63146 | retinol binding protein 4, plasma(Rbp4)                                   | -2.52389 |
| U63547 | No data                                                                   | -2.20462 |
| U68232 | No data                                                                   | -1.54754 |
| U72679 | fumarate hydratase 1(Fh1)                                                 | -2.28147 |
| U73591 | No data                                                                   | -1.86203 |
| U86735 | No data                                                                   | -1.65635 |
| U87620 | Spi-B transcription factor (Spi-1/PU.1 related)(Spib)                     | -2.29174 |
| U89733 | No data                                                                   | -1.82509 |
| U89735 | No data                                                                   | -1.76427 |
| U90029 | bicaudal D homolog 1 (Drosophila)(Bicd1)                                  | -2.19618 |
| U97181 | No data                                                                   | -2.07594 |
| X02968 | No data                                                                   | -2.87806 |

|        |                                                               |          |
|--------|---------------------------------------------------------------|----------|
| X03688 | eukaryotic translation elongation factor 1 alpha 1(Eef1a1)    | -2.00008 |
| X03766 | actin, alpha 1, skeletal muscle(Acta1)                        | -1.64999 |
| X03859 | No data                                                       | -1.62472 |
| X03943 | receptor accessory protein 3(Reep3)                           | -1.59285 |
| X04097 | No data                                                       | -1.63934 |
| X05786 | No data                                                       | -1.58962 |
| X05878 | No data                                                       | -2.07149 |
| X06505 | No data                                                       | -1.87647 |
| X06530 | No data                                                       | -2.21836 |
| X14623 | immunoglobulin heavy variable 1-47(Ighv1-47)                  | -1.76391 |
| X16493 | zinc finger protein 1(Zfp1)                                   | -1.77776 |
| X17165 | No data                                                       | -1.97389 |
| X52448 | No data                                                       | -1.52863 |
| X55823 | No data                                                       | -1.84924 |
| X56461 | homeobox B6(Hoxb6)                                            | -1.70857 |
| X56565 | retinoic acid receptor, alpha(Rara)                           | -1.6819  |
| X57302 | No data                                                       | -1.73076 |
| X58472 | Kin17 DNA and RNA binding protein(Kin)                        | -2.28155 |
| X61397 | No data                                                       | -1.83077 |
| X61756 | No data                                                       | -2.02208 |
| X61761 | No data                                                       | -1.56395 |
| X67210 | Immunoglobulin heavy chain (gamma polypeptide)(Ighg)          | -1.83054 |
| X67801 | No data                                                       | -1.61783 |
| X70032 | nebulin(Neb)                                                  | -2.30894 |
| X73433 | No data                                                       | -1.58696 |
| X74134 | nuclear receptor subfamily 2, group F, member 1(Nr2f1)        | -2.30282 |
| X79214 | No data                                                       | -1.8285  |
| X80436 | nuclear transcription factor, X-box binding 1(Nfx1)           | -2.31783 |
| X87742 | No data                                                       | -1.8287  |
| X87747 | No data                                                       | -1.51781 |
| X89594 | estrogen related receptor, beta(Esrrb)                        | -2.0562  |
| X89693 | olfactory receptor 242(Olfr242)                               | -2.28826 |
| X93167 | fibronectin 1(Fn1)                                            | -1.77527 |
| X95346 | phospholipase C, gamma 1(Plcg1)                               | -2.07645 |
| X96606 | ovary testis transcribed(Ott)                                 | -1.97775 |
| X97581 | sal-like 3 (Drosophila)(Sall3)                                | -2.65744 |
| X98848 | 6-phosphofructo-2-kinase/fructose-2,6-biphosphatase 1(Pfkfb1) | -2.76848 |
| X99246 | No data                                                       | -1.8425  |
| X99253 | testis expressed gene 2(Tex2)                                 | -1.54143 |
| Y08234 | No data                                                       | -1.97383 |

|        |                                                                 |          |
|--------|-----------------------------------------------------------------|----------|
| Y10972 | No data                                                         | -1.8388  |
| Y14821 | No data                                                         | -2.81722 |
| Y15526 | olfactory receptor 77(Olfr77)                                   | -2.5336  |
| Y17856 | ganglioside-induced differentiation-associated-protein 7(Gdap7) | -2.25544 |
| Z12222 | No data                                                         | -1.78571 |
| Z12224 | No data                                                         | -1.86835 |
| Z12229 | No data                                                         | -2.10256 |
| Z12263 | No data                                                         | -1.60881 |
| Z12267 | No data                                                         | -1.72722 |
| Z12380 | No data                                                         | -2.92528 |
| Z12414 | No data                                                         | -2.64156 |
| Z12420 | No data                                                         | -2.48084 |
| Z12424 | No data                                                         | -1.71653 |
| Z12457 | No data                                                         | -1.65021 |
| Z12510 | No data                                                         | -1.53962 |
| Z12526 | No data                                                         | -1.53966 |
| Z16406 | mesenchyme homeobox 2(Meox2)                                    | -1.73037 |
| Z18670 | immunoglobulin kappa variable 4-68(Igkv4-68)                    | -1.84985 |
| Z22029 | No data                                                         | -2.05509 |
| Z22043 | No data                                                         | -1.62642 |
| Z22092 | No data                                                         | -1.65667 |
| Z22098 | No data                                                         | -3.42518 |
| Z22141 | No data                                                         | -1.57303 |
| Z29628 | POU domain, class 1, transcription factor 1(Pou1f1)             | -1.57309 |
| Z78150 | solute carrier family 39 (zinc transporter), member 1(Slc39a1)  | -1.9264  |
| Z78157 | No data                                                         | -2.15698 |
| Z78161 | ribulose-5-phosphate-3-epimerase(Rpe)                           | -3.29987 |
| Z83810 | dynein, axonemal, heavy chain 7B(Dnah7b)                        | -1.89867 |
| Z86034 | No data                                                         | -1.93385 |
